# Supplementary material for: Caesarean sections and private insurance: systematic review and meta-analysis
Source: PubMed Central journal article supplement — BMJ Open. 2017 Aug 21;7(8):e016600. doi: 10.1136/bmjopen-2017-016600 (PMC5629699; doi:10.1136/bmjopen-2017-016600), 2017-08-21
Supplement: bmjopen-2017-016600.draft_revisions.pdf [file bmjopen-2017-016600.draft_revisions.pdf]

# BMJ Open

BMJ Open is committed to open peer review. As part of this commitment we make the peer review history of every article we publish publicly available.

When an article is published we post the peer reviewers' comments and the authors' responses online. We also post the versions of the paper that were used during peer review. These are the versions that the peer review comments apply to.

The versions of the paper that follow are the versions that were submitted during the peer review process. They are not the versions of record or the final published versions. They should not be cited or distributed as the published version of this manuscript.

BMJ Open is an open access journal and the full, final, typeset and author-corrected version of record of the manuscript is available on our site with no access controls, subscription charges or pay-per-view fees (<http://bmjopen.bmj.com>).

If you have any questions on BMJ Open's open peer review process please email [editorial.bmjopen@bmj.com](mailto:editorial.bmjopen@bmj.com)

# BMJ Open

## Caesarean Sections and Private Insurance: Systematic Review and Meta-analysis

|                                 |                                                                                                                                                                                                                                                                                                                                                                                                                                                                                                                                                                                                                  |
|---------------------------------|------------------------------------------------------------------------------------------------------------------------------------------------------------------------------------------------------------------------------------------------------------------------------------------------------------------------------------------------------------------------------------------------------------------------------------------------------------------------------------------------------------------------------------------------------------------------------------------------------------------|
| Journal:                        | <i>BMJ Open</i>                                                                                                                                                                                                                                                                                                                                                                                                                                                                                                                                                                                                  |
| Manuscript ID                   | bmjopen-2017-016600                                                                                                                                                                                                                                                                                                                                                                                                                                                                                                                                                                                              |
| Article Type:                   | Research                                                                                                                                                                                                                                                                                                                                                                                                                                                                                                                                                                                                         |
| Date Submitted by the Author:   | 24-Feb-2017                                                                                                                                                                                                                                                                                                                                                                                                                                                                                                                                                                                                      |
| Complete List of Authors:       | Hoxha, Ilir; Universitat Bern Institut fur Sozial- und Praventivmedizin, Health Services Research<br>Syrogiannouli, Lamprini; Universitat Bern, Berner Institut für Hausarztmedizin (BIHAM)<br>Braha, Medina; International Business College Mitrovica, Department of Managment and Marketing<br>Goodman, David C; Dartmouth College Geisel School of Medicine<br>da Costa, Bruno; Universitat Bern, Berner Institut für Hausarztmedizin (BIHAM)<br>Jüni, Peter; Applied Health Research Centre (AHRC), Li Ka Shing Knowledge Institute of St. Michael's Hospital, Department of Medicine, University of Toronto |
| <b>Primary Subject Heading</b>: | Health services research                                                                                                                                                                                                                                                                                                                                                                                                                                                                                                                                                                                         |
| Secondary Subject Heading:      | Health economics, Health policy, Health services research, Obstetrics and gynaecology                                                                                                                                                                                                                                                                                                                                                                                                                                                                                                                            |
| Keywords:                       | caesarean section, health insurance, private insurance, financial incentives, medical practice variation, health services                                                                                                                                                                                                                                                                                                                                                                                                                                                                                        |
|                                 |                                                                                                                                                                                                                                                                                                                                                                                                                                                                                                                                                                                                                  |

SCHOLARONE™  
Manuscripts

## Caesarean Sections and Private Insurance: Systematic Review and Meta-analysis

*Ilir Hoxha PhD Student,<sup>a,b</sup> Lamprini Syrogiannouli Research Associate,<sup>b</sup> Medina Braha Lecturer, David C. Goodman Professor of Paediatrics,<sup>ad</sup> Bruno R. da Costa Head of Statistics & Methodology,<sup>b</sup> Peter Jüni Professor of Medicine and Director<sup>e</sup>*

<sup>a</sup> Institute of Social and Preventive Medicine, University of Bern, 3012 Bern, Switzerland

<sup>b</sup> Institute of Primary Health Care, University of Bern, 3012 Bern, Switzerland

<sup>c</sup> International Business College Mitrovica, 40000 Mitrovica, Kosovo

<sup>d</sup> The Dartmouth Institute for Health Policy and Clinical Practice, 03766 Lebanon, NH, United States

<sup>e</sup> Applied Health Research Centre (AHRC), Li Ka Shing Knowledge Institute of St. Michael's Hospital, Department of Medicine, University of Toronto, M5B 1M8 Toronto, ON, Canada

*Correspondence to: Ilir Hoxha, Finkenhubelweg 11, 3012 Bern, Switzerland; [ilir.hoxha@ispm.unibe.ch](mailto:ilir.hoxha@ispm.unibe.ch); +377 45 588 683*

### Key words

caesarean section, health insurance, private insurance, financial incentives, medical practice variation, health services

### Word count

2374 words excluding title page, abstract, references, figures and tables.

## Abstract

**Objective** - Financial incentives associated with private insurance may encourage health care providers to perform more caesarean sections. We therefore sought to determine the association of private insurance and odds of caesarean section.

**Design** - Systematic review and meta-analysis.

**Data sources** - MEDLINE, Embase, and The Cochrane Library from the first year of records through August 2016.

**Eligibility criteria** – We included studies that reported data to allow the calculation of odds ratios of caesarean section of privately insured as compared to publicly insured women.

**Outcomes** - The pre-specified primary outcome was the adjusted odds ratio of births delivered by caesarean section of women covered with private insurance as compared with women covered with public insurance. The pre-specified secondary outcome was the crude odds ratio of births delivered by caesarean section of women covered with private insurance as compared with women covered with public insurance.

**Results** - Eighteen articles describing 21 separate studies in 12.9 million women were included in this study. In a meta-analysis of 13 studies, the adjusted odds of delivery by caesarean section was 1.14 higher among privately insured women as compared with women with public insurance coverage (95% CI 1.08 to 1.22) with no relevant heterogeneity between studies ( $\tau^2 \leq 0.008$ ). The meta-analysis of crude estimates from 11 studies revealed a somewhat more pronounced association (pooled odds ratio 1.36, 95% CI 1.27 to 1.45) with no relevant heterogeneity between studies ( $\tau^2 \geq 0.012$ ).

**Conclusions** - Caesarean sections are more likely to be performed in privately insured women as compared with women using public health insurance coverage. Although this



1  
2  
3  
4  
5  
6  
7  
8  
9  
10  
11  
12  
13  
14  
15  
16  
17  
18  
19  
20  
21  
22  
23  
24  
25  
26  
27  
28  
29  
30  
31  
32  
33  
34  
35  
36  
37  
38  
39  
40  
41  
42  
43  
44  
45  
46  
47  
48  
49  
50  
51  
52  
53  
54  
55  
56  
57  
58  
59  
60

effect is small on average and variable in its magnitude, it is present in all analyses we performed.

For peer review only

## Strengths and limitations of this study

- ✓ Our meta-analysis includes a broad literature search, screening and data extraction performed in duplicate and an exploration of study characteristics as a potential source of variation between studies and represents major strength of our study.
- ✓ Sensitivity analyses was performed involving studies that required exclusion in main analysis due to overlapping populations.
- ✓ The differences in the characteristics of the study populations, type of data used, types of CS analysed and variables used for adjustment in statistical analyses across studies represent a major limitation of our study.
- ✓ Unadjusted estimates of associations were larger, which suggests the presence of confounding, and we cannot completely rule out residual confounding in adjusted estimates.

## Introduction

The global raise of caesarean section (CS) rates during the past decades has raised concerns over appropriateness of usage of the procedure (1, 2). The increase and immense variation among countries' regions and hospitals has been persistent over the years (3-14). Brazil has the highest rate of CS followed by China, Turkey, and Mexico (15). United States and other developed countries are not far behind. Even countries which traditionally have had low CS rates, like Norway or Sweden have seen substantial increase in CS rates (15). This increase has been accompanied with considerable variation within countries (15). In US there was a fourfold difference in CS rates in low and high use areas (15). In England, the rates have varied threefold among National Health Service trusts (15). In British Columbia, Canada, the CS rates varied from 14.7 % to 27.6 % across health service delivery areas (15). The understanding of escalation of CS rates is important as it may prevent negative outcomes on health of mothers and newborns as well as reduce unnecessary costs related to delivery.

Such increase and variation cannot be explained by clinical factors alone (15). Evidence points to many additional, health system related factors, in particular supplier related factors (15). Financial incentives associated with private insurance seem to influence supplier behaviour, be that physician or hospital, affecting this way clinical decision as to whether perform CS or not (14-22). We therefore performed a systematic review and meta-analysis to determine the association of insurance status of women with the odds of delivery by CS.

## Materials and methods

### *Search strategy and data sources*

We combined search terms indicating CS, such as 'caesarean section', 'caesarean delivery', 'caesarean', with search terms associated with the study design such as 'small area analysis,' 'medical practice variation,' and search terms associated with determinants of variation and

1  
2  
3 increase of CS rates. We did not restrict search by type of language or publication date. We  
4  
5 searched MEDLINE, Embase, and The Cochrane Library from inception to August 4, 2016,  
6  
7 when the search was last updated. In addition, we manually searched the reference lists of all  
8  
9 included studies and earlier systematic reviews that we identified.  
10

### 11 12 13 ***Study selection and outcomes***

14  
15 To be eligible for inclusion, studies had to report data to allow the calculation of odds ratios  
16  
17 (OR) of CS comparing women covered by private insurance with women covered by public  
18  
19 insurance in a specific health care system. The pre-specified primary outcome was the  
20  
21 adjusted OR of births delivered by CS of women covered with private insurance as compared  
22  
23 with women with public insurance coverage. The pre-specified secondary outcome was the  
24  
25 crude OR of CS of women covered with private insurance as compared with women with  
26  
27 public insurance.  
28  
29

### 30 31 32 ***Data extraction***

33  
34 Two researchers (IH and MB) screened the papers and extracted data independently.  
35  
36 Differences were resolved by consensus. Data from full text articles were extracted onto a  
37  
38 data extraction sheet designed to capture data on study population, study design, data sources,  
39  
40 setting, type of CS analysed, and statistical analysis. We extracted adjusted and/or unadjusted  
41  
42 ORs of CS of women with private insurance as compared with CS of women with public  
43  
44 insurance.  
45  
46

### 47 48 49 ***Main analysis***

50  
51 We used standard inverse-variance random effects meta-analysis to combine overall OR. An  
52  
53 OR above one indicates that CS are more frequently performed in women with private  
54  
55 insurance than in women with public insurance. We calculated the variance estimate  $\tau^2$  as a  
56  
57 measure of heterogeneity between studies (23). We pre-specified a  $\tau^2$  of 0.04 to represent low  
58  
59  
60

1  
2  
3 heterogeneity, 0.16 to represent moderate, and 0.36 to represent high heterogeneity between  
4  
5 studies (24). We conducted analyses stratified by study design, period of data collection,  
6  
7 country, type of CS analysed, parity, inclusion of women with previous CS, and pregnancy  
8  
9 risk of included women to investigate potential reasons for between-study heterogeneity and  
10  
11 used chi-square tests to calculate p-values for interaction, or tests for linear trends in cases of  
12  
13 more than two ordered strata. All p-values are two-sided.  
14  
15

### 16 17 *Sensitivity analysis*

18  
19 Five studies (25-29) were excluded from the main analysis, as they had an overlapping  
20  
21 population with a larger study (30) that was included. For this reason, we repeated all  
22  
23 analyses including these five studies (25-29) while excluding the larger one (30). We used  
24  
25 STATA, release 13, for all analyses (Stata-Corp, College Station, Texas).  
26  
27

### 28 29 *Patient involvement*

30  
31 No patients were involved in this study. We used data from published papers only.  
32  
33

## 34 35 **Results**

36  
37 We identified a total of 1490 records with our search strategy (Figure 1): 935 from Medline:  
38  
39 494 from Embase; 38 from the Cochrane Library and 23 from manual search. After removing  
40  
41 duplicates, we screened 1264 records for eligibility, and retained 166 for full text  
42  
43 examination. We excluded another 124 that did not report insurance status of women, 23 that  
44  
45 were otherwise irrelevant and one study that had an overlapping population. Finally, 18  
46  
47 articles describing 21 separate studies in 12.9 million women were included in review and  
48  
49 meta-analysis.  
50  
51

52  
53  
54 Characteristics of studies are presented in Table 1 and Appendixes 1,2 and 3. Sixteen studies  
55  
56 were cross-sectional, five were retrospective cohort studies. Only one study used surveys, 18  
57  
58  
59  
60

1  
2  
3 hospital records, seven birth registries, and one census data. All studies were published in  
4 English. Most studies were from the United States. Nineteen studies included the entire  
5 population of eligible cases, while only two studies selected cases randomly. Case exclusion  
6 criteria varied considerably: one study excluded women aged 14 and younger; three excluded  
7 multiparas; eight excluded women with previous CS; eight excluded stillbirths and nine  
8 multiple births; six excluded cases with specific presentations of the foetus; six studies  
9 excluded preterm births, and 13 studies excluded cases due to provider characteristics. Two  
10 studies reported ORs of CS for which indication was established before labour (including CS  
11 on maternal request) only, three reported CS for which indication was established during  
12 labour and 16 reported ORs of any CS irrespective of indication. Eighteen studies adjusted  
13 for different characteristics as presented in Appendix 3.

14  
15  
16  
17  
18  
19  
20  
21  
22  
23  
24  
25  
26  
27  
28 Figure 2 presents the meta-analysis of the 13 studies that reported adjusted ORs (30-40), all  
29 of them using public insurance as the reference group. Overall, the odds of receiving CS were  
30 1.14 higher for women with private insurance coverage as compared women with public  
31 health insurance coverage (95% CI 1.08 to 1.22), with no relevant heterogeneity between  
32 studies ( $\tau^2 \leq 0.008$ ). Figure 3 presents results of stratified analyses of adjusted odds ratios.  
33  
34  
35  
36  
37  
38  
39  
40  
41  
42  
43  
44  
45  
46  
47  
48  
49  
50  
51  
52  
53  
54  
55  
56  
57  
58  
59  
60  
Estimates varied between strata, in particular for country (P for interaction < 0.001), type of  
caesarean section (P for interaction = 0.001), inclusion of women with previous CS (P for  
interaction = 0.001) and pregnancy risk (P for interaction < 0.001). Figure 4 presents the meta-  
analysis of crude ORs with a slightly stronger average association (pooled OR 1.36, 95% CI  
1.27 to 1.45) and no relevant heterogeneity between studies ( $\tau^2 \leq 0.012$ ). Appendix 4 presents  
adjusted associations for different states in the United States. Adjusted estimates ranged from  
0.96 in Maryland to 2.09 in Florida.

1  
2  
3 Appendixes 5 to 7 report results from sensitivity analyses after inclusion of five smaller  
4 studies (25-29) and exclusion of a larger study (30) that had overlapping populations with the  
5 five smaller ones. Appendix 5 shows the meta-analysis of the 16 studies (25-28, 31-40) with  
6 a pooled adjusted OR of 1.17 (95% CI 1.09 to 1.26) and no evidence for relevant  
7 heterogeneity between studies ( $\tau^2 \leq 0.017$ ). Appendix 6 presents results of stratified analyses,  
8 with estimates varying between countries (P for interaction  $< 0.001$ ), type of caesarean section  
9 (P for interaction = 0.003) and pregnancy risks (P for interaction  $< 0.001$ ). Finally, Appendix 7  
10 presents the meta-analysis of crude ORs, again with a stronger association on average (pooled  
11 OR 1.35, 95% CI 1.25 to 1.42) and no relevant heterogeneity between studies ( $\tau^2 \leq 0.015$ ).  
12  
13  
14  
15  
16  
17  
18  
19  
20  
21  
22  
23  
24

## 25 Discussion

26  
27 Our systematic review and meta-analysis estimated that the overall odds of receiving a  
28 caesarean section are on average 1.14 times higher for privately insured women compared  
29 with women covered with public insurance. The increased risk was observed across all  
30 subgroups of studies in stratified analyses as well as in sensitivity analysis.  
31  
32  
33  
34  
35  
36

## 37 Context

38  
39 To our knowledge, this is the first meta-analysis to examine the association of CS rates with  
40 types of insurance. A recently published meta-analysis found that the odds of delivery by CS  
41 was 1.41 higher in for-profit hospitals as compared with non-profit hospitals (95% CI 1.24 to  
42 1.60) (22). These findings were confirmed across subgroups (i.e. such as country, year, or  
43 study design) of studies in stratified analyses, indicating financial incentives may play an  
44 important role in such outcome (22). We found three other recent meta-analyses that  
45 summarized CS studies and found a strong association with obesity (41), Sub-Saharan Africa  
46 ethnic origin (42) and labour induction (43). Our estimates of a 14 percent increase are on the  
47 lower end of the strength of associations found in earlier studies.  
48  
49  
50  
51  
52  
53  
54  
55  
56  
57  
58  
59  
60

### *Strengths and limitations*

The major strengths of our meta-analysis include a broad literature search, screening and data extraction performed in duplicate, an exploration of study characteristics as a potential source of variation between studies, and sensitivity analyses involving studies that required exclusion due to overlapping populations. Major limitations are differences in the characteristics of the study populations, type of data used, types of CS analysed and variables used for adjustment in statistical analyses across studies. Unadjusted estimates of associations were larger, which suggests the presence of confounding, and we cannot completely rule out residual confounding in adjusted estimates.

### *Mechanisms*

Existing evidence points towards two possible causes for higher odds of CS in women insured privately: payment mechanisms of health insurance bodies and health care providers' responses to these mechanisms. Most insurers pay for higher volume of care through fee-for-service reimbursement (44, 45). Health insurers are known to reimburse hospitals and physicians at higher rates for CS (32) compared with vaginal delivery (34) and they can also differ in rates of reimbursement of CS (34). Multiple studies have shown that hospitals are motivated by and responsive to financial incentives (22, 32, 44, 46), although Grant (34) argues that their impact is small. One example is the financial benefit associated with longer hospital stays associated with CS (46, 47). Hospitals may incentivize physicians (44, 46) to align their clinical decision with institutional strategies, such as patient scheduling policies that steer patients with private insurance to more profit prone physicians (44, 46).

Physicians are known to be motivated by higher fees paid for CS as compared with vaginal delivery (46). They often act as self-interested economic agents according to economic models of physician behaviour, by maximizing income and convenience (32). Physicians are



1  
2  
3 also in a position to exploit asymmetry of information between them and patients (48, 49),  
4  
5 which leads to recommendations that are not always aligned with patient needs or preferences  
6  
7 (15). There is also evidence that physicians with higher numbers of privately insured patients  
8  
9 will tend to perform more CS (32, 34); explanations include perceptions that patients with  
10  
11 private insurance have a higher social class, or more prevalent concerns about malpractice  
12  
13 liability in patients with private insurance (50).  
14  
15

16  
17 The heterogeneity of adjusted estimates across states in the United States (Appendix 4) points  
18  
19 to setting specific factors that will influence the effect of insurance on the odds of CS and are  
20  
21 worth of further investigation. According to Burns et al., the lacking association in Arizona  
22  
23 (OR=1.02) may be due to equal magnitudes of re-imbursements of hospitals for vaginal birth  
24  
25 and CS (32). In Maryland (OR=0.96), the state administration introduced HealthChoice  
26  
27 Program in 1997, that was intended to provide prevention oriented healthcare services, enact  
28  
29 better accountability measures for managed care organizations, and ensure efficient use of  
30  
31 financial resources (36). This program introduced a mandatory managed care system for  
32  
33 Medicaid beneficiaries, which replaced a fee-for-service model. This resulted in more  
34  
35 patients receiving managed care irrespective of their insurance status and, in turn, use of  
36  
37 similar policies in patients with public and private insurance (36). We are unaware of  
38  
39 plausible explanations for the lack of associations observed in Michigan (OR 1.01) and Ohio  
40  
41 (OR 1.00).  
42  
43  
44  
45

#### 46 47 **Policy and research implications**

48  
49 Increases in the cost of care and hospital charges have become central issues in policy  
50  
51 discussion in the United States and elsewhere (15, 45). While the public health care costs are  
52  
53 reaching unsustainable levels, hospital charges can have alarming effects on patients (45). In  
54  
55  
56  
57  
58  
59  
60

1  
2  
3 addition, the potential negative clinical effects of CS on mothers and newborns have raised  
4  
5 concerns among clinicians, academics and policymakers alike (15).  
6  
7

8  
9 Recent studies and their media coverage and associated increase in public awareness of high  
10  
11 CS rates and changes in reimbursement policy have led to recent decreases of CS rates in  
12  
13 California (18). Our study provides additional evidence to support policy and advocacy  
14  
15 efforts that address escalating CS rates, in particular their association with financial  
16  
17 incentives. Effective policy measures often require context, country or state specific policy  
18  
19 analyses investigating particular insurance programmes. These setting specific analyses are  
20  
21 essential as incentives may differ across health care systems.  
22  
23

24  
25 As we analyse CS rates relation with health insurance schemes we need to be aware of  
26  
27 complexity of interaction of different determinants and their influence in CS rates. The  
28  
29 published literature has identified a number of determinants of CS rates which operate at  
30  
31 different levels of health care systems (macro, meso, and micro) (15). At the macro level of  
32  
33 national health systems, operate factors such as health financing system, social and political  
34  
35 context, legal regulations, general cultural and social norms and similar. At the meso level are  
36  
37 hospitals and health care facilities. Their ownership status, availability of resources and size  
38  
39 are known to influence CS rates (15, 22). Finally, at the micro level, we have clinical units  
40  
41 that provide care, medical staff and patients, which are characterised with all sorts of features  
42  
43 that can influence the decision for CS. For example, clinical unit staff composition, or  
44  
45 physician education, gender and experience, or mother preference, age and race, are all  
46  
47 known to determine the rates of CS (15).  
48  
49  
50

### 51 52 **Conclusion**

53  
54 This systematic review and meta-analysis indicates that CS are more likely to be performed  
55  
56 in privately insured women as compared to women with public health insurance coverage.  
57  
58  
59  
60

1  
2  
3  
4  
5  
6  
7  
8  
9  
10  
11  
12  
13  
14  
15  
16  
17  
18  
19  
20  
21  
22  
23  
24  
25  
26  
27  
28  
29  
30  
31  
32  
33  
34  
35  
36  
37  
38  
39  
40  
41  
42  
43  
44  
45  
46  
47  
48  
49  
50  
51  
52  
53  
54  
55  
56  
57  
58  
59  
60

Although this effect is small and variable across strata, it is present in all performed analysis.  
Review of setting-specific reimbursement policies will enable an understanding of  
influencing factors. Reforming reimbursement policies used by private and public insurers  
may lead to a reduction of CS rates to more appropriate levels (18, 22, 36, 51).

For peer review only

## Acknowledgments

### *Exclusive Licence*

*The Corresponding Author has the right to grant on behalf of all authors and does grant on behalf of all authors, an exclusive licence (or non-exclusive for government employees) on a worldwide basis to the BMJ Publishing Group Ltd and its Licensees to permit this article (if accepted) to be published in BMJ Open and any other BMJPGGL products to exploit all subsidiary rights, as set out in our licence <http://journals.bmj.com/site/authors/editorial-policies.xhtml#copyright> and the Corresponding Author accepts and understands that any supply made under these terms is made by BMJPGGL to the Corresponding Author. All articles published in BMJ Open will be made available on an Open Access basis (with authors being asked to pay an open access fee - see <http://bmjopen.bmj.com/site/about/resources.xhtml>) Access shall be governed by a Creative Commons licence – details as to which Creative Commons licence will apply to the article are set out in our licence referred to above.*

### *Contributorship Statement*

*IH, LS, DG, PJ conceived and designed the study. IH, LS, MB performed the data extraction and preparation. IH, LS, BdC, PJ analysed the data. IH, DG, PJ wrote the paper, which was critically reviewed and approved by all authors.*

### *Competing interests statement*

*All authors have completed the ICMJE uniform disclosure form at [www.icmje.org/coi\\_disclosure.pdf](http://www.icmje.org/coi_disclosure.pdf) and declare: no support from any organisation for the submitted work; no financial relationships with any organisations that might have an interest in the submitted work in the previous three years; no other relationships or activities that could appear to have influenced the submitted work.*

**Funding statement**

No funding was received to perform this study. All authors, had full access to all of the data (including statistical reports and tables) in the study and take responsibility for the integrity of the data and the accuracy of the data analysis.

**Data sharing statement**

No additional unpublished data are available from the study.

For peer review only

## References

1. Molina G, Weiser TG, Lipsitz SR, Esquivel MM, Uribe-Leitz T, Azad T, et al. Relationship Between Cesarean Delivery Rate and Maternal and Neonatal Mortality. *JAMA*. 2015;314(21):2263-70.
2. Vogel JP, Betran AP, Vindevoghel N, Souza JP, Torloni MR, Zhang J, et al. Use of the Robson classification to assess caesarean section trends in 21 countries: a secondary analysis of two WHO multicountry surveys. *Lancet Glob Health*. 2015;3(5):e260-70.
3. McPherson K, Gon G, Scott M. International Variations in a Selected Number of Surgical Procedures: OECD Publishing; 2013 [Available from: <http://dx.doi.org/10.1787/5k49h4p5g9mw-en>].
4. Bragg F, Cromwell DA, Edozien LC, Gurol-Urganci I, Mahmood TA, Templeton A, et al. Variation in rates of caesarean section among English NHS trusts after accounting for maternal and clinical risk: cross sectional study. *BMJ*. 2010;341:c5065.
5. Baicker K, Buckles KS, Chandra A. Geographic variation in the appropriate use of cesarean delivery. *Health Aff (Millwood)*. 2006;25(5):w355-67.
6. Hanley GE, Janssen PA, Greyson D. Regional variation in the cesarean delivery and assisted vaginal delivery rates. *Obstet Gynecol*. 2010;115(6):1201-8.
7. Feng XL, Xu L, Guo Y, Ronsmans C. Factors influencing rising caesarean section rates in China between 1988 and 2008. *Bull World Health Organ*. 2012;90(1):30-9, 9A.
8. Stephenson PA, Bakoula C, Hemminki E, Knudsen L, Levasseur M, Schenker J, et al. Patterns of use of obstetrical interventions in 12 countries. *Paediatr Perinat Epidemiol*. 1993;7(1):45-54.
9. Renwick MY. Caesarean section rates, Australia 1986: variations at state and small area level. *Aust N Z J Obstet Gynaecol*. 1991;31(4):299-304.

- 1  
2  
3 10. Brennan DJ, Robson MS, Murphy M, O'Herlihy C. Comparative analysis of  
4 international cesarean delivery rates using 10-group classification identifies significant  
5 variation in spontaneous labor. *Am J Obstet Gynecol.* 2009;201(3):308 e1-8.  
6  
7
- 8  
9 11. Festin MR, Laopaiboon M, Pattanittum P, Ewens MR, Henderson-Smart DJ,  
10 Crowther CA. Caesarean section in four South East Asian countries: reasons for, rates,  
11 associated care practices and health outcomes. *BMC Pregnancy Childbirth.* 2009;9:17.  
12  
13
- 14 12. Johnson N, Ansell D. Variation in caesarean and instrumental delivery rates in New  
15 Zealand hospitals. *Aust N Z J Obstet Gynaecol.* 1995;35(1):6-11.  
16  
17
- 18 13. Keskimaki I, Aro S, Teperi J. Regional variation in surgical procedure rates in  
19 Finland. *Scand J Soc Med.* 1994;22(2):132-8.  
20  
21
- 22 14. Knight M, Sullivan EA. Variation in caesarean delivery rates. *BMJ.* 2010;341:c5255.  
23  
24
- 25 15. Hoxha I, Busato A, Luta X. Medical Practice Variations in Reproductive, Obstetric,  
26 and Gynecological Care. In: Johnson A, Stukel AT, editors. *Medical Practice Variations.*  
27 Boston, MA: Springer US; 2016. p. 141-60.  
28  
29
- 30 16. Keeler EB, Brodie M. Economic incentives in the choice between vaginal delivery  
31 and cesarean section. *Milbank Q.* 1993;71(3):365-404.  
32  
33
- 34 17. Mossialos E, Allin S, Karras K, Davaki K. An investigation of Caesarean sections in  
35 three Greek hospitals: the impact of financial incentives and convenience. *Eur J Public*  
36 *Health.* 2005;15(3):288-95.  
37  
38
- 39 18. Grant D. Physician financial incentives and cesarean delivery: new conclusions from  
40 the healthcare cost and utilization project. *J Health Econ.* 2009;28(1):244-50.  
41  
42
- 43 19. Gregory KD, Korst LM, Platt LD. Variation in elective primary cesarean delivery by  
44 patient and hospital factors. *Am J Obstet Gynecol.* 2001;184(7):1521-32; discussion 32-4.  
45  
46  
47  
48  
49  
50  
51  
52  
53  
54  
55  
56  
57  
58  
59  
60

- 1  
2  
3 20. Koroukian SM, Bush D, Rimm AA. Comparison of cesarean section rates in fee-for-  
4 service versus managed care patients in the Ohio Medicaid population, 1992-1997. *The*  
5 *American journal of managed care*. 2001;7(2):134-42.  
6  
7  
8  
9  
10 21. Roberts CL, Tracy S, Peat B. Rates for obstetric intervention among private and  
11 public patients in Australia: population based descriptive study. *BMJ*. 2000;321(7254):137-  
12 41.  
13  
14  
15  
16 22. Hoxha I, Syrogiannouli L, Luta X, Tal K, Goodman DC, da Costa BR, et al.  
17 *Caesarean sections and for-profit status of hospitals: systematic review and meta-analysis*.  
18 *BMJ Open*. 2017;7(2):e013670.  
19  
20  
21  
22 23. DerSimonian R, Laird N. Meta-analysis in clinical trials. *Controlled clinical trials*.  
23 1986;7(3):177-88.  
24  
25  
26  
27 24. da Costa BR, Juni P. Systematic reviews and meta-analyses of randomized trials:  
28 principles and pitfalls. *Eur Heart J*. 2014;35(47):3336-45.  
29  
30  
31  
32 25. Coonrod DV, Drachman D, Hobson P, Manriquez M. Nulliparous term singleton  
33 vertex cesarean delivery rates: institutional and individual level predictors. *Am J Obstet*  
34 *Gynecol*. 2008;198(6):694 e1-11; discussion e11.  
35  
36  
37  
38 26. Huesch MD. Association between type of health insurance and elective cesarean  
39 deliveries: New Jersey, 2004-2007. *Am J Public Health*. 2011;101(11):e1-7.  
40  
41  
42  
43 27. Movsas TZ, Wells E, Mongoven A, Grigorescu V. Does medical insurance type  
44 (private vs public) influence the physician's decision to perform Caesarean delivery? *J Med*  
45 *Ethics*. 2012;38(8):470-3.  
46  
47  
48  
49 28. Henke RM, Wier LM, Marder WD, Friedman BS, Wong HS. Geographic variation in  
50 cesarean delivery in the United States by payer. *BMC Pregnancy Childbirth*. 2014;14:387.  
51  
52  
53  
54  
55  
56  
57  
58  
59  
60



- 1  
2  
3 29. Sebastiao YV, Womack L, Vamos CA, Louis JM, Olaoye F, Caragan T, et al.  
4  
5 Hospital variation in cesarean delivery rates: contribution of individual and hospital factors in  
6  
7 Florida. *Am J Obstet Gynecol*. 2016;214(1):123 e1- e18.  
8  
9  
10 30. Kozhimannil KB, Shippee TP, Adegoke O, Vemig BA. Trends in hospital-based  
11  
12 childbirth care: the role of health insurance. *The American journal of managed care*.  
13  
14 2013;19(4):e125-32.  
15  
16 31. Braveman P, Egerter S, Edmonston F, Verdon M. Racial/ethnic differences in the  
17  
18 likelihood of cesarean delivery, California. *American Journal of Public Health*.  
19  
20 1995;85(5):625-30.  
21  
22  
23 32. Burns LR, Geller SE, Wholey DR. The effect of physician factors on the cesarean  
24  
25 section decision. *Medical care*. 1995;33(4):365-82.  
26  
27  
28 33. Aron DC, Gordon HS, DiGiuseppe DL, Harper DL, Rosenthal GE. Variations in risk-  
29  
30 adjusted cesarean delivery rates according to race and health insurance. *Med Care*.  
31  
32 2000;38(1):35-44.  
33  
34 34. Grant D. Explaining source of payment differences in U.S. cesarean rates: why do  
35  
36 privately insured mothers receive more cesareans than mothers who are not privately insured?  
37  
38 *Health Care Manag Sci*. 2005;8(1):5-17.  
39  
40  
41 35. Korst LM, Gornbein JA, Gregory KD. Rethinking the cesarean rate: how pregnancy  
42  
43 complications may affect interhospital comparisons. *Med Care*. 2005;43(3):237-45.  
44  
45  
46 36. Misra A. Impact of the HealthChoice program on cesarean section and vaginal birth  
47  
48 after C-section deliveries: a retrospective analysis. *Matern Child Health J*. 2008;12(2):266-  
49  
50 74.  
51  
52 37. Huesch MD, Currid-Halkett E, Doctor JN. Measurement and risk adjustment of  
53  
54 prelabor cesarean rates in a large sample of California hospitals. *Am J Obstet Gynecol*.  
55  
56 2014;210(5):443 e1-17.  
57  
58  
59  
60

- 1  
2  
3 38. Lutomski JE, Murphy M, Devane D, Meaney S, Greene RA. Private health care  
4 coverage and increased risk of obstetric intervention. *BMC Pregnancy Childbirth*.  
5  
6 2014;14:13.  
7  
8  
9 39. Bannister-Tyrrell M, Patterson JA, Ford JB, Morris JM, Nicholl MC, Roberts CL.  
10 Variation in hospital caesarean section rates for preterm births. *Aust N Z J Obstet Gynaecol*.  
11  
12 2015;55(4):350-6.  
13  
14 40. Sentell T, Chang A, Ahn HJ, Miyamura J. Maternal language and adverse birth  
15 outcomes in a statewide analysis. *Women & health*. 2016;56(3):257-80.  
16  
17  
18 41. Poobalan AS, Aucott LS, Gurung T, Smith WC, Bhattacharya S. Obesity as an  
19 independent risk factor for elective and emergency caesarean delivery in nulliparous women-  
20 -systematic review and meta-analysis of cohort studies. *Obes Rev*. 2009;10(1):28-35.  
21  
22  
23 42. Merry L, Small R, Blondel B, Gagnon AJ. International migration and caesarean  
24 birth: a systematic review and meta-analysis. *BMC Pregnancy Childbirth*. 2013;13:27.  
25  
26  
27 43. Mishanina E, Rogozinska E, Thatthi T, Uddin-Khan R, Khan KS, Meads C. Use of  
28 labour induction and risk of cesarean delivery: a systematic review and meta-analysis. *CMAJ*.  
29  
30 2014;186(9):665-73.  
31  
32  
33 44. Stafford RS. Cesarean section use and source of payment: An analysis of California  
34 hospital discharge abstracts. *American Journal of Public Health*. 1990;80(3):313-5.  
35  
36  
37 45. Hsia RY, Akosa Antwi Y, Weber E. Analysis of variation in charges and prices paid  
38 for vaginal and caesarean section births: a cross-sectional study. *BMJ Open*.  
39  
40 2014;4(1):e004017.  
41  
42  
43 46. Bertollini R, DiLallo D, Spadea T, Perucci C. Cesarean section rates in Italy by  
44 hospital payment mode: an analysis based on birth certificates. *Am J Public Health*.  
45  
46 1992;82(2):257-61.  
47  
48  
49  
50  
51  
52  
53  
54  
55  
56  
57  
58  
59  
60

- 1  
2  
3 47. de Jong JD, Westert GP, Noetscher CM, Groenewegen PP. Does managed care make  
4 a difference? Physicians' length of stay decisions under managed and non-managed care.  
5 BMC Health Serv Res. 2004;4(1):3.  
6  
7  
8  
9  
10 48. Wagstaff A. The demand for health: some new empirical evidence. J Health Econ.  
11 1986;5(3):195-233.  
12  
13  
14 49. Wagstaff A. The demand for health: theory and applications. J Epidemiol Community  
15 Health. 1986;40(1):1-11.  
16  
17  
18 50. Haas JS, Udvarhelyi S, Epstein AM. The effect of health coverage for uninsured  
19 pregnant women on maternal health and the use of cesarean section. JAMA. 1993;270(1):61-  
20 4.  
21  
22  
23  
24  
25 51. Brown JR, Sox HC, Goodman DC. Financial incentives to improve quality: skating to  
26 the puck or avoiding the penalty box? JAMA. 2014;311(10):1009-10.  
27  
28  
29  
30  
31  
32  
33  
34  
35  
36  
37  
38  
39  
40  
41  
42  
43  
44  
45  
46  
47  
48  
49  
50  
51  
52  
53  
54  
55  
56  
57  
58  
59  
60

Table 1. Characteristics of included studies

| Author          | Year | Country       | Study design         | Number of cases | Number of hospital units | Year of data collection | Population                                      | Sampling    | Type of CS analysed |
|-----------------|------|---------------|----------------------|-----------------|--------------------------|-------------------------|-------------------------------------------------|-------------|---------------------|
| Stafford        | 1990 | United States | Cross sectional      | 461066          | Not reported             | 1986                    | Primi- and multiparae; any risk                 | Consecutive | Any                 |
| Haas et al. A   | 1993 | United States | Cross sectional      | 57257           | Not reported             | 1984                    | Primi- and multiparae; any risk                 | Consecutive | Any                 |
| Haas et al. B   | 1993 | United States | Cross sectional      | 64346           | Not reported             | 1987                    | Primi- and multiparae; any risk                 | Consecutive | Any                 |
| Braveman et al. | 1995 | United States | Retrospective cohort | 213761          | Unclear                  | 1991                    | Primiparae; no previous CS; any risk            | Consecutive | Any                 |
| Burns et al.    | 1995 | United States | Cross sectional      | 33233           | 36                       | 1989                    | Primi- and multiparae; any risk                 | Consecutive | Any                 |
| Aron et al.     | 2000 | United States | Retrospective cohort | 25697           | 21                       | 1993-1995               | Primiparae; no previous CS; any risk            | Consecutive | Any                 |
| Grant A         | 2005 | United States | Cross sectional      | 9017            | n/a                      | 1988                    | Primi- and multiparae; any risk                 | Random      | Any                 |
| Grant B         | 2005 | United States | Cross sectional      | 147821          | n/a                      | 1992                    | Primi- and multiparae; any risk                 | Consecutive | Any                 |
| Grant C         | 2005 | United States | Cross sectional      | 136763          | n/a                      | 1995                    | Primi- and multiparae; any risk                 | Consecutive | Any                 |
| Korst et al.    | 2005 | United States | Cross sectional      | 327632          | 288                      | 1995                    | Primi- and multiparae; no previous CS; any risk | Consecutive | During labour       |
| Misra           | 2008 | United States | Cross sectional      | 128743          | Not reported             | 1995, 2000              | Primi- and multiparae; no previous CS; any risk | Consecutive | During labour       |
| Coonrod et al.  | 2008 | United States | Cross sectional      | 28863           | 40                       | 2005                    | Primiparae; low risk                            | Consecutive | Any                 |
| Huesch          | 2011 | United States | Cross sectional      | 182108          | Not reported             | 2004-2007               | Primi- and multiparae; no previous CS; low risk | Consecutive | Before labour       |

1  
2  
3  
4  
5  
6  
7  
8  
9  
10  
11  
12  
13  
14  
15  
16  
17  
18  
19  
20  
21  
22  
23  
24  
25  
26  
27  
28  
29  
30  
31  
32  
33  
34  
35  
36  
37  
38  
39  
40  
41  
42  
43  
44  
45  
46  
47  
48  
49

|                          |      |               |                      |         |              |           |                                                 |             |               |
|--------------------------|------|---------------|----------------------|---------|--------------|-----------|-------------------------------------------------|-------------|---------------|
| Movsas et al.            | 2012 | United States | Retrospective cohort | 617269  | NA           | 2004-2008 | Primi- and multiparae; any risk                 | Consecutive | Any           |
| Kozhimannil et al.       | 2013 | United States | Cross sectional      | 6717486 | Over 1000    | 2002-2009 | Primi- and multiparae; any risk                 | Random      | Any           |
| Lutomski et al.          | 2014 | Ireland       | Retrospective cohort | 403642  | 19           | 2005-2010 | Primi- and multiparae; any risk                 | Consecutive | Any           |
| Huesch et al.            | 2014 | United States | Cross sectional      | 408355  | 254          | 2010      | Primi- and multiparae; no previous CS; any risk | Consecutive | Before labour |
| Henke et al.             | 2014 | United States | Cross sectional      | 2516570 | Not reported | 2009      | Primi- and multiparae; no previous CS; low risk | Consecutive | Any           |
| Bannister-Tyrrell et al. | 2015 | Australia     | Cross sectional      | 20247   | 51           | 2007-2011 | Primi- and multiparae; high risk                | Consecutive | Any           |
| Sebastião et al.         | 2016 | United States | Retrospective cohort | 412192  | 122          | 2004-2011 | Primiparae; no previous CS; low risk            | Consecutive | During labour |
| Sentell et al.           | 2016 | United States | Cross sectional      | 11419   | 4            | 2012      | Primi- and multiparae; any risk                 | Consecutive | Any           |

CS = caesarean section

Peer review only

## Figure legends

Figure 1. The flow diagram of review

Figure 2. Adjusted odds ratios of caesarean section

Figure 3. Stratified analyses/Legend: \*P for trend

Figure 4. Crude odds ratios of caesarean section

## Supporting information

S1 - Appendix 1. Reported exclusion criteria

S2 - Appendix 2. Characteristics of data used for analysis

S3 - Appendix 3. Covariates used for statistical adjustment

S4 - Appendix 4. Caesarean section rates in United States

S5 - Appendix 5. Sensitivity analysis - Adjusted odds ratios of caesarean section

S6 - Appendix 6. Sensitivity analysis – stratified analyses/Legend: \*P for trend

S7 - Appendix 7. Sensitivity analysis - Crude odds ratios of caesarean section

S8 – Appendix 8. Search strategy

S9 – Appendix 9. PRISMA checklist

S10 – Appendix 10. Research Checklist

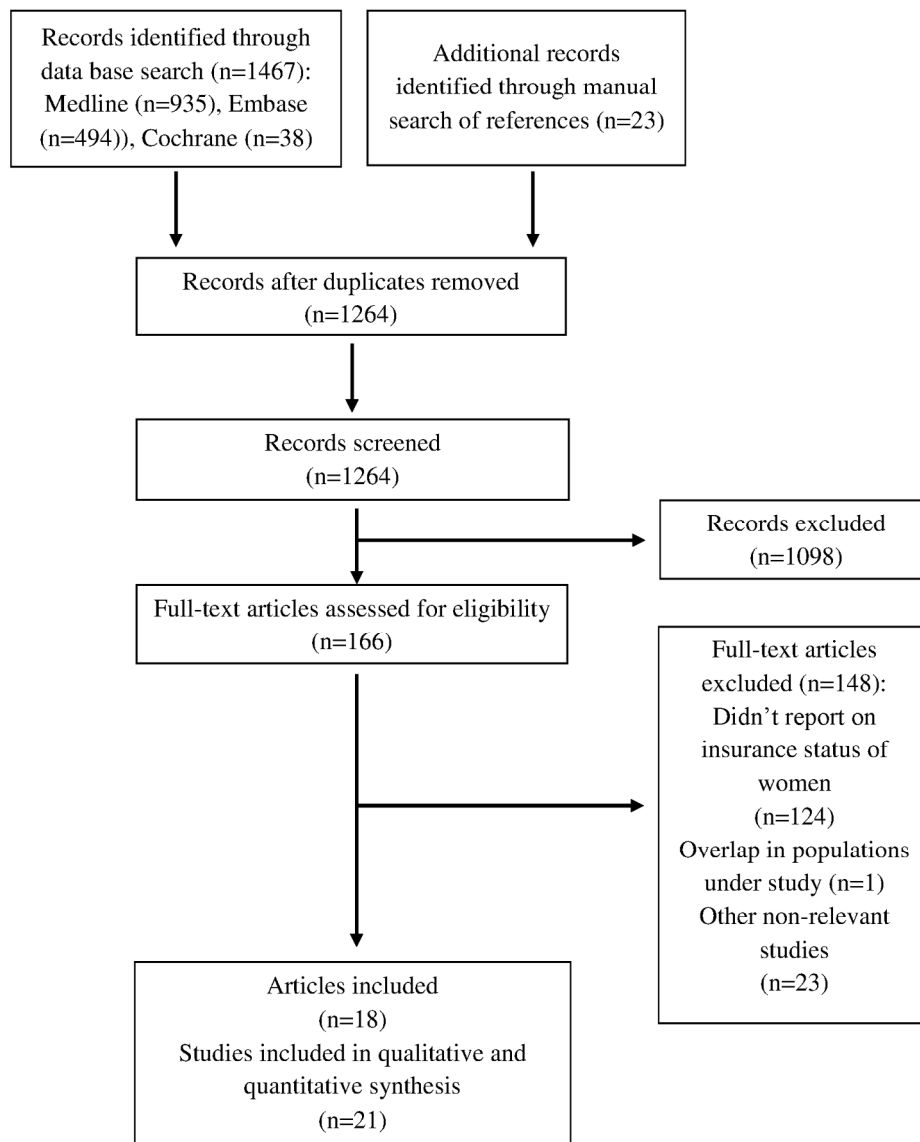

Figure 1. The flow diagram of review

164x201mm (300 x 300 DPI)

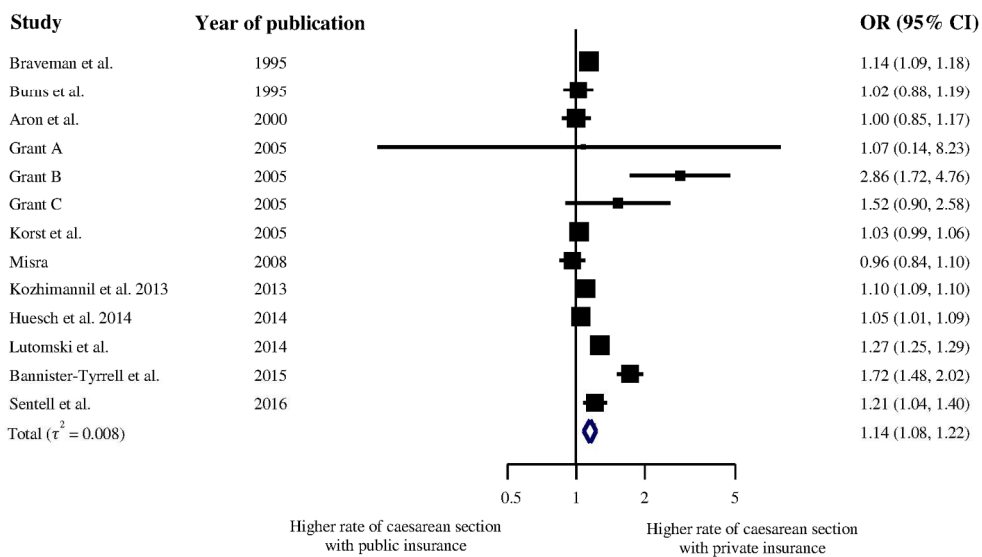

Figure 2. Adjusted odds ratios of caesarean section

171x98mm (300 x 300 DPI)

Review only



1  
2  
3  
4  
5  
6  
7  
8  
9  
10  
11  
12  
13  
14  
15  
16  
17  
18  
19  
20  
21  
22  
23  
24  
25  
26  
27  
28  
29  
30  
31  
32  
33  
34  
35  
36  
37  
38  
39  
40  
41  
42  
43  
44  
45  
46  
47  
48  
49  
50  
51  
52  
53  
54  
55  
56  
57  
58  
59  
60

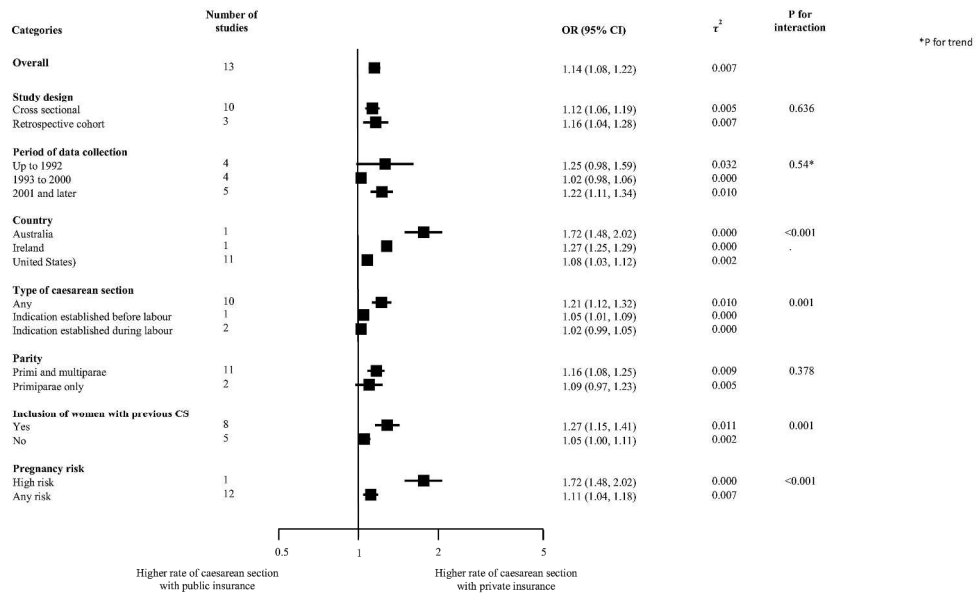

Figure 3. Stratified analyses/Legend: \*P for trend

255x158mm (300 x 300 DPI)

Review only

1  
2  
3  
4  
5  
6  
7  
8  
9  
10  
11  
12  
13  
14  
15  
16  
17  
18  
19  
20  
21  
22  
23  
24  
25  
26  
27  
28  
29  
30  
31  
32  
33  
34  
35  
36  
37  
38  
39  
40  
41  
42  
43  
44  
45  
46  
47  
48  
49  
50  
51  
52  
53  
54  
55  
56  
57  
58  
59  
60

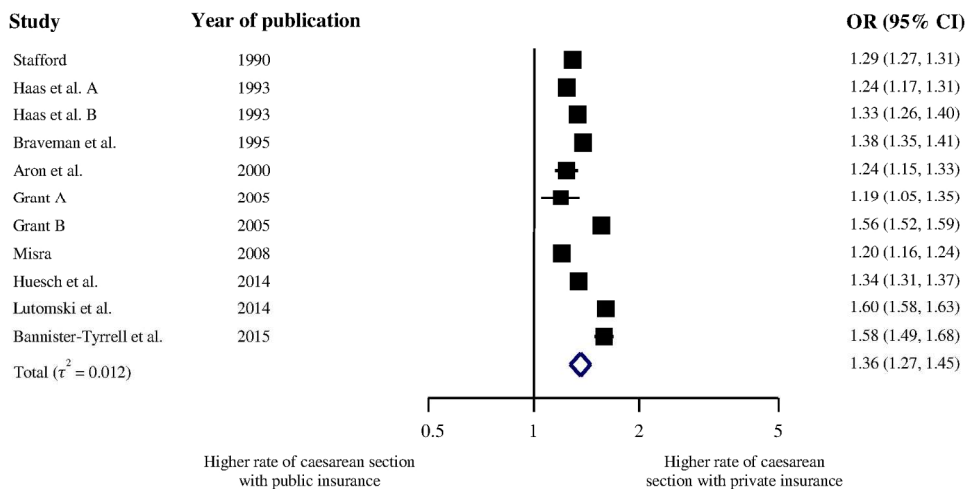

Figure 4. Crude odds ratios of caesarean section

171x87mm (300 x 300 DPI)

review only



## Appendix 2. Characteristics of data used for analysis

| Author                   | Year | Survey | Hospital records | Birth certificates/registry | Census data |
|--------------------------|------|--------|------------------|-----------------------------|-------------|
| Stafford                 | 1990 |        | +                |                             |             |
| Haas et al. A            | 1993 |        | +                | +                           |             |
| Haas et al. B            | 1993 |        | +                | +                           |             |
| Braveman et al.          | 1995 |        |                  | +                           | +           |
| Burns et al.             | 1995 |        | +                | +                           |             |
| Aron et al.              | 2000 |        | +                |                             |             |
| Grant A                  | 2005 | +      |                  |                             |             |
| Grant B                  | 2005 |        | +                |                             |             |
| Grant C                  | 2005 |        | +                |                             |             |
| Korst et al.             | 2005 |        | +                |                             |             |
| Misra                    | 2008 |        | +                |                             |             |
| Coonrod et al.           | 2008 |        |                  | +                           |             |
| Huesch                   | 2011 |        | +                |                             |             |
| Movsas et al.            | 2012 |        | +                | +                           |             |
| Kozhimannil et al.       | 2013 |        | +                |                             |             |
| Lutomski et al.          | 2014 |        | +                |                             |             |
| Huesch et al.            | 2014 |        | +                |                             |             |
| Henke et al.             | 2014 |        | +                |                             |             |
| Bannister-Tyrrell et al. | 2015 |        | +                |                             |             |
| Sebastião et al.         | 2016 |        | +                | +                           |             |
| Sentell et al.           | 2016 |        | +                |                             |             |

Appendix 3. Covariates used for statistical adjustment

| Author                   | Year | Maternal preconception status |                   |                |                 |                   |              |        | Maternal clinical status |                 |     |        | Foetus characteristics     |                                            |                                       |                 | Total number of covariates |              |                       |               |                       |                          |                 |    |
|--------------------------|------|-------------------------------|-------------------|----------------|-----------------|-------------------|--------------|--------|--------------------------|-----------------|-----|--------|----------------------------|--------------------------------------------|---------------------------------------|-----------------|----------------------------|--------------|-----------------------|---------------|-----------------------|--------------------------|-----------------|----|
|                          |      | Ethnicity/Race                | Educational level | Marital status | Economic status | Insurances status | Urban status | Weight | Height                   | Body mass index | Age | Parity | Previous caesarean section | Pre-existing (before pregnancy) conditions | Conditions developed during pregnancy | Gestational age |                            | Birth weight | Other characteristics | Prenatal care | Birth characteristics | Provider characteristics | Other variables |    |
| Stafford*                | 1990 |                               |                   |                |                 |                   |              |        |                          |                 |     |        |                            |                                            |                                       |                 |                            |              |                       |               |                       |                          | 0               |    |
| Haas et al. A*           | 1993 |                               |                   |                |                 |                   |              |        |                          |                 |     |        |                            |                                            |                                       |                 |                            |              |                       |               |                       |                          |                 | 0  |
| Haas et al. B*           | 1993 |                               |                   |                |                 |                   |              |        |                          |                 |     |        |                            |                                            |                                       |                 |                            |              |                       |               |                       |                          |                 | 0  |
| Braveman et al.          | 1995 | +                             | +                 | +              | +               | +                 |              |        |                          | +               |     |        |                            | +                                          |                                       |                 | +                          | +            | +                     | +             | ++                    | +                        | 15              |    |
| Burns et al.             | 1995 | +                             | +                 |                |                 |                   |              |        |                          |                 | +   | +      | +                          |                                            | ++                                    | ++              | +                          | +            | ++                    | +             |                       | ++                       | ++              | 33 |
| Aron et al.              | 2000 |                               |                   |                |                 |                   |              |        |                          |                 | +   | +      |                            | ++                                         | ++                                    | ++              | +                          | ++           | ++                    |               |                       |                          | 39              |    |
| Grant A                  | 2005 | ++                            | +                 | +              | +               |                   | +            | +      | +                        | ++              |     | +      | ++                         | ++                                         | +                                     | ++              | ++                         | ++           |                       |               | ++                    | ++                       | 68              |    |
| Grant B                  | 2005 | ++                            |                   |                |                 |                   | +            |        |                          | ++              |     | +      | ++                         | ++                                         | +                                     | ++              | ++                         | +            |                       |               | ++                    | +                        | 31              |    |
| Grant C                  | 2005 | ++                            |                   |                |                 |                   | +            |        |                          | ++              |     | +      | ++                         | ++                                         | +                                     | ++              | ++                         | +            |                       |               | ++                    | +                        | 31              |    |
| Korst et al.             | 2005 | +                             |                   |                |                 |                   |              |        |                          | +               |     |        |                            | ++                                         | ++                                    | +               | +                          | +            | +                     |               | ++                    | ++                       | 6               |    |
| Misra                    | 2008 | +                             |                   |                |                 |                   |              |        |                          | ++              |     |        | ++                         | ++                                         |                                       |                 | ++                         |              |                       | +             | ++                    | ++                       | 30              |    |
| Coonrod et al.           | 2008 | +                             | +                 |                |                 |                   |              |        |                          | +               |     |        | ++                         | +                                          | +                                     | +               | +                          | +            | +                     | +             | ++                    | ++                       | 20              |    |
| Huesch                   | 2011 | +                             |                   | +              |                 |                   | +            |        |                          | +               |     |        |                            |                                            |                                       |                 |                            |              |                       |               | +                     | ++                       | 8               |    |
| Movsas et al.            | 2012 | +                             |                   |                |                 |                   |              |        |                          | +               | +   |        | +                          |                                            | +                                     | +               | +                          |              |                       |               | +                     | +                        | 9               |    |
| Kozhimannil et al.       | 2013 | +                             |                   |                |                 |                   |              |        |                          | +               | +   | +      | ++                         | ++                                         | +                                     | +               | ++                         |              |                       |               | ++                    |                          | 16              |    |
| Lutomski et al.          | 2014 |                               |                   |                |                 |                   |              |        |                          | +               |     | +      | ++                         | +                                          |                                       | +               | +                          |              |                       |               |                       |                          | 6               |    |
| Huesch et al.            | 2014 | +                             |                   |                | +               |                   |              |        |                          | +               |     |        | ++                         | ++                                         | +                                     | +               | ++                         | +            | ++                    | ++            | ++                    | ++                       | 124             |    |
| Henke et al.             | 2014 | +                             | +                 |                | +               |                   |              |        |                          | +               |     |        | ++                         | ++                                         |                                       | +               | +                          |              |                       |               | ++                    | ++                       | 28              |    |
| Bannister-Tyrrell et al. | 2015 |                               |                   |                |                 |                   |              |        |                          |                 | +   | +      | ++                         | ++                                         | +                                     | +               | +                          |              |                       | ++            | +                     | +                        | 12              |    |
| Sebastião et al.         | 2016 | +                             |                   | +              |                 |                   |              |        | +                        | +               |     |        |                            | +                                          |                                       | +               |                            |              |                       | +             | ++                    | ++                       | 10              |    |
| Sentell et al.           | 2016 | +                             |                   |                |                 |                   |              |        |                          | +               | +   |        |                            | +                                          |                                       |                 |                            |              |                       |               | +                     | +                        | 6               |    |

+ One covariate adjusted for    ++ Two or more covariates adjusted for  
 \*Stafford and Haas et al. only reported crude estimates.

Appendix 4. Caesarean section rates in United States

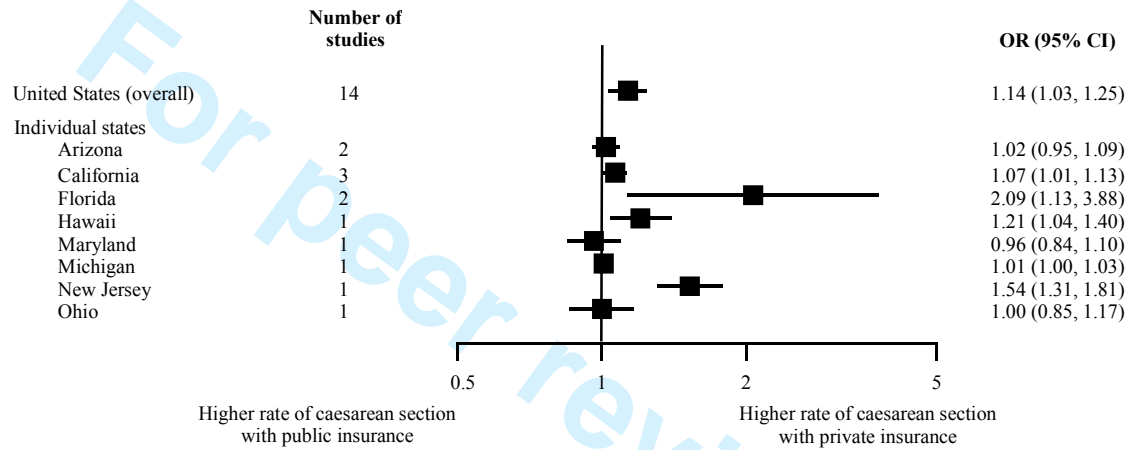

### Appendix 5. Sensitivity analysis - Adjusted odds ratios of caesarean section

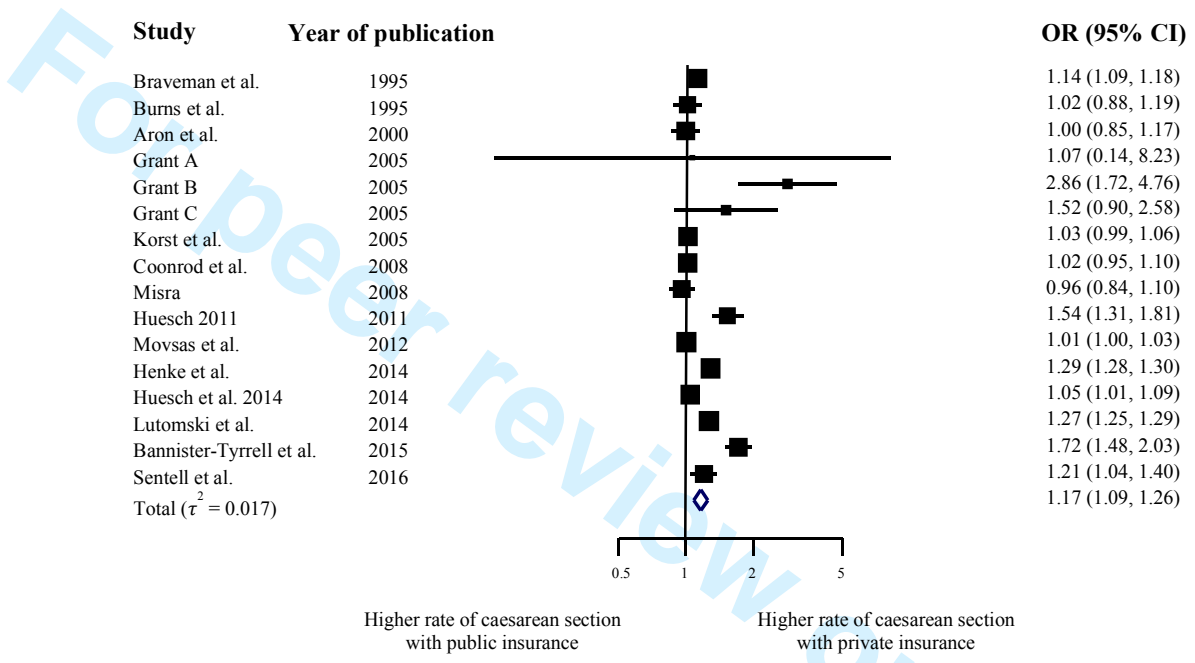

Appendix 6. Sensitivity analysis – stratified analyses

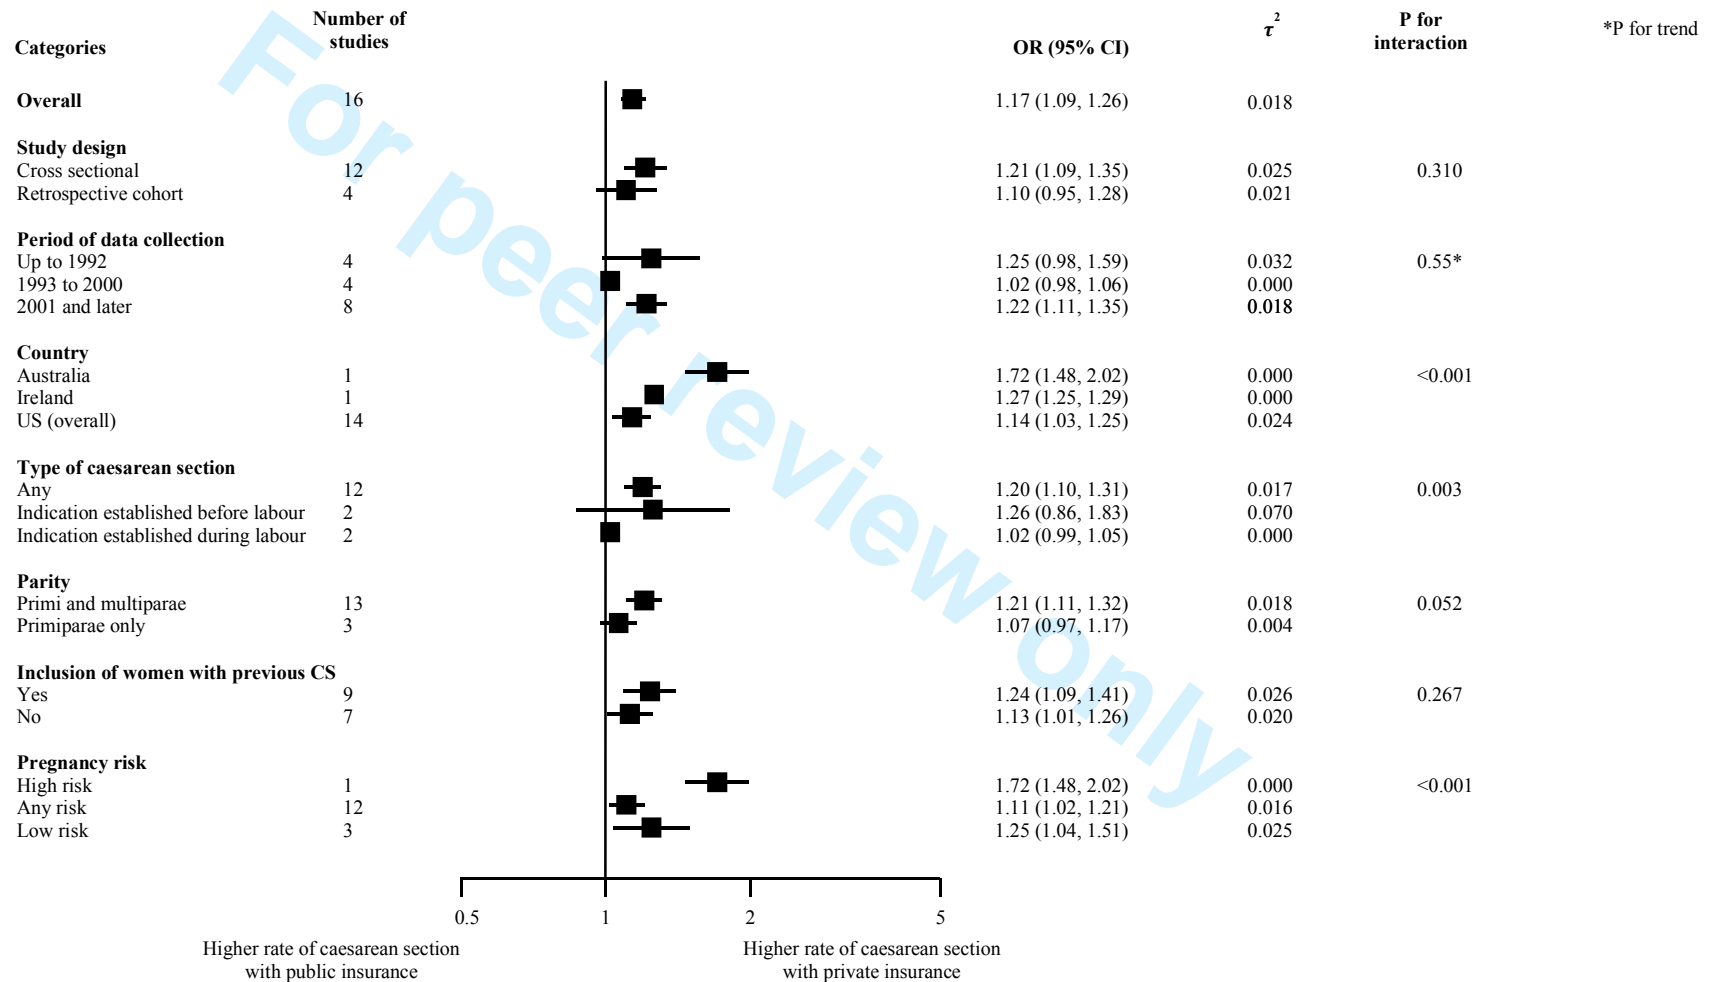



### Appendix 7. Sensitivity analysis - Crude odds ratios of caesarean section

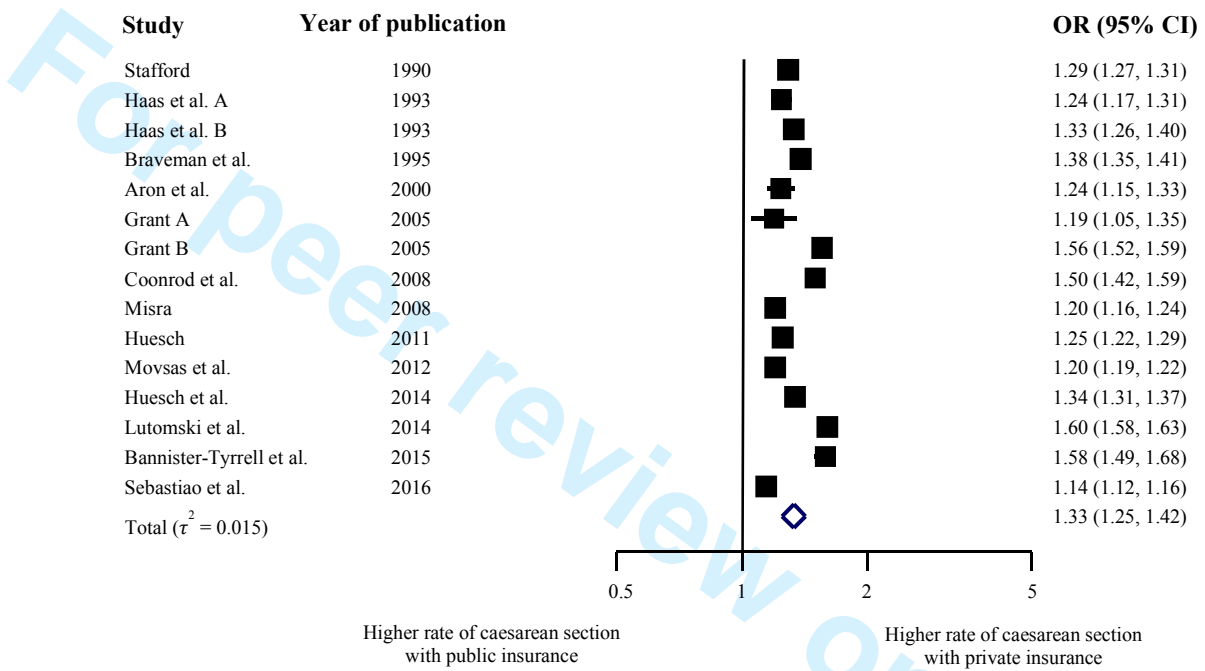

1  
2  
3  
4  
5  
6  
7  
8  
9  
10  
11  
12  
13  
14  
15  
16  
17  
18  
19  
20  
21  
22  
23  
24  
25  
26  
27  
28  
29  
30  
31  
32  
33  
34  
35  
36  
37  
38  
39  
40  
41  
42  
43  
44  
45  
46  
47  
48  
49

# Search Strategy

## 1. For Medline (PubMed)

(((((((causes OR determinants OR statistics OR rates OR factors OR decision\* OR physician\* OR socioeconomic OR state medicine OR evidence-based OR hospital OR hospitals OR hospitalization OR hospitalized OR uncertain\* OR educational status OR social class OR obstetric\* OR gynecolog\* OR supply OR distribut\* OR utilization OR insurance OR choice OR attitude OR patient OR economics OR maternal OR accessib\* OR health service\* OR rural population OR urban population[Title/Abstract])) NOT medline[sb])) OR ("Decision Making"[Mesh] OR "Physician's Practice Patterns"[Mesh] OR "Socioeconomic Factors"[Mesh] OR "State Medicine"[Mesh] OR "Evidence-Based Medicine"[Mesh] OR "Hospitals"[Mesh] OR "Uncertainty"[Mesh] OR "Educational Status"[Mesh] OR "Hospital Costs"[Mesh] OR "Physician Incentive Plans"[Mesh] OR "Social Class"[Mesh] OR "Obstetrics and Gynecology Department, Hospital"[Mesh] OR "supply and distribution"[Subheading] OR "utilization"[Subheading] OR "Insurance"[Mesh] OR "Choice Behavior"[Mesh] OR "Attitude to Health"[Mesh] OR "Patient Participation"[Mesh] OR "Physician-Patient Relations"[Mesh] OR "Economics, Hospital"[Mesh] OR "Maternal Health Services"[Mesh] OR "Health Services Accessibility"[Mesh] OR "Health Services Research"[Mesh] OR "Rural Population"[Mesh] OR "Urban Population"[Mesh]))) OR factors OR rates OR statistics OR causes OR determinants AND (((((operative delivery OR caesarean section OR cesarean section OR c-section OR c section OR caesarean OR cesarean OR caesarean delivery OR cesarean delivery OR caesarean rates OR cesarean rates)))) OR cesarean section [MeSH Terms])) AND (((("Catchment Area (Health)"[Mesh] OR "Small-Area Analysis"[Mesh]))) OR (((small area analysis OR small area analyses OR medical practice variation OR regions OR geographic variation OR variation))))))

## 2. Embase (Ovid SP)

| # ▲                                                                                                                                        | Searches                                                                                | Results | Search Type | Actions                               |
|--------------------------------------------------------------------------------------------------------------------------------------------|-----------------------------------------------------------------------------------------|---------|-------------|---------------------------------------|
| 1                                                                                                                                          | decision making/                                                                        | 134077  | Advanced    | Display <a href="#">More &gt;&gt;</a> |
| 2                                                                                                                                          | professional practice/ or group practice/ or health care practice/ or medical practice/ | 129049  | Advanced    | Display <a href="#">More &gt;&gt;</a> |
| 3                                                                                                                                          | socioeconomics/                                                                         | 110558  | Advanced    | Display <a href="#">More &gt;&gt;</a> |
| 4                                                                                                                                          | state medicine.mp. or national health service/                                          | 54605   | Advanced    | Display <a href="#">More &gt;&gt;</a> |
| 5                                                                                                                                          | evidence based medicine/                                                                | 80825   | Advanced    | Display <a href="#">More &gt;&gt;</a> |
| 6                                                                                                                                          | hospital/                                                                               | 216188  | Advanced    | Display <a href="#">More &gt;&gt;</a> |
| 7                                                                                                                                          | uncertainty/                                                                            | 6158    | Advanced    | Display <a href="#">More &gt;&gt;</a> |
| 8                                                                                                                                          | educational status/                                                                     | 36032   | Advanced    | Display <a href="#">More &gt;&gt;</a> |
| 9                                                                                                                                          | "hospital cost"/                                                                        | 13192   | Advanced    | Display <a href="#">More &gt;&gt;</a> |
| 10                                                                                                                                         | physician incentive plans.mp. or personnel management/                                  | 49572   | Advanced    | Display <a href="#">More &gt;&gt;</a> |
| 11                                                                                                                                         | social class/                                                                           | 26291   | Advanced    | Display <a href="#">More &gt;&gt;</a> |
| 12                                                                                                                                         | hospital department/                                                                    | 21809   | Advanced    | Display <a href="#">More &gt;&gt;</a> |
| 13                                                                                                                                         | obstetrics/                                                                             | 27326   | Advanced    | Display <a href="#">More &gt;&gt;</a> |
| 14                                                                                                                                         | gynecology/                                                                             | 29917   | Advanced    | Display <a href="#">More &gt;&gt;</a> |
| For peer review only - <a href="http://bmjopen.bmj.com/site/about/guidelines.xhtml">http://bmjopen.bmj.com/site/about/guidelines.xhtml</a> |                                                                                         |         |             |                                       |

|    |                                                                                                                                                                                                            |         |          |                             |
|----|------------------------------------------------------------------------------------------------------------------------------------------------------------------------------------------------------------|---------|----------|-----------------------------|
| 16 | 12 and 15                                                                                                                                                                                                  | 413     | Advanced | Display<br>More »           |
| 17 | health care distribution/                                                                                                                                                                                  | 2333    | Advanced | Display<br>More »           |
| 18 | health care utilization/                                                                                                                                                                                   | 36879   | Advanced | Display<br>More »           |
| 19 | insurance/                                                                                                                                                                                                 | 33934   | Advanced | Display<br>More »           |
| 20 | choice behavior.mp.                                                                                                                                                                                        | 765     | Advanced | Display<br>More »           |
| 21 | attitude to health/                                                                                                                                                                                        | 81021   | Advanced | Display<br>More »           |
| 22 | patient participation/                                                                                                                                                                                     | 16400   | Advanced | Display<br>More »           |
| 23 | doctor patient relation/                                                                                                                                                                                   | 81043   | Advanced | Display<br>More »           |
| 24 | health economics/                                                                                                                                                                                          | 33098   | Advanced | Display<br>More »           |
| 25 | obstetric procedure/                                                                                                                                                                                       | 550     | Advanced | Display<br>More »           |
| 26 | health care access/                                                                                                                                                                                        | 34433   | Advanced | Display<br>More »           |
| 27 | health services research/                                                                                                                                                                                  | 27579   | Advanced | Display<br>More »           |
| 28 | geographic distribution/                                                                                                                                                                                   | 132846  | Advanced | Display<br>More »           |
| 29 | rural population/                                                                                                                                                                                          | 30219   | Advanced | Display<br>More »           |
| 30 | urban population/                                                                                                                                                                                          | 35323   | Advanced | Display<br>More »           |
| 31 | causes/                                                                                                                                                                                                    | 0       | Advanced | Delete<br>More »            |
| 32 | determinants/                                                                                                                                                                                              | 1       | Advanced | Display<br>More »           |
| 33 | statistics/                                                                                                                                                                                                | 301146  | Advanced | Display<br>More »           |
| 34 | rates/                                                                                                                                                                                                     | 0       | Advanced | Delete<br>More »            |
| 35 | factors/                                                                                                                                                                                                   | 0       | Advanced | Delete<br>More »            |
| 36 | 1 or 2 or 3 or 4 or 5 or 6 or 7 or 8 or 9 or 10 or 11 or 16 or 17 or 18 or 19 or 20 or 21 or 22 or 23 or 24 or 25 or 26 or 27 or 29 or 30 or 32 or 33                                                      | 1340916 | Advanced | Display<br>More »           |
| 37 | cesarean section/                                                                                                                                                                                          | 59755   | Advanced | Display<br>More »           |
| 38 | (caesarean section or cesarean section or c-section or c section or caesarean or cesarean or caesarean delivery or cesarean delivery or caesarean rates or cesarean rates or operative delivery).ti,ab,tw. | 53950   | Advanced | Display<br>Delete<br>More » |
| 39 | 37 or 38                                                                                                                                                                                                   | 73014   | Advanced | Display<br>More »           |
| 40 | (small area analysis or small area analyses or small area or medical practice variation or regions or geographic variation or variation or variations).ti,ab,tw.                                           | 964890  | Advanced | Display<br>More »           |
| 41 | 28 or 40                                                                                                                                                                                                   | 1082827 | Advanced | Display<br>More »           |
| 42 | 36 and 39 and 41                                                                                                                                                                                           | 357     | Advanced | Display<br>More »           |

### 3. Cochrane Library

Caesarean section and insurance

## Appendix 9 - PRISMA checklist

|                           |   |                                                                                                                                                                                                                                                                                                             |                                       |
|---------------------------|---|-------------------------------------------------------------------------------------------------------------------------------------------------------------------------------------------------------------------------------------------------------------------------------------------------------------|---------------------------------------|
|                           |   |                                                                                                                                                                                                                                                                                                             |                                       |
| <b>TITLE</b>              |   |                                                                                                                                                                                                                                                                                                             |                                       |
| Title                     | 1 | Identify the report as a systematic review, meta-analysis, or both.                                                                                                                                                                                                                                         | Page 1, 2                             |
| <b>ABSTRACT</b>           |   |                                                                                                                                                                                                                                                                                                             |                                       |
| Structured summary        | 2 | Provide a structured summary including, as applicable: background; objectives; data sources; study eligibility criteria, participants, and interventions; study appraisal and synthesis methods; results; limitations; conclusions and implications of key findings; systematic review registration number. | Page 2,3                              |
| <b>INTRODUCTION</b>       |   |                                                                                                                                                                                                                                                                                                             |                                       |
| Rationale                 | 3 | Describe the rationale for the review in the context of what is already known.                                                                                                                                                                                                                              | Page 4                                |
| Objectives                | 4 | Provide an explicit statement of questions being addressed with reference to participants, interventions, comparisons, outcomes, and study design (PICOS).                                                                                                                                                  | Page 4,5                              |
| <b>METHODS</b>            |   |                                                                                                                                                                                                                                                                                                             |                                       |
| Protocol and registration | 5 | Indicate if a review protocol exists, if and where it can be accessed (e.g., Web address), and, if available, provide registration information including registration number.                                                                                                                               | No published protocol or registration |
| Eligibility criteria      | 6 | Specify study characteristics (e.g., PICOS, length of follow-up) and report characteristics (e.g., years considered, language, publication status) used as criteria for eligibility, giving rationale.                                                                                                      | Page 4,5                              |
| Information sources       | 7 | Describe all information sources (e.g., databases with dates of coverage, contact with study authors to identify additional studies) in the search and date last searched.                                                                                                                                  | Page 4                                |
| Search                    | 8 | Present full electronic search strategy for at least one database, including any limits used, such that it could be repeated.                                                                                                                                                                               | S8 Appendix                           |
| Study selection           | 9 | State the process for selecting studies (i.e., screening, eligibility, included in systematic review, and, if applicable, included in the meta-analysis).                                                                                                                                                   | Page 6, Fig 1                         |

|                                    |    |                                                                                                                                                                                                                        |                                                 |
|------------------------------------|----|------------------------------------------------------------------------------------------------------------------------------------------------------------------------------------------------------------------------|-------------------------------------------------|
| Data collection process            | 10 | Describe method of data extraction from reports (e.g., piloted forms, independently, in duplicate) and any processes for obtaining and confirming data from investigators.                                             | Page 5                                          |
| Data items                         | 11 | List and define all variables for which data were sought (e.g., PICOS, funding sources) and any assumptions and simplifications made.                                                                                  | Page 4, 5                                       |
| Risk of bias in individual studies | 12 | Describe methods used for assessing risk of bias of individual studies (including specification of whether this was done at the study or outcome level), and how this information is to be used in any data synthesis. | Appendix 1, 2, 3                                |
| Summary measures                   | 13 | State the principal summary measures (e.g., risk ratio, difference in means).                                                                                                                                          | Page 4, 5                                       |
| Synthesis of results               | 14 | Describe the methods of handling data and combining results of studies, if done, including measures of consistency (e.g., $I^2$ ) for each meta-analysis.                                                              | Page 5                                          |
| Risk of bias across studies        | 15 | Specify any assessment of risk of bias that may affect the cumulative evidence (e.g., publication bias, selective reporting within studies).                                                                           | Appendix 1, 2, 3                                |
| Additional analyses                | 16 | Describe methods of additional analyses (e.g., sensitivity or subgroup analyses, meta-regression), if done, indicating which were pre-specified.                                                                       | Page 5                                          |
| <b>RESULTS</b>                     |    |                                                                                                                                                                                                                        |                                                 |
| Study selection                    | 17 | Give numbers of studies screened, assessed for eligibility, and included in the review, with reasons for exclusions at each stage, ideally with a flow diagram.                                                        | Page 5, 6, Fig 1                                |
| Study characteristics              | 18 | For each study, present characteristics for which data were extracted (e.g., study size, PICOS, follow-up period) and provide the citations.                                                                           | Table 1, Appendix 1, 2, 3                       |
| Risk of bias within studies        | 19 | Present data on risk of bias of each study and, if available, any outcome level assessment (see item 12).                                                                                                              | Appendix 1, 2, 3                                |
| Results of individual studies      | 20 | For all outcomes considered (benefits or harms), present, for each study: (a) simple summary data for each intervention group (b) effect estimates and confidence intervals, ideally with a forest plot.               | Fig 1, Appendix 5                               |
| Synthesis of results               | 21 | Present results of each meta-analysis done, including confidence intervals and measures of consistency.                                                                                                                | Page 6, 7, Fig 1, Fig 3, Appendix 5, Appendix 7 |

|                             |    |                                                                                                                                                                                      |                                      |
|-----------------------------|----|--------------------------------------------------------------------------------------------------------------------------------------------------------------------------------------|--------------------------------------|
| Risk of bias across studies | 22 | Present results of any assessment of risk of bias across studies (see Item 15).                                                                                                      | Appendix 1, 2, 3                     |
| Additional analysis         | 23 | Give results of additional analyses, if done (e.g., sensitivity or subgroup analyses, meta-regression [see Item 16]).                                                                | Page 6, 7, Fig 2, Fig 5, Appendix 6, |
| <b>DISCUSSION</b>           |    |                                                                                                                                                                                      |                                      |
| Summary of evidence         | 24 | Summarize the main findings including the strength of evidence for each main outcome; consider their relevance to key groups (e.g., healthcare providers, users, and policy makers). | Page 7                               |
| Limitations                 | 25 | Discuss limitations at study and outcome level (e.g., risk of bias), and at review-level (e.g., incomplete retrieval of identified research, reporting bias).                        | Page 8                               |
| Conclusions                 | 26 | Provide a general interpretation of the results in the context of other evidence, and implications for future research.                                                              | Page 8, 9                            |
| <b>FUNDING</b>              |    |                                                                                                                                                                                      |                                      |
| Funding                     | 27 | Describe sources of funding for the systematic review and other support (e.g., supply of data); role of funders for the systematic review.                                           | In submitting system                 |

## Research Checklist

According to MOOSE statement for meta-analyses of observational studies

### Reporting of background should include

### Where to find in manuscript

Problem definition Manuscript (page 5)

Hypothesis statement Manuscript (page 5)

Description of study outcome(s) Manuscript (page 6)

Type of exposure or intervention used Manuscript (page 6)

Type of study designs used Manuscript (page 6)

Study population Manuscript (page 6)

### Reporting of search strategy should include

Qualifications of searchers (eg, librarians and investigators) Manuscript (page 6)

Search strategy, including time period included in the synthesis and keywords Manuscript (pages 5), Appendix 8

Effort to include all available studies, including contact with authors Manuscript (page 5-6)

Databases and registries searched Manuscript (page 6)

Search software used, name and version, including special features used (eg, explosion) Manuscript (page 6)

Use of hand searching (eg, reference lists of obtained articles) Manuscript (page 6)

List of citations located and those excluded, including justification Appendix 1

Method of addressing articles published in languages other than English n/a

Method of handling abstracts and unpublished studies Manuscript (page 6)

Description of any contact with authors No contact made

### Reporting of methods should include

Description of relevance or appropriateness of studies assembled for assessing the hypothesis to be tested Manuscript (page 6)

Rationale for the selection and coding of data (eg, sound clinical Manuscript (page 6)

principles or convenience)

1 Documentation of how data were classified and coded (eg, multiple  
2 raters, blinding, and interrater reliability) Manuscript (pages 6)

3  
4  
5  
6 Assessment of confounding (eg, comparability of cases and controls  
7 in studies where appropriate) Manuscript (page 6-7)  
8 Appendix 3

9  
10 Assessment of study quality, including blinding of quality assessors;  
11 stratification or regression on possible predictors of study results n/a

12  
13 Assessment of heterogeneity Manuscript (page 6-7)

14  
15 Description of statistical methods (eg, complete description of fixed  
16 or random effects models, justification of whether the chosen  
17 models account for predictors of study results, dose-response  
18 models, or cumulative meta-analysis) in sufficient detail to be  
19 replicated Manuscript (page 6-7)

20  
21  
22  
23  
24  
25  
26  
27  
28 Provision of appropriate tables and graphics Manuscript, Table 1, Figure 1-3 and  
29 Appendixes 1-7

### 30 31 32 **Reporting of results should include**

33  
34  
35 Graphic summarizing individual study estimates and overall  
36 estimate Figure 2-4

37  
38  
39 Table giving descriptive information for each study included Table 1

40  
41  
42 Results of sensitivity testing (eg, subgroup analysis) Figure 2, Appendixes 4-7

43  
44 Indication of statistical uncertainty of findings Manuscript, Figure 2-4

### 45 46 **Reporting of discussion should include**

47  
48  
49 Quantitative assessment of bias (eg, publication bias) Manuscript (page 8-9)

50  
51 Justification for exclusion (eg, exclusion of non—English-language  
52 citations) n/a

53  
54  
55 Assessment of quality of included studies n/a

### 56 57 **Reporting of conclusions should include**



|   |                                                                 |                          |
|---|-----------------------------------------------------------------|--------------------------|
| 1 | Consideration of alternative explanations for observed results  | Manuscript (pages 10-12) |
| 2 | Generalization of the conclusions (ie, appropriate for the data | Manuscript (page 12-13)  |
| 3 | presented and within the domain of the literature review)       |                          |
| 4 |                                                                 |                          |
| 5 |                                                                 |                          |
| 6 | Guidelines for future research                                  | Manuscript (page 12)     |
| 7 |                                                                 |                          |
| 8 | Disclosure of funding source                                    | Manuscript (page 14)     |
| 9 |                                                                 |                          |

10  
11  
12  
13  
14  
15  
16  
17  
18  
19  
20  
21  
22  
23  
24  
25  
26  
27  
28  
29  
30  
31  
32  
33  
34  
35  
36  
37  
38  
39  
40  
41  
42  
43  
44  
45  
46  
47  
48  
49  
50  
51  
52  
53  
54  
55  
56  
57  
58  
59  
60

For peer review only

# BMJ Open

## Caesarean Sections and Private Insurance: Systematic Review and Meta-analysis

|                                 |                                                                                                                                                                                                                                                                                                                                                                                                                                                                                                                                                                                                                  |
|---------------------------------|------------------------------------------------------------------------------------------------------------------------------------------------------------------------------------------------------------------------------------------------------------------------------------------------------------------------------------------------------------------------------------------------------------------------------------------------------------------------------------------------------------------------------------------------------------------------------------------------------------------|
| Journal:                        | <i>BMJ Open</i>                                                                                                                                                                                                                                                                                                                                                                                                                                                                                                                                                                                                  |
| Manuscript ID                   | bmjopen-2017-016600.R1                                                                                                                                                                                                                                                                                                                                                                                                                                                                                                                                                                                           |
| Article Type:                   | Research                                                                                                                                                                                                                                                                                                                                                                                                                                                                                                                                                                                                         |
| Date Submitted by the Author:   | 16-May-2017                                                                                                                                                                                                                                                                                                                                                                                                                                                                                                                                                                                                      |
| Complete List of Authors:       | Hoxha, Ilir; Universitat Bern Institut fur Sozial- und Praventivmedizin, Health Services Research<br>Syrogiannouli, Lamprini; Universitat Bern, Berner Institut für Hausarztmedizin (BIHAM)<br>Braha, Medina; International Business College Mitrovica, Department of Managment and Marketing<br>Goodman, David C; Dartmouth College Geisel School of Medicine<br>da Costa, Bruno; Universitat Bern, Berner Institut für Hausarztmedizin (BIHAM)<br>Jüni, Peter; Applied Health Research Centre (AHRC), Li Ka Shing Knowledge Institute of St. Michael's Hospital, Department of Medicine, University of Toronto |
| <b>Primary Subject Heading</b>: | Health services research                                                                                                                                                                                                                                                                                                                                                                                                                                                                                                                                                                                         |
| Secondary Subject Heading:      | Health economics, Health policy, Health services research, Obstetrics and gynaecology                                                                                                                                                                                                                                                                                                                                                                                                                                                                                                                            |
| Keywords:                       | caesarean section, health insurance, private insurance, financial incentives, medical practice variation, health services                                                                                                                                                                                                                                                                                                                                                                                                                                                                                        |
|                                 |                                                                                                                                                                                                                                                                                                                                                                                                                                                                                                                                                                                                                  |

SCHOLARONE™  
Manuscripts

## Caesarean Sections and Private Insurance: Systematic Review and Meta-analysis

*Ilir Hoxha PhD Student,<sup>a,b</sup> Lamprini Syrogiannouli Research Associate,<sup>b</sup> Medina Braha Lecturer, David C. Goodman Professor of Paediatrics,<sup>ad</sup> Bruno R. da Costa Head of Statistics & Methodology,<sup>b</sup> Peter Jüni Professor of Medicine and Director<sup>e</sup>*

<sup>a</sup> Institute of Social and Preventive Medicine, University of Bern, 3012 Bern, Switzerland

<sup>b</sup> Institute of Primary Health Care, University of Bern, 3012 Bern, Switzerland

<sup>c</sup> International Business College Mitrovica, 40000 Mitrovica, Kosovo

<sup>d</sup> The Dartmouth Institute for Health Policy and Clinical Practice, 03766 Lebanon, NH, United States

<sup>e</sup> Applied Health Research Centre (AHRC), Li Ka Shing Knowledge Institute of St. Michael's Hospital, Department of Medicine, University of Toronto, M5B 1M8 Toronto, ON, Canada

*Correspondence to: Ilir Hoxha, Finkenhubelweg 11, 3012 Bern, Switzerland; ilir.hoxha@ispm.unibe.ch; +377 45 588 683*

### Key words

caesarean section, health insurance, private insurance, financial incentives, medical practice variation, health services

### Word count

2683 words excluding title page, abstract, references, figures and tables.

## Abstract

**Objective** - Financial incentives associated with private insurance may encourage health care providers to perform more caesarean sections. We therefore sought to determine the association of private insurance and odds of caesarean section.

**Design** - Systematic review and meta-analysis.

**Data sources** - MEDLINE, Embase, and The Cochrane Library from the first year of records through August 2016.

**Eligibility criteria** – We included studies that reported data to allow the calculation of odds ratios of caesarean section of privately insured as compared to publicly insured women.

**Outcomes** - The pre-specified primary outcome was the adjusted odds ratio of births delivered by caesarean section of women covered with private insurance as compared with women covered with public insurance. The pre-specified secondary outcome was the crude odds ratio of births delivered by caesarean section of women covered with private insurance as compared with women covered with public insurance.

**Results** - Eighteen articles describing 21 separate studies in 12.9 million women were included in this study. In a meta-analysis of 13 studies, the adjusted odds of delivery by caesarean section was 1.13 higher among privately insured women as compared with women with public insurance coverage (95% CI 1.07 to 1.18) with no relevant heterogeneity between studies ( $\tau^2=0.006$ ). The meta-analysis of crude estimates from 12 studies revealed a somewhat more pronounced association (pooled odds ratio 1.35, 95% CI 1.27 to 1.44) with no relevant heterogeneity between studies ( $\tau^2=0.011$ ).

**Conclusions** - Caesarean sections are more likely to be performed in privately insured women as compared with women using public health insurance coverage. Although this

1  
2  
3  
4  
5  
6  
7  
8  
9  
10  
11  
12  
13  
14  
15  
16  
17  
18  
19  
20  
21  
22  
23  
24  
25  
26  
27  
28  
29  
30  
31  
32  
33  
34  
35  
36  
37  
38  
39  
40  
41  
42  
43  
44  
45  
46  
47  
48  
49  
50  
51  
52  
53  
54  
55  
56  
57  
58  
59  
60

effect is small on average and variable in its magnitude, it is present in all analyses we performed.

For peer review only

## Strengths and limitations of this study

- ✓ Our meta-analysis includes a broad literature search, screening and data extraction performed in duplicate and an exploration of study characteristics as a potential source of variation between studies and represents major strength of our study.
- ✓ Sensitivity analyses was performed involving studies that required exclusion in main analysis due to overlapping populations.
- ✓ The differences in the characteristics of the study populations, type of data used, types of CS analysed and variables used for adjustment in statistical analyses across studies represent a major limitation of our study.
- ✓ Unadjusted estimates of associations were larger, which suggests the presence of confounding, and we cannot completely rule out residual confounding in adjusted estimates.

## Introduction

The global raise of caesarean section (CS) rates during the past decades has raised concerns over appropriateness of usage of the procedure (1, 2). The increase and immense variation among countries' regions and hospitals has been persistent over the years (3-14). Brazil has the highest rate of CS followed by China, Turkey, and Mexico (15). United States and other developed countries are not far behind. Even countries which traditionally have had low CS rates, like Norway or Sweden have seen substantial increase in CS rates (15). This increase has been accompanied with considerable variation within countries (15). In the United States, there was a fourfold difference in CS rates in low and high use areas (15). In England, the rates have varied threefold among National Health Service trusts (15). In British Columbia, Canada, the CS rates varied from 14.7 % to 27.6 % across health service delivery areas (15). The understanding of escalation of CS rates is important as it may prevent negative outcomes on health of mothers and newborns as well as reduce unnecessary costs related to delivery.

Such increase and variation cannot be explained by clinical factors alone (15). Evidence points to many additional, health system related factors, in particular supplier related factors (15). Financial incentives associated with private insurance seem to influence supplier behaviour, be that physician or hospital, affecting this way clinical decision as to whether perform CS or not (14-22). We therefore performed a systematic review and meta-analysis to determine the association of insurance status of women with the odds of delivery by CS.

## Materials and methods

### *Search strategy and data sources*

We combined search terms indicating CS, such as 'caesarean section', 'caesarean delivery', 'caesarean', with search terms associated with the study design such as 'small area analysis,' 'medical practice variation,' and search terms associated with determinants of variation and

1  
2  
3 increase of CS rates. We did not restrict search by type of language or publication date. We  
4  
5 searched MEDLINE, Embase, and The Cochrane Library from inception to August 4, 2016,  
6  
7 when the search was last updated. In addition, we manually searched the reference lists of all  
8  
9 included studies and earlier systematic reviews that we identified.  
10  
11

### 12 ***Study selection and outcomes***

13  
14 To be eligible for inclusion, studies had to report data to allow the calculation of odds ratios  
15  
16 (OR) of CS comparing women covered by private insurance with women covered by public  
17  
18 insurance in a specific health care system. The pre-specified primary outcome was the  
19  
20 adjusted OR of births delivered by CS of women covered with private insurance as compared  
21  
22 with women with public insurance coverage. The pre-specified secondary outcome was the  
23  
24 crude OR of CS of women covered with private insurance as compared with women with  
25  
26 public insurance.  
27  
28  
29  
30

### 31 ***Data extraction***

32  
33 Two researchers (IH and MB) screened the papers and extracted data independently. Data  
34  
35 from full text articles were extracted onto a data extraction sheet designed to capture data on  
36  
37 study population, study design, data sources, setting, type of CS analysed, and statistical  
38  
39 analysis. We extracted adjusted and/or unadjusted ORs of CS of women with private  
40  
41 insurance as compared with CS of women with public insurance. Differences among  
42  
43 researchers with regards to study inclusion and data extraction procedure were resolved by  
44  
45 consensus and consultation with other authors.  
46  
47  
48  
49

### 50 ***Main analysis***

51  
52 We used standard inverse-variance random effects meta-analysis to estimate the pooled OR.  
53  
54 An OR above one indicates that CS are more frequently performed in women with private  
55  
56 insurance than in women with public insurance. We calculated the variance estimate  $\tau^2$  as a  
57  
58  
59  
60



1  
2  
3 measure of heterogeneity between studies (23). We pre-specified a  $\tau^2$  of 0.04 to represent low  
4 heterogeneity, 0.16 to represent moderate, and 0.36 to represent high heterogeneity between  
5 studies (24). We conducted analyses stratified by study design, period of data collection,  
6 country, type of CS analysed, parity, inclusion of women with previous CS, and pregnancy  
7 risk of included women to investigate potential reasons for between-study heterogeneity and  
8 used chi-square tests to calculate p-values for interaction, or tests for linear trends in cases of  
9 more than two ordered strata. All p-values are two-sided.  
10  
11  
12  
13  
14  
15  
16  
17  
18

### 19 *Sensitivity analyses*

20  
21 Five studies (25-29) were excluded from the main analysis, as they had an overlapping  
22 population with a larger study (30) that was included. For this reason, we repeated all  
23 analyses including these five studies (25-29) while excluding the larger one (30). Finally, we  
24 visually inspected a funnel plot of adjusted ORs against their standard errors to address  
25 potential small study effects (31). We used STATA, release 13, for all analyses (Stata-Corp,  
26 College Station, Texas).  
27  
28  
29  
30  
31  
32  
33  
34  
35

### 36 *Patient involvement*

37  
38 No patients were involved in this study. We used data from published papers only.  
39  
40  
41

## 42 **Results**

43  
44 We identified a total of 1490 records with our search strategy (Figure 1): 935 from Medline:  
45 494 from Embase; 38 from the Cochrane Library and 23 from manual search. After removing  
46 duplicates, we screened 1264 records for eligibility, and retained 166 for full text  
47 examination. We excluded another 124 that did not report insurance status of women, 23 that  
48 were otherwise irrelevant and one study that had an overlapping population. Finally, 18  
49 articles describing 21 separate studies in 12.9 million women were included in review and  
50 meta-analysis.  
51  
52  
53  
54  
55  
56  
57  
58  
59  
60

1  
2  
3 Characteristics of studies are presented in Table 1 and Appendixes 1,2 and 3. Sixteen studies  
4  
5 were cross-sectional, five were retrospective cohort studies. Only one study used surveys, 18  
6  
7 hospital records, seven birth registries, and one census data. All studies were published in  
8  
9 English. Most studies were from the United States. Nineteen studies included the entire  
10  
11 population of eligible cases, while only two studies selected cases randomly. Case exclusion  
12  
13 criteria varied considerably: one study excluded women aged 14 and younger; three excluded  
14  
15 multiparas; eight excluded women with previous CS; eight excluded stillbirths and nine  
16  
17 multiple births; six excluded cases with specific presentations of the foetus; six studies  
18  
19 excluded preterm births, and 13 studies excluded cases due to provider characteristics. Two  
20  
21 studies reported ORs of CS for which indication was established before labour (including CS  
22  
23 on maternal request) only, three reported CS for which indication was established during  
24  
25 labour and 16 reported ORs of any CS irrespective of indication. Eighteen studies adjusted  
26  
27 for different characteristics as presented in Appendix 3.  
28  
29  
30  
31

32  
33 Figure 2 presents the meta-analysis of the 13 studies that reported adjusted ORs (30, 32-41),  
34  
35 all of them using public insurance as the reference group. Overall, the odds of receiving CS  
36  
37 were 1.13 higher for women with private insurance coverage as compared women with public  
38  
39 health insurance coverage (95% CI 1.07 to 1.18), with no relevant heterogeneity between  
40  
41 studies ( $\tau^2=0.006$ ). Figure 3 presents results of stratified analyses of adjusted odds ratios.  
42  
43 Estimates varied between strata, in particular for country (P for interaction<0.001), type of  
44  
45 caesarean section (P for interaction=0.001), inclusion of women with previous CS (P for  
46  
47 interaction=0.001) and pregnancy risk (P for interaction<0.001). Appendix 4 shows a funnel  
48  
49 plot of adjusted ORs against their standard errors on a log scale; there was no evidence for  
50  
51 small study effects. Figure 4 presents the meta-analysis of crude ORs with a slightly stronger  
52  
53 average association (pooled OR 1.35, 95% CI 1.27 to 1.44) and no relevant heterogeneity  
54  
55  
56  
57  
58  
59  
60

1  
2  
3 between studies ( $\tau^2=0.011$ ). Appendix 5 presents adjusted associations for different states in  
4  
5 the United States. Adjusted estimates ranged from 0.96 in Maryland to 1.54 in New Jersey.  
6  
7

8  
9 Appendixes 6 to 8 report results from sensitivity analyses after inclusion of five smaller  
10  
11 studies (25-29) and exclusion of a larger study (30) that had overlapping populations with the  
12  
13 five smaller ones. Appendix 6 shows the meta-analysis of the 16 studies (25-28, 32-41) with  
14  
15 a pooled adjusted OR of 1.14 (95% CI 1.07 to 1.22) and no evidence for relevant  
16  
17 heterogeneity between studies ( $\tau^2=0.015$ ). Appendix 7 presents results of stratified analyses,  
18  
19 with estimates varying between countries ( $P$  for interaction $<0.001$ ), type of caesarean section  
20  
21 ( $P$  for interaction $=0.007$ ) and pregnancy risks ( $P$  for interaction $<0.001$ ). Finally, Appendix 8  
22  
23 presents the meta-analysis of crude ORs, again with a stronger association on average (pooled  
24  
25 OR 1.33, 95% CI 1.25 to 1.41) and no relevant heterogeneity between studies ( $\tau^2=0.014$ ).  
26  
27  
28  
29

## 30 **Discussion**

31  
32 Our systematic review and meta-analysis estimated that the overall odds of receiving a  
33  
34 caesarean section are on average 1.13 times higher for privately insured women compared  
35  
36 with women covered with public insurance. The increased risk was observed across all  
37  
38 subgroups of studies in stratified analyses as well as in sensitivity analysis.  
39  
40  
41

## 42 **Context**

43  
44 To our knowledge, this is the first meta-analysis to examine the association of CS rates with  
45  
46 types of insurance. A recently published meta-analysis found that the odds of delivery by CS  
47  
48 was 1.41 higher in for-profit hospitals as compared with non-profit hospitals (95% CI 1.24 to  
49  
50 1.60) (22). These findings were confirmed across subgroups (i.e. such as country, year, or  
51  
52 study design) of studies in stratified analyses, indicating financial incentives may play an  
53  
54 important role in such outcome (22). We found three other recent meta-analyses that  
55  
56  
57  
58  
59  
60

1  
2  
3 summarized CS studies and found a strong association with obesity (42), Sub-Saharan Africa  
4 ethnic origin (43) and labour induction (44). Our estimates of a 14 percent increase are on the  
5  
6 lower end of the strength of associations found in earlier studies.  
7  
8

### 9 10 11 ***Strengths and limitations***

12 The major strengths of our meta-analysis include a broad literature search, screening and data  
13 extraction performed in duplicate, an exploration of study characteristics as a potential source  
14 of variation between studies, and sensitivity analyses involving studies that required  
15 exclusion due to overlapping populations. Major limitations are differences in the  
16 characteristics of the study populations, type of data used, types of CS analysed and variables  
17 used for adjustment in statistical analyses across studies. Unadjusted estimates of associations  
18 were larger, which suggests the presence of confounding, and we cannot completely rule out  
19 residual confounding in adjusted estimates.  
20  
21  
22  
23  
24  
25  
26  
27  
28  
29

### 30 31 32 ***Mechanisms***

33 Existing evidence suggests that possible causes for higher odds of CS in women insured privately lie  
34 in the differences in payment for CS and reimbursement arrangements among insurers as well as  
35 providers' responses to these arrangements. In the countries included in our analysis, private health  
36 insurers generally reimburse hospitals at higher fees for providing a CS compared to the public  
37 insurers (35). This incentive is heightened when public insurance funds hospital care through  
38 a budget (e.g. Australia and Ireland) rather than fee-for-service, which is common in private  
39 insurance (45, 46). Similar incentives are present in physician payment.  
40  
41  
42  
43  
44  
45  
46  
47  
48

49 Multiple studies have shown that hospitals are motivated by and responsive to financial  
50 incentives (22, 33, 47, 48), although Grant (35) argues that their impact is small. One  
51 example is the financial benefit associated with longer hospital stays associated with CS (47,  
52 49). Hospitals may incentivize physicians (47, 48) to align their clinical decision with  
53  
54  
55  
56  
57  
58  
59  
60

1  
2  
3 institutional strategies, such as patient scheduling policies that steer patients with private  
4 insurance to more profit prone physicians (47, 48). Physicians are known to be motivated by  
5 higher fees paid for CS as compared with vaginal delivery (47). They often act as self-  
6 interested economic agents according to economic models of physician behaviour, by  
7 maximizing income and convenience (33). Physicians are also in a position to exploit  
8 asymmetry of information between them and patients (50, 51), which leads to  
9 recommendations that are not always aligned with patient needs or preferences (15). There is  
10 also evidence that physicians with higher numbers of privately insured patients will tend to  
11 perform more CS (33, 35); explanations include perceptions that patients with private  
12 insurance have a higher social class, or more prevalent concerns about malpractice liability in  
13 patients with private insurance (52).

14  
15  
16  
17  
18  
19  
20  
21  
22  
23  
24  
25  
26  
27  
28 Comparing 'public insurance' and 'private insurance' across countries is not a  
29 straightforward exercise as the meaning of such distinction can vary substantially across  
30 countries. In the United States 'public insurance' is insurance assigned to specific categories  
31 of population (by age, disability, poverty or military service) and 'private insurance' is  
32 insurance mainly organized through employment. In general, private insurance offers higher  
33 reimbursement rates for surgical procedures, and this may incentivize CS. The heterogeneity  
34 of adjusted estimates across states in the United States (Appendix 5) points to setting specific  
35 factors that will influence the effect of insurance on the odds of CS and are worth of further  
36 investigation. According to Burns et al., the lacking association in Arizona (OR=1.02) may  
37 be due to equal magnitudes of re-imbursements of hospitals for vaginal birth and CS (33). In  
38 Maryland (OR=0.96), the state administration introduced HealthChoice Program in 1997, that  
39 was intended to provide prevention oriented healthcare services, enact better accountability  
40 measures for managed care organizations, and ensure efficient use of financial resources (37).  
41 This program introduced a mandatory managed care system for Medicaid beneficiaries,  
42  
43  
44  
45  
46  
47  
48  
49  
50  
51  
52  
53  
54  
55  
56  
57  
58  
59  
60

1  
2  
3 which replaced a fee-for-service model. This resulted in more patients receiving managed  
4 care irrespective of their insurance status and, in turn, use of similar policies in patients with  
5 public and private insurance (37). We are unaware of plausible explanations for the lack of  
6 associations observed in Michigan (OR 1.01) and Ohio (OR 1.00). This analysis shows that  
7 variation in CS rates among insurers within the United States can be explained by differences  
8 in reimbursement arrangements nested within public and private insurance.  
9  
10  
11  
12  
13  
14  
15  
16

17 For the other two countries, Ireland and Australia, included in the adjusted analysis, 'private health  
18 insurance' status differs in character from the United States but offers similarly higher payment levels  
19 for procedures. In Australia, women of childbearing age with private insurance, would have increased  
20 the use of private obstetricians, leading to higher rates of CS (53). In Ireland, the financial  
21 incentives in private insurance are similar, and are associated with striking inequities in care  
22 (54).  
23  
24  
25  
26  
27  
28  
29  
30

### 31 **Policy and research implications**

32  
33 Increases in the cost of care and hospital charges have become central issues in policy  
34 discussion in the United States and elsewhere (15, 55). While the public health care costs are  
35 reaching unsustainable levels, hospital charges can have alarming effects on patients (55). In  
36 addition, the potential negative clinical effects of CS on mothers and newborns have raised  
37 concerns among clinicians, academics and policymakers alike (15).  
38  
39  
40  
41  
42  
43  
44

45 Recent studies and their media coverage and associated increase in public awareness of high  
46 CS rates and changes in reimbursement policy have led to recent decreases of CS rates (18).  
47  
48

49 Our study provides additional evidence to support policy and advocacy efforts that address  
50 escalating CS rates, in particular their association with financial incentives. Effective policy  
51 measures often require context, country or state specific policy analyses investigating  
52 particular insurance schemes. These setting specific analyses are essential as incentives and  
53  
54  
55  
56  
57  
58  
59  
60

1  
2  
3 reimbursement arrangements within health insurance schemes may differ across health care  
4  
5 systems. We recognize that while categories 'public insurance' and 'private insurance' are useful  
6  
7 markers of higher reimbursement rates, other aspects of insurance reimbursement may also influence  
8  
9 the odds of CS.  
10

11  
12 As we analyse CS rates relation with health insurance schemes we need also to be aware of  
13  
14 complexity of interaction of different determinants and their influence in CS rates. The  
15  
16 published literature has identified a number of determinants of CS rates which operate at  
17  
18 different levels of health care systems (macro, meso, and micro) (15). At the macro level of  
19  
20 national health systems, operate factors such as health financing system, social and political  
21  
22 context, legal regulations, general cultural and social norms and similar. At the meso level are  
23  
24 hospitals and health care facilities. Their ownership status, availability of resources and size  
25  
26 are known to influence CS rates (15, 22). Finally, at the micro level, we have clinical units  
27  
28 that provide care, medical staff and patients, which are characterised with all sorts of features  
29  
30 that can influence the decision for CS. For example, clinical unit staff composition, or  
31  
32 physician education, gender and experience, or mother preference, age and race, are all  
33  
34 known to determine the rates of CS (15).  
35  
36  
37  
38  
39

### 40 ***Conclusion***

41  
42 This systematic review and meta-analysis indicates that CS are more likely to be performed  
43  
44 in privately insured women as compared to women with public health insurance coverage.  
45  
46 Although this effect is small and variable across strata, it is present in all performed analysis.  
47  
48 Review of setting-specific payment levels and reimbursement arrangements within health  
49  
50 insurance schemes will enable a better understanding of influencing factors. Efforts to  
51  
52 address payment levels for delivery procedures and reform of reimbursement arrangements  
53  
54 may lead to a reduction of CS rates to more appropriate levels (18, 22, 37, 56).  
55  
56  
57  
58  
59  
60

## Acknowledgments

### *Exclusive Licence*

*The Corresponding Author has the right to grant on behalf of all authors and does grant on behalf of all authors, an exclusive licence (or non-exclusive for government employees) on a worldwide basis to the BMJ Publishing Group Ltd and its Licensees to permit this article (if accepted) to be published in BMJ Open and any other BMJPGGL products to exploit all subsidiary rights, as set out in our licence <http://journals.bmj.com/site/authors/editorial-policies.xhtml#copyright> and the Corresponding Author accepts and understands that any supply made under these terms is made by BMJPGGL to the Corresponding Author. All articles published in BMJ Open will be made available on an Open Access basis (with authors being asked to pay an open access fee - see <http://bmjopen.bmj.com/site/about/resources.xhtml>) Access shall be governed by a Creative Commons licence – details as to which Creative Commons licence will apply to the article are set out in our licence referred to above.*

### *Contributorship Statement*

*IH, LS, DG, PJ conceived and designed the study. IH, LS, MB performed the data extraction and preparation. IH, LS, BdC, PJ analysed the data. IH, DG, PJ wrote the paper, which was critically reviewed and approved by all authors.*

*We thank Doris Kopp and Beatrice Minder for her valuable help during development and execution of search strategy, Xhyljeta Luta for support in study design and data extraction and Dr. Karmit Zysman for editorial contribution.*

### *Competing interests statement*



1  
2  
3 *All authors have completed the ICMJE uniform disclosure form at*  
4  
5 *www.icmje.org/coi\_disclosure.pdf and declare: no support from any organisation for the*  
6  
7 *submitted work; no financial relationships with any organisations that might have an interest*  
8  
9 *in the submitted work in the previous three years; no other relationships or activities that*  
10  
11 *could appear to have influenced the submitted work.*

12  
13  
14  
15  
16 ***Funding statement***

17  
18 *No funding was received to perform this study. All authors, had full access to all of the data*  
19  
20 *(including statistical reports and tables) in the study and take responsibility for the integrity*  
21  
22 *of the data and the accuracy of the data analysis.*

23  
24  
25  
26 ***Data sharing statement***

27  
28 *No additional unpublished data are available from the study.*  
29  
30  
31  
32  
33  
34  
35  
36  
37  
38  
39  
40  
41  
42  
43  
44  
45  
46  
47  
48  
49  
50  
51  
52  
53  
54  
55  
56  
57  
58  
59  
60

## References

1. Molina G, Weiser TG, Lipsitz SR, Esquivel MM, Uribe-Leitz T, Azad T, et al. Relationship Between Cesarean Delivery Rate and Maternal and Neonatal Mortality. *JAMA*. 2015;314(21):2263-70.
2. Vogel JP, Betran AP, Vindevoghel N, Souza JP, Torloni MR, Zhang J, et al. Use of the Robson classification to assess caesarean section trends in 21 countries: a secondary analysis of two WHO multicountry surveys. *Lancet Glob Health*. 2015;3(5):e260-70.
3. McPherson K, Gon G, Scott M. International Variations in a Selected Number of Surgical Procedures: OECD Publishing; 2013. Available from: <http://dx.doi.org/10.1787/5k49h4p5g9mw-en>. Accessed 15 May 2017.
4. Bragg F, Cromwell DA, Edozien LC, Gurol-Urganci I, Mahmood TA, Templeton A, et al. Variation in rates of caesarean section among English NHS trusts after accounting for maternal and clinical risk: cross sectional study. *BMJ*. 2010;341:c5065.
5. Baicker K, Buckles KS, Chandra A. Geographic variation in the appropriate use of cesarean delivery. *Health Aff (Millwood)*. 2006;25(5):w355-67.
6. Hanley GE, Janssen PA, Greyson D. Regional variation in the cesarean delivery and assisted vaginal delivery rates. *Obstet Gynecol*. 2010;115(6):1201-8.
7. Feng XL, Xu L, Guo Y, Ronsmans C. Factors influencing rising caesarean section rates in China between 1988 and 2008. *Bull World Health Organ*. 2012;90(1):30-9, 9A.
8. Stephenson PA, Bakoula C, Hemminki E, Knudsen L, Lefevre M, Schenker J, et al. Patterns of use of obstetrical interventions in 12 countries. *Paediatr Perinat Epidemiol*. 1993;7(1):45-54.

- 1  
2  
3 9. Renwick MY. Caesarean section rates, Australia 1986: variations at state and small  
4  
5 area level. *Aust N Z J Obstet Gynaecol.* 1991;31(4):299-304.  
6  
7
- 8  
9 10. Brennan DJ, Robson MS, Murphy M, O'Herlihy C. Comparative analysis of  
10  
11 international cesarean delivery rates using 10-group classification identifies significant  
12  
13 variation in spontaneous labor. *Am J Obstet Gynecol.* 2009;201(3):308 e1-8.  
14  
15
- 16 11. Festin MR, Laopaiboon M, Pattanittum P, Ewens MR, Henderson-Smart DJ,  
17  
18 Crowther CA. Caesarean section in four South East Asian countries: reasons for, rates,  
19  
20 associated care practices and health outcomes. *BMC Pregnancy Childbirth.* 2009;9:17.  
21  
22
- 23 12. Johnson N, Ansell D. Variation in caesarean and instrumental delivery rates in New  
24  
25 Zealand hospitals. *Aust N Z J Obstet Gynaecol.* 1995;35(1):6-11.  
26  
27
- 28 13. Keskimaki I, Aro S, Teperi J. Regional variation in surgical procedure rates in  
29  
30 Finland. *Scand J Soc Med.* 1994;22(2):132-8.  
31  
32
- 33 14. Knight M, Sullivan EA. Variation in caesarean delivery rates. *BMJ.* 2010;341:c5255.  
34  
35  
36
- 37 15. Hoxha I, Busato A, Luta X. Medical Practice Variations in Reproductive, Obstetric,  
38  
39 and Gynecological Care. In: Johnson A, Stukel AT, editors. *Medical Practice Variations.*  
40  
41 Boston, MA: Springer US; 2016. p. 141-60.  
42  
43
- 44 16. Keeler EB, Brodie M. Economic incentives in the choice between vaginal delivery  
45  
46 and cesarean section. *Milbank Q.* 1993;71(3):365-404.  
47  
48
- 49 17. Mossialos E, Allin S, Karras K, Davaki K. An investigation of Caesarean sections in  
50  
51 three Greek hospitals: the impact of financial incentives and convenience. *Eur J Public*  
52  
53 *Health.* 2005;15(3):288-95.  
54  
55  
56  
57  
58  
59  
60

- 1  
2  
3 18. Grant D. Physician financial incentives and cesarean delivery: new conclusions from  
4 the healthcare cost and utilization project. *J Health Econ.* 2009;28(1):244-50.  
5  
6  
7  
8  
9 19. Gregory KD, Korst LM, Platt LD. Variation in elective primary cesarean delivery by  
10 patient and hospital factors. *Am J Obstet Gynecol.* 2001;184(7):1521-32; discussion 32-4.  
11  
12  
13  
14 20. Koroukian SM, Bush D, Rimm AA. Comparison of cesarean section rates in fee-for-  
15 service versus managed care patients in the Ohio Medicaid population, 1992-1997. *The*  
16 *American journal of managed care.* 2001;7(2):134-42.  
17  
18  
19  
20  
21  
22 21. Roberts CL, Tracy S, Peat B. Rates for obstetric intervention among private and  
23 public patients in Australia: population based descriptive study. *BMJ.* 2000;321(7254):137-  
24 41.  
25  
26  
27  
28  
29  
30 22. Hoxha I, Syrogiannouli L, Luta X, Tal K, Goodman DC, da Costa BR, et al.  
31 Caesarean sections and for-profit status of hospitals: systematic review and meta-analysis.  
32 *BMJ Open.* 2017;7(2):e013670.  
33  
34  
35  
36  
37 23. DerSimonian R, Laird N. Meta-analysis in clinical trials. *Controlled clinical trials.*  
38 1986;7(3):177-88.  
39  
40  
41  
42  
43 24. da Costa BR, Juni P. Systematic reviews and meta-analyses of randomized trials:  
44 principles and pitfalls. *Eur Heart J.* 2014;35(47):3336-45.  
45  
46  
47  
48  
49 25. Coonrod DV, Drachman D, Hobson P, Manriquez M. Nulliparous term singleton  
50 vertex cesarean delivery rates: institutional and individual level predictors. *Am J Obstet*  
51 *Gynecol.* 2008;198(6):694 e1-11; discussion e11.  
52  
53  
54  
55  
56  
57  
58  
59  
60

- 1  
2  
3 26. Huesch MD. Association between type of health insurance and elective cesarean  
4 deliveries: New Jersey, 2004-2007. *Am J Public Health*. 2011;101(11):e1-7.  
5  
6  
7  
8  
9 27. Movsas TZ, Wells E, Mongoven A, Grigorescu V. Does medical insurance type  
10 (private vs public) influence the physician's decision to perform Caesarean delivery? *J Med*  
11 *Ethics*. 2012;38(8):470-3.  
12  
13  
14  
15  
16 28. Henke RM, Wier LM, Marder WD, Friedman BS, Wong HS. Geographic variation in  
17 cesarean delivery in the United States by payer. *BMC Pregnancy Childbirth*. 2014;14:387.  
18  
19  
20  
21  
22 29. Sebastiao YV, Womack L, Vamos CA, Louis JM, Olaoye F, Caragan T, et al.  
23 Hospital variation in cesarean delivery rates: contribution of individual and hospital factors in  
24 Florida. *Am J Obstet Gynecol*. 2016;214(1):123 e1- e18.  
25  
26  
27  
28  
29  
30 30. Kozhimannil KB, Shippee TP, Adegoke O, Vemig BA. Trends in hospital-based  
31 childbirth care: the role of health insurance. *The American journal of managed care*.  
32 2013;19(4):e125-32.  
33  
34  
35  
36  
37 31. Nuesch E, Trelle S, Reichenbach S, Rutjes AW, Tschannen B, Altman DG, et al.  
38 Small study effects in meta-analyses of osteoarthritis trials: meta-epidemiological study.  
39 *BMJ*. 2010;341:c3515.  
40  
41  
42  
43  
44  
45 32. Braveman P, Egerter S, Edmonston F, Verdon M. Racial/ethnic differences in the  
46 likelihood of cesarean delivery, California. *American Journal of Public Health*.  
47 1995;85(5):625-30.  
48  
49  
50  
51  
52  
53 33. Burns LR, Geller SE, Wholey DR. The effect of physician factors on the cesarean  
54 section decision. *Medical care*. 1995;33(4):365-82.  
55  
56  
57  
58  
59  
60

- 1  
2  
3 34. Aron DC, Gordon HS, DiGiuseppe DL, Harper DL, Rosenthal GE. Variations in risk-  
4  
5 adjusted cesarean delivery rates according to race and health insurance. *Med Care*.  
6  
7 2000;38(1):35-44.  
8  
9  
10 35. Grant D. Explaining source of payment differences in U.S. cesarean rates: why do  
11  
12 privately insured mothers receive more cesareans than mothers who are not privately insured?  
13  
14 *Health Care Manag Sci*. 2005;8(1):5-17.  
15  
16  
17 36. Korst LM, Gornbein JA, Gregory KD. Rethinking the cesarean rate: how pregnancy  
18  
19 complications may affect interhospital comparisons. *Med Care*. 2005;43(3):237-45.  
20  
21  
22  
23 37. Misra A. Impact of the HealthChoice program on cesarean section and vaginal birth  
24  
25 after C-section deliveries: a retrospective analysis. *Matern Child Health J*. 2008;12(2):266-  
26  
27 74.  
28  
29  
30  
31 38. Huesch MD, Currid-Halkett E, Doctor JN. Measurement and risk adjustment of  
32  
33 prelabor cesarean rates in a large sample of California hospitals. *Am J Obstet Gynecol*.  
34  
35 2014;210(5):443 e1-17.  
36  
37  
38  
39 39. Lutomski JE, Murphy M, Devane D, Meaney S, Greene RA. Private health care  
40  
41 coverage and increased risk of obstetric intervention. *BMC Pregnancy Childbirth*.  
42  
43 2014;14:13.  
44  
45  
46  
47 40. Bannister-Tyrrell M, Patterson JA, Ford JB, Morris JM, Nicholl MC, Roberts CL.  
48  
49 Variation in hospital caesarean section rates for preterm births. *Aust N Z J Obstet Gynaecol*.  
50  
51 2015;55(4):350-6.  
52  
53  
54  
55 41. Sentell T, Chang A, Ahn HJ, Miyamura J. Maternal language and adverse birth  
56  
57 outcomes in a statewide analysis. *Women & health*. 2016;56(3):257-80.  
58  
59  
60

- 1  
2  
3 42. Poobalan AS, Aucott LS, Gurung T, Smith WC, Bhattacharya S. Obesity as an  
4 independent risk factor for elective and emergency caesarean delivery in nulliparous women-  
5  
6 independent risk factor for elective and emergency caesarean delivery in nulliparous women-  
7  
8 -systematic review and meta-analysis of cohort studies. *Obes Rev.* 2009;10(1):28-35.  
9
- 10 43. Merry L, Small R, Blondel B, Gagnon AJ. International migration and caesarean  
11  
12 birth: a systematic review and meta-analysis. *BMC Pregnancy Childbirth.* 2013;13:27.  
13  
14
- 15 44. Mishanina E, Rogozinska E, Thatthi T, Uddin-Khan R, Khan KS, Meads C. Use of  
16  
17 labour induction and risk of cesarean delivery: a systematic review and meta-analysis. *CMAJ.*  
18  
19 2014;186(9):665-73.  
20  
21  
22
- 23 45. Health Care System and Health Policy in Australia: The Commonwealth Fund;  
24  
25 Available from: [http://www.commonwealthfund.org/grants-and-](http://www.commonwealthfund.org/grants-and-fellowships/fellowships/australian-american-health-policy-fellowship/health-care-system-and-health-policy-in-australia)  
26  
27 [fellowships/fellowships/australian-american-health-policy-fellowship/health-care-system-](http://www.commonwealthfund.org/grants-and-fellowships/fellowships/australian-american-health-policy-fellowship/health-care-system-and-health-policy-in-australia)  
28  
29 [and-health-policy-in-australia](http://www.commonwealthfund.org/grants-and-fellowships/fellowships/australian-american-health-policy-fellowship/health-care-system-and-health-policy-in-australia). Accessed 15 May 2017.  
30  
31  
32
- 33 46. New hospital funding system next year: Irish Health; Available from:  
34  
35 <http://www.irishhealth.com/article.html?id=21707>. Accessed 15 May 2017.  
36  
37  
38
- 39 47. Bertollini R, DiLallo D, Spadea T, Perucci C. Cesarean section rates in Italy by  
40  
41 hospital payment mode: an analysis based on birth certificates. *Am J Public Health.*  
42  
43 1992;82(2):257-61.  
44  
45  
46
- 47 48. Stafford RS. Cesarean section use and source of payment: An analysis of California  
48  
49 hospital discharge abstracts. *American Journal of Public Health.* 1990;80(3):313-5.  
50  
51  
52
- 53 49. de Jong JD, Westert GP, Noetscher CM, Groenewegen PP. Does managed care make  
54  
55 a difference? Physicians' length of stay decisions under managed and non-managed care.  
56  
57 *BMC Health Serv Res.* 2004;4(1):3.  
58  
59  
60

- 1  
2  
3 50. Wagstaff A. The demand for health: some new empirical evidence. *J Health Econ*.  
4 1986;5(3):195-233.  
5  
6  
7  
8  
9 51. Wagstaff A. The demand for health: theory and applications. *J Epidemiol Community*  
10 *Health*. 1986;40(1):1-11.  
11  
12  
13  
14 52. Haas JS, Udvarhelyi S, Epstein AM. The effect of health coverage for uninsured  
15 pregnant women on maternal health and the use of cesarean section. *JAMA*. 1993;270(1):61-  
16 4.  
17  
18  
19  
20  
21  
22 53. Einarsdottir K, Kemp A, Hagggar FA, Moorin RE, Gunnell AS, Preen DB, et al.  
23 Increase in caesarean deliveries after the Australian Private Health Insurance Incentive policy  
24 reforms. *PLoS One*. 2012;7(7):e41436.  
25  
26  
27  
28  
29  
30 54. Burke SA, Normand C, Barry S, Thomas S. From universal health insurance to  
31 universal healthcare? The shifting health policy landscape in Ireland since the economic  
32 crisis. *Health Policy*. 2016;120(3):235-40.  
33  
34  
35  
36  
37 55. Hsia RY, Akosa Antwi Y, Weber E. Analysis of variation in charges and prices paid  
38 for vaginal and caesarean section births: a cross-sectional study. *BMJ Open*.  
39 2014;4(1):e004017.  
40  
41  
42  
43  
44  
45 56. Brown JR, Sox HC, Goodman DC. Financial incentives to improve quality: skating to  
46 the puck or avoiding the penalty box? *JAMA*. 2014;311(10):1009-10.  
47  
48  
49  
50  
51  
52  
53  
54  
55  
56  
57  
58  
59  
60



Table 1. Characteristics of included studies

| Author          | Year | Country       | Study design         | Number of cases | Number of hospital units | Year of data collection | Population                                      | Sampling    | Type of CS analysed |
|-----------------|------|---------------|----------------------|-----------------|--------------------------|-------------------------|-------------------------------------------------|-------------|---------------------|
| Stafford        | 1990 | United States | Cross sectional      | 461066          | Not reported             | 1986                    | Primi- and multiparae; any risk                 | Consecutive | Any                 |
| Haas et al. A   | 1993 | United States | Cross sectional      | 57257           | Not reported             | 1984                    | Primi- and multiparae; any risk                 | Consecutive | Any                 |
| Haas et al. B   | 1993 | United States | Cross sectional      | 64346           | Not reported             | 1987                    | Primi- and multiparae; any risk                 | Consecutive | Any                 |
| Braveman et al. | 1995 | United States | Retrospective cohort | 213761          | Unclear                  | 1991                    | Primiparae; no previous CS; any risk            | Consecutive | Any                 |
| Burns et al.    | 1995 | United States | Cross sectional      | 33233           | 36                       | 1989                    | Primi- and multiparae; any risk                 | Consecutive | Any                 |
| Aron et al.     | 2000 | United States | Retrospective cohort | 25697           | 21                       | 1993-1995               | Primiparae; no previous CS; any risk            | Consecutive | Any                 |
| Grant A         | 2005 | United States | Cross sectional      | 9017            | n/a                      | 1988                    | Primi- and multiparae; any risk                 | Random      | Any                 |
| Grant B         | 2005 | United States | Cross sectional      | 147821          | n/a                      | 1992                    | Primi- and multiparae; any risk                 | Consecutive | Any                 |
| Grant C         | 2005 | United States | Cross sectional      | 136763          | n/a                      | 1995                    | Primi- and multiparae; any risk                 | Consecutive | Any                 |
| Korst et al.    | 2005 | United States | Cross sectional      | 327632          | 288                      | 1995                    | Primi- and multiparae; no previous CS; any risk | Consecutive | Emergency           |
| Misra           | 2008 | United States | Cross sectional      | 128743          | Not reported             | 1995, 2000              | Primi- and multiparae; no previous CS; any risk | Consecutive | Emergency           |
| Coonrod et al.  | 2008 | United States | Cross sectional      | 28863           | 40                       | 2005                    | Primiparae; low risk                            | Consecutive | Any                 |
| Huesch          | 2011 | United States | Cross sectional      | 182108          | Not reported             | 2004-2007               | Primi- and multiparae; no previous CS; low risk | Consecutive | Planned             |

|                          |      |               |                      |         |              |           |                                                 |             |           |
|--------------------------|------|---------------|----------------------|---------|--------------|-----------|-------------------------------------------------|-------------|-----------|
| Movsas et al.            | 2012 | United States | Retrospective cohort | 617269  | NA           | 2004-2008 | Primi- and multiparae; any risk                 | Consecutive | Any       |
| Kozhimannil et al.       | 2013 | United States | Cross sectional      | 6717486 | Over 1000    | 2002-2009 | Primi- and multiparae; any risk                 | Random      | Any       |
| Lutomski et al.          | 2014 | Ireland       | Retrospective cohort | 403642  | 19           | 2005-2010 | Primi- and multiparae; any risk                 | Consecutive | Any       |
| Huesch et al.            | 2014 | United States | Cross sectional      | 408355  | 254          | 2010      | Primi- and multiparae; no previous CS; any risk | Consecutive | Planned   |
| Henke et al.             | 2014 | United States | Cross sectional      | 2516570 | Not reported | 2009      | Primi- and multiparae; no previous CS; low risk | Consecutive | Any       |
| Bannister-Tyrrell et al. | 2015 | Australia     | Cross sectional      | 20247   | 51           | 2007-2011 | Primi- and multiparae; high risk                | Consecutive | Any       |
| Sebastião et al.         | 2016 | United States | Retrospective cohort | 412192  | 122          | 2004-2011 | Primiparae; no previous CS; low risk            | Consecutive | Emergency |
| Sentell et al.           | 2016 | United States | Cross sectional      | 11419   | 4            | 2012      | Primi- and multiparae; any risk                 | Consecutive | Any       |

CS = caesarean section

## Figure legends

Figure 1. The flow diagram of review

Figure 2. Adjusted odds ratios of caesarean section

Figure 3. Stratified analyses/Legend: \*P for trend

Figure 4. Crude odds ratios of caesarean section

## Supporting information

S1 - Appendix 1. Reported exclusion criteria

S2 - Appendix 2. Characteristics of data used for analysis

S3 - Appendix 3. Covariates used for statistical adjustment

S4 - Appendix 4. Funnel plot of adjusted ORs against their standard errors on a log scale

S5 - Appendix 5. Caesarean section rates in United States

S6 - Appendix 6. Sensitivity analysis - Adjusted odds ratios of caesarean section

S7 - Appendix 7. Sensitivity analysis – stratified analyses/Legend: \*P for trend

S8 - Appendix 8. Sensitivity analysis - Crude odds ratios of caesarean section

S9 – Appendix 9. Search strategy

S10 – Appendix 10. PRISMA checklist

S11 – Appendix 11. Research Checklist

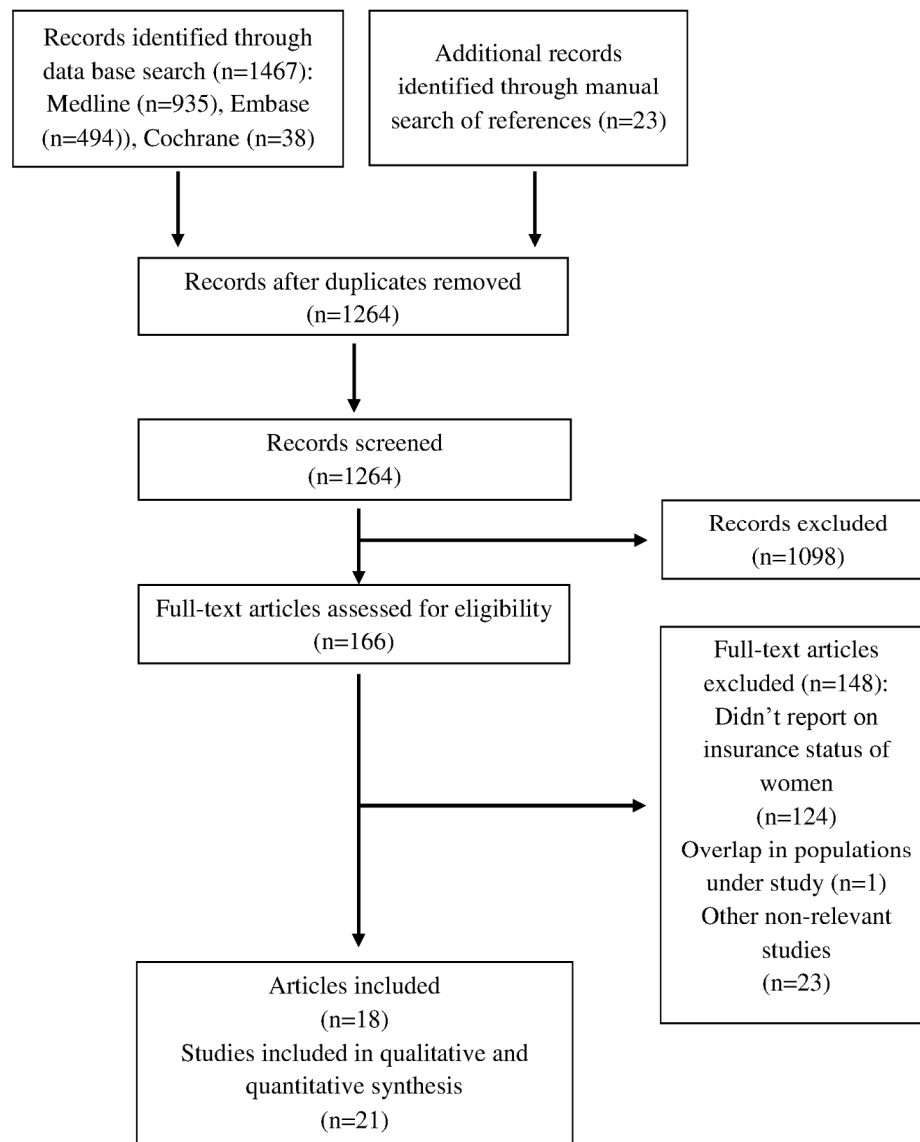

Figure 1. The flow diagram of review

164x201mm (300 x 300 DPI)

1  
2  
3  
4  
5  
6  
7  
8  
9  
10  
11  
12  
13  
14  
15  
16  
17  
18  
19  
20  
21  
22  
23  
24  
25  
26  
27  
28  
29  
30  
31  
32  
33  
34  
35  
36  
37  
38  
39  
40  
41  
42  
43  
44  
45  
46  
47  
48  
49  
50  
51  
52  
53  
54  
55  
56  
57  
58  
59  
60

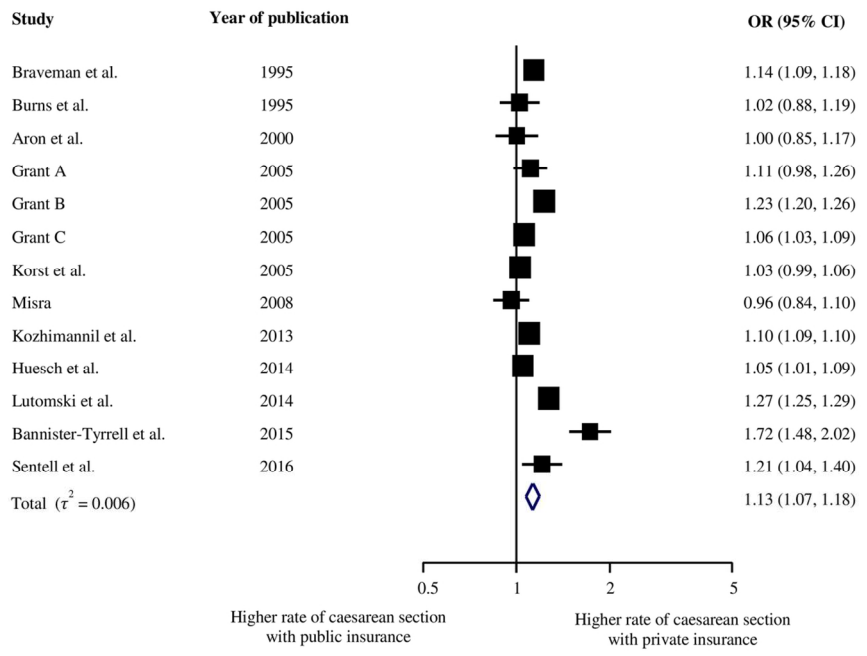

Figure 2. Adjusted odds ratios of caesarean section

118x83mm (300 x 300 DPI)

ew only

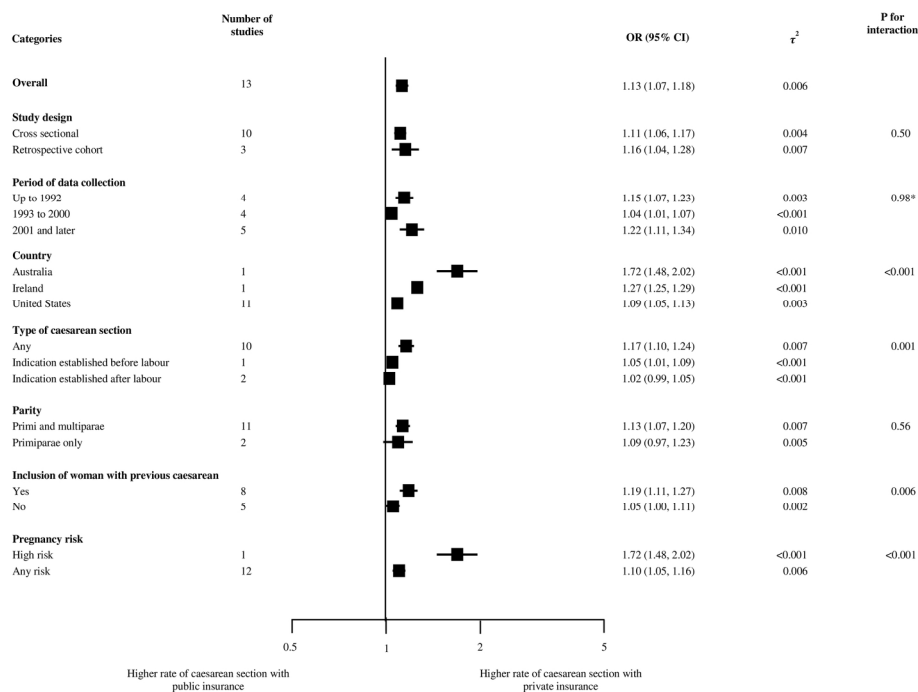

Figure 3. Stratified analyses/Legend: \*P for trend

182x129mm (300 x 300 DPI)

1  
2  
3  
4  
5  
6  
7  
8  
9  
10  
11  
12  
13  
14  
15  
16  
17  
18  
19  
20  
21  
22  
23  
24  
25  
26  
27  
28  
29  
30  
31  
32  
33  
34  
35  
36  
37  
38  
39  
40  
41  
42  
43  
44  
45  
46  
47  
48  
49  
50  
51  
52  
53  
54  
55  
56  
57  
58  
59  
60

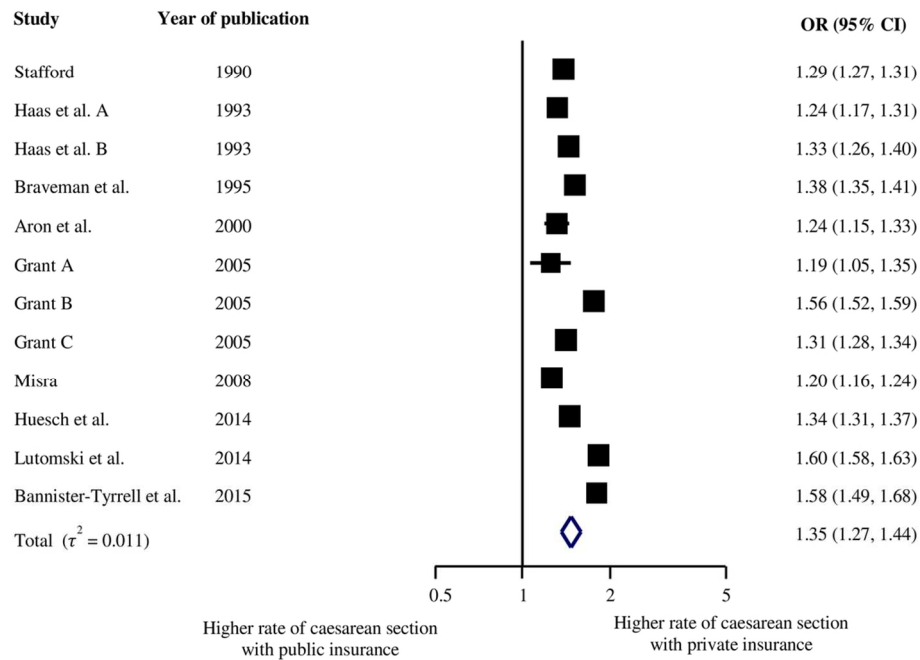

Figure 4. Crude odds ratios of caesarean section

108x76mm (300 x 300 DPI)

Appendix 1. Reported exclusion criteria

| Authors                  | Year | Source population                            | Maternal characteristics |                             |            |                            |                                          | Fetus characteristics |                                |                           |                     |                       | Cases with missing data | Provider characteristics | Other factors |                                    |                                          |
|--------------------------|------|----------------------------------------------|--------------------------|-----------------------------|------------|----------------------------|------------------------------------------|-----------------------|--------------------------------|---------------------------|---------------------|-----------------------|-------------------------|--------------------------|---------------|------------------------------------|------------------------------------------|
|                          |      |                                              | Age ≤14                  | Racial or ethnic minorities | Multiparae | Previous caesarean section | Other risk factors for caesarean section | Stillbirth            | Multiple births (twin or more) | Newborn weighting <500 gr | Breach presentation | Other malpresentation |                         |                          |               | Preterm birth (less than 37 weeks) | Other risk factors for caesarean section |
| Stafford                 | 1990 | All births in California, United States      |                          |                             |            |                            |                                          |                       |                                |                           |                     |                       |                         |                          |               |                                    | +                                        |
| Haas et al. A            | 1993 | All births in Massachusetts, United States   |                          |                             |            |                            |                                          |                       |                                |                           |                     |                       |                         |                          |               |                                    | +                                        |
| Haas et al. B            | 1993 | All births in Massachusetts, United States   |                          |                             |            |                            |                                          |                       |                                |                           |                     |                       |                         |                          |               |                                    | +                                        |
| Braveman et al.          | 1995 | All births in California, United States      |                          |                             | +          | +                          |                                          |                       |                                |                           |                     |                       |                         |                          |               |                                    | +                                        |
| Burns et al.             | 1995 | All births in Arizona, United States         |                          |                             |            |                            |                                          |                       |                                |                           |                     |                       |                         |                          |               |                                    | +                                        |
| Aron et al.              | 2000 | All births in Cleveland, Ohio, United States |                          |                             |            | +                          |                                          |                       |                                |                           |                     |                       |                         |                          |               |                                    | +                                        |
| Grant A                  | 2005 | All births, United States                    |                          |                             |            |                            |                                          |                       |                                |                           |                     |                       |                         |                          |               |                                    | +                                        |
| Grant B                  | 2005 | All births in Florida, United States         |                          |                             |            |                            |                                          |                       |                                |                           |                     |                       |                         |                          |               |                                    | +                                        |
| Grant C                  | 2005 | All births in Florida, United States         |                          |                             |            |                            |                                          |                       |                                |                           |                     |                       |                         |                          |               |                                    | +                                        |
| Korst et al.             | 2005 | All births in California, United States      |                          |                             |            | +                          | +                                        |                       |                                |                           |                     |                       |                         |                          |               |                                    | +                                        |
| Misra                    | 2008 | All births in Maryland, United States        |                          |                             |            | +                          |                                          |                       |                                |                           |                     |                       |                         |                          |               |                                    | +                                        |
| Coonrod et al.           | 2008 | All births in Arizona, United States         |                          | +                           | +          |                            |                                          |                       |                                |                           |                     |                       |                         |                          |               |                                    | +                                        |
| Huesch                   | 2011 | All births in New Jersey, United States      |                          |                             |            | +                          | +                                        |                       |                                |                           |                     |                       |                         |                          |               |                                    | +                                        |
| Movsas et al.            | 2012 | All births in Michigan, United States        |                          |                             |            |                            |                                          |                       |                                |                           |                     |                       |                         |                          |               |                                    | +                                        |
| Kozhimannil et al.       | 2013 | All births in 44 states, United States       |                          |                             |            |                            |                                          |                       |                                |                           |                     |                       |                         |                          |               |                                    | +                                        |
| Lutomski et al.          | 2014 | All births, Ireland                          |                          |                             |            |                            |                                          |                       |                                |                           |                     |                       |                         |                          |               |                                    | +                                        |
| Huesch et al.            | 2014 | All births in California, United States      | +                        |                             |            | +                          |                                          |                       |                                |                           |                     |                       |                         |                          |               |                                    | +                                        |
| Henke et al.             | 2014 | All births in 44 states, United States       |                          |                             |            | +                          |                                          |                       |                                |                           |                     |                       |                         |                          |               |                                    | +                                        |
| Bannister-Tyrrell et al. | 2015 | All births in New South Wales, Australia     |                          |                             |            |                            |                                          |                       |                                |                           |                     |                       |                         |                          |               |                                    | +                                        |
| Sebastião et al.         | 2016 | All births in Florida, United States         |                          |                             | +          | +                          |                                          |                       |                                |                           |                     |                       |                         |                          |               |                                    | +                                        |
| Sentell et al.           | 2016 | All births in Hawaii, United States          |                          |                             |            |                            |                                          |                       |                                |                           |                     |                       |                         |                          |               |                                    | +                                        |

\*500 or less grams



## Appendix 2. Characteristics of data used for analysis

| Author                   | Year | Survey | Hospital records | Birth certificates/registry | Census data |
|--------------------------|------|--------|------------------|-----------------------------|-------------|
| Stafford                 | 1990 |        | +                |                             |             |
| Haas et al. A            | 1993 |        | +                | +                           |             |
| Haas et al. B            | 1993 |        | +                | +                           |             |
| Braveman et al.          | 1995 |        |                  | +                           | +           |
| Burns et al.             | 1995 |        | +                | +                           |             |
| Aron et al.              | 2000 |        | +                |                             |             |
| Grant A                  | 2005 | +      |                  |                             |             |
| Grant B                  | 2005 |        | +                |                             |             |
| Grant C                  | 2005 |        | +                |                             |             |
| Korst et al.             | 2005 |        | +                |                             |             |
| Misra                    | 2008 |        | +                |                             |             |
| Coonrod et al.           | 2008 |        |                  | +                           |             |
| Huesch                   | 2011 |        | +                |                             |             |
| Movsas et al.            | 2012 |        | +                | +                           |             |
| Kozhimannil et al.       | 2013 |        | +                |                             |             |
| Lutomski et al.          | 2014 |        | +                |                             |             |
| Huesch et al.            | 2014 |        | +                |                             |             |
| Henke et al.             | 2014 |        | +                |                             |             |
| Bannister-Tyrrell et al. | 2015 |        | +                |                             |             |
| Sebastião et al.         | 2016 |        | +                | +                           |             |
| Sentell et al.           | 2016 |        | +                |                             |             |

Appendix 3. Covariates used for statistical adjustment

| Author                   | Year | Maternal preconception status |                   |                |                 |                   |              |        | Maternal clinical status |                 |     |        | Foetus characteristics     |                                            |                                       | Prenatal care | Birth characteristics | Provider characteristics | Other variables | Total number of covariates |                 |              |
|--------------------------|------|-------------------------------|-------------------|----------------|-----------------|-------------------|--------------|--------|--------------------------|-----------------|-----|--------|----------------------------|--------------------------------------------|---------------------------------------|---------------|-----------------------|--------------------------|-----------------|----------------------------|-----------------|--------------|
|                          |      | Ethnicity/Race                | Educational level | Marital status | Economic status | Insurances status | Urban status | Weight | Height                   | Body mass index | Age | Parity | Previous caesarean section | Pre-existing (before pregnancy) conditions | Conditions developed during pregnancy |               |                       |                          |                 |                            | Gestational age | Birth weight |
| Stafford*                | 1990 |                               |                   |                |                 |                   |              |        |                          |                 |     |        |                            |                                            |                                       |               |                       |                          |                 |                            | 0               |              |
| Haas et al. A*           | 1993 |                               |                   |                |                 |                   |              |        |                          |                 |     |        |                            |                                            |                                       |               |                       |                          |                 |                            |                 | 0            |
| Haas et al. B*           | 1993 |                               |                   |                |                 |                   |              |        |                          |                 |     |        |                            |                                            |                                       |               |                       |                          |                 |                            |                 | 0            |
| Braveman et al.          | 1995 | +                             | +                 | +              | +               | +                 |              |        |                          | +               |     |        | +                          |                                            | +                                     | +             | +                     | +                        | ++              | +                          | 15              |              |
| Burns et al.             | 1995 | +                             | +                 |                |                 |                   |              |        |                          | +               | +   | +      | ++                         | ++                                         | +                                     | +             | ++                    | +                        | ++              | ++                         | 33              |              |
| Aron et al.              | 2000 |                               |                   |                |                 |                   |              |        |                          | +               | +   |        | ++                         | ++                                         | ++                                    | +             | ++                    |                          | ++              | ++                         | 39              |              |
| Grant A                  | 2005 | ++                            | +                 | +              | +               |                   | +            | +      | +                        | ++              |     | +      | ++                         | ++                                         | +                                     | ++            | ++                    | ++                       | ++              | ++                         | 68              |              |
| Grant B                  | 2005 | ++                            |                   |                |                 |                   | +            |        |                          | ++              |     | +      | ++                         | ++                                         | +                                     | ++            | ++                    | +                        | ++              | +                          | 31              |              |
| Grant C                  | 2005 | ++                            |                   |                |                 |                   | +            |        |                          | ++              |     | +      | ++                         | ++                                         | +                                     | ++            | ++                    | +                        | ++              | +                          | 31              |              |
| Korst et al.             | 2005 | +                             |                   |                |                 |                   |              |        |                          | +               |     |        | +                          | ++                                         | ++                                    | +             | ++                    | ++                       | ++              | ++                         | 6               |              |
| Misra                    | 2008 | +                             |                   |                |                 |                   |              |        |                          | ++              |     | ++     | ++                         |                                            |                                       | ++            |                       | +                        | ++              | ++                         | 30              |              |
| Coonrod et al.           | 2008 | +                             | +                 |                |                 |                   |              |        |                          | +               |     | ++     | +                          | +                                          | +                                     | +             | +                     | +                        | ++              | ++                         | 20              |              |
| Huesch                   | 2011 | +                             |                   | +              |                 |                   | +            |        |                          | +               |     |        | ++                         | ++                                         |                                       |               |                       |                          | +               | ++                         | 8               |              |
| Movsas et al.            | 2012 | +                             |                   |                |                 |                   |              |        |                          | +               | +   |        | +                          | ++                                         | ++                                    | +             | +                     | +                        |                 | +                          | 9               |              |
| Kozhimannil et al.       | 2013 | +                             |                   |                |                 |                   |              |        |                          | +               | +   | +      | ++                         | ++                                         | +                                     |               | ++                    |                          | ++              |                            | 16              |              |
| Lutomski et al.          | 2014 |                               |                   |                |                 |                   |              |        |                          | +               |     | +      | ++                         | ++                                         | +                                     |               | +                     |                          |                 |                            | 6               |              |
| Huesch et al.            | 2014 | +                             |                   |                | +               |                   |              |        |                          | +               |     |        | ++                         | ++                                         | +                                     | ++            | +                     | ++                       | ++              | ++                         | 124             |              |
| Henke et al.             | 2014 | +                             | +                 |                | +               |                   |              |        |                          | +               |     |        | ++                         | ++                                         | +                                     |               |                       | ++                       | ++              | ++                         | 28              |              |
| Bannister-Tyrrell et al. | 2015 |                               |                   |                |                 |                   |              |        |                          |                 | +   | +      | ++                         | ++                                         | +                                     |               | +                     | ++                       | +               | +                          | 12              |              |
| Sebastião et al.         | 2016 | +                             |                   | +              |                 |                   |              |        |                          | +               | +   |        | +                          | ++                                         | ++                                    | +             |                       | +                        | ++              | ++                         | 10              |              |
| Sentell et al.           | 2016 | +                             |                   |                |                 |                   |              |        |                          | +               | +   |        | +                          | ++                                         | ++                                    | +             |                       | +                        | ++              | ++                         | 6               |              |

+ One covariate adjusted for ++ Two or more covariates adjusted for

\*Stafford and Haas et al. only reported crude estimates.

Appendix 4. Funnel plot of adjusted ORs against their standard errors on a log scale

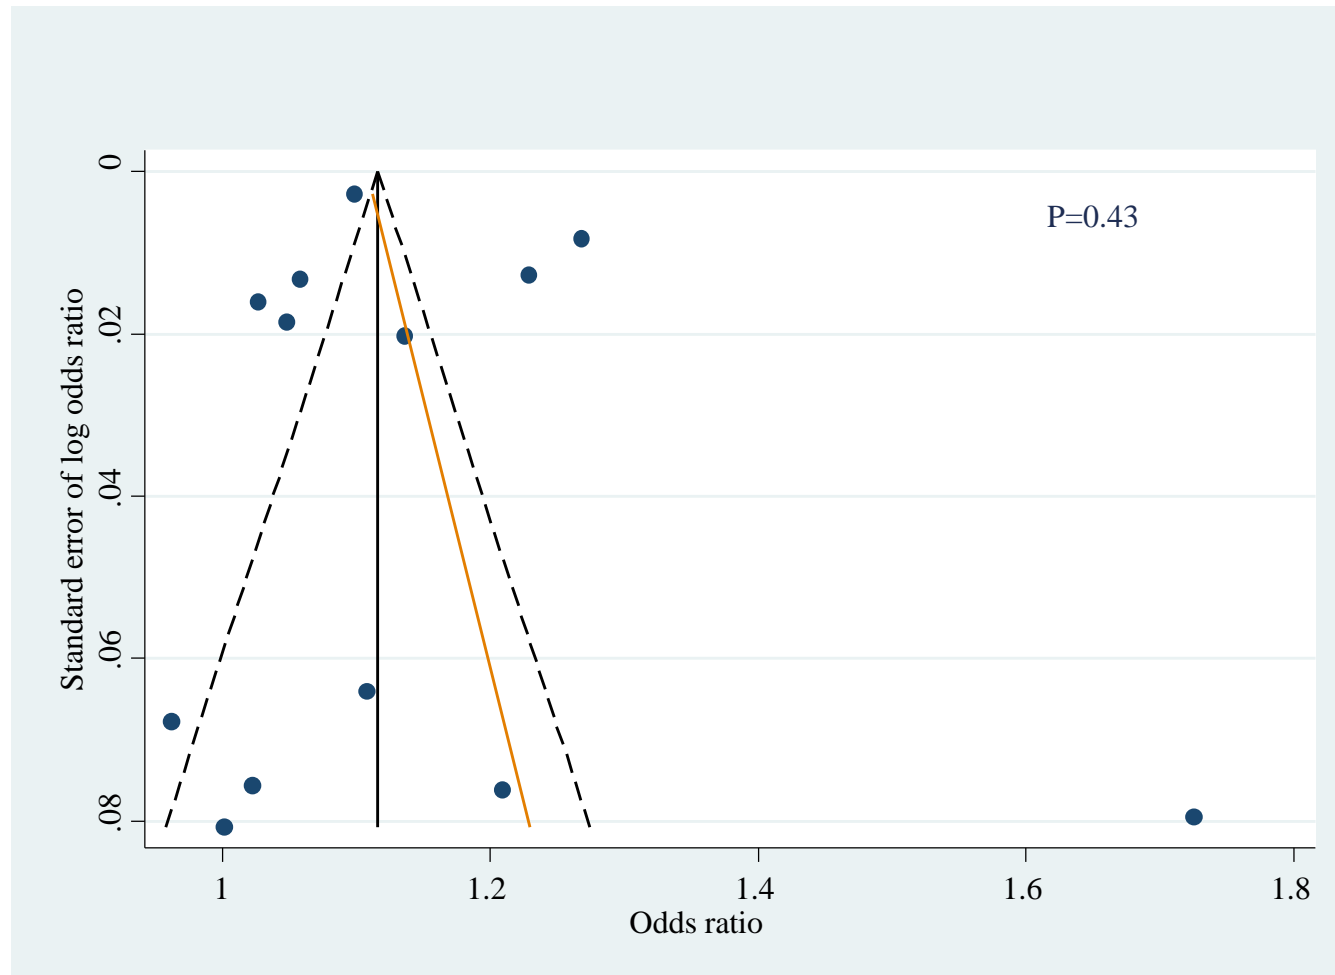

## Appendix 5. Caesarean section rates in United States

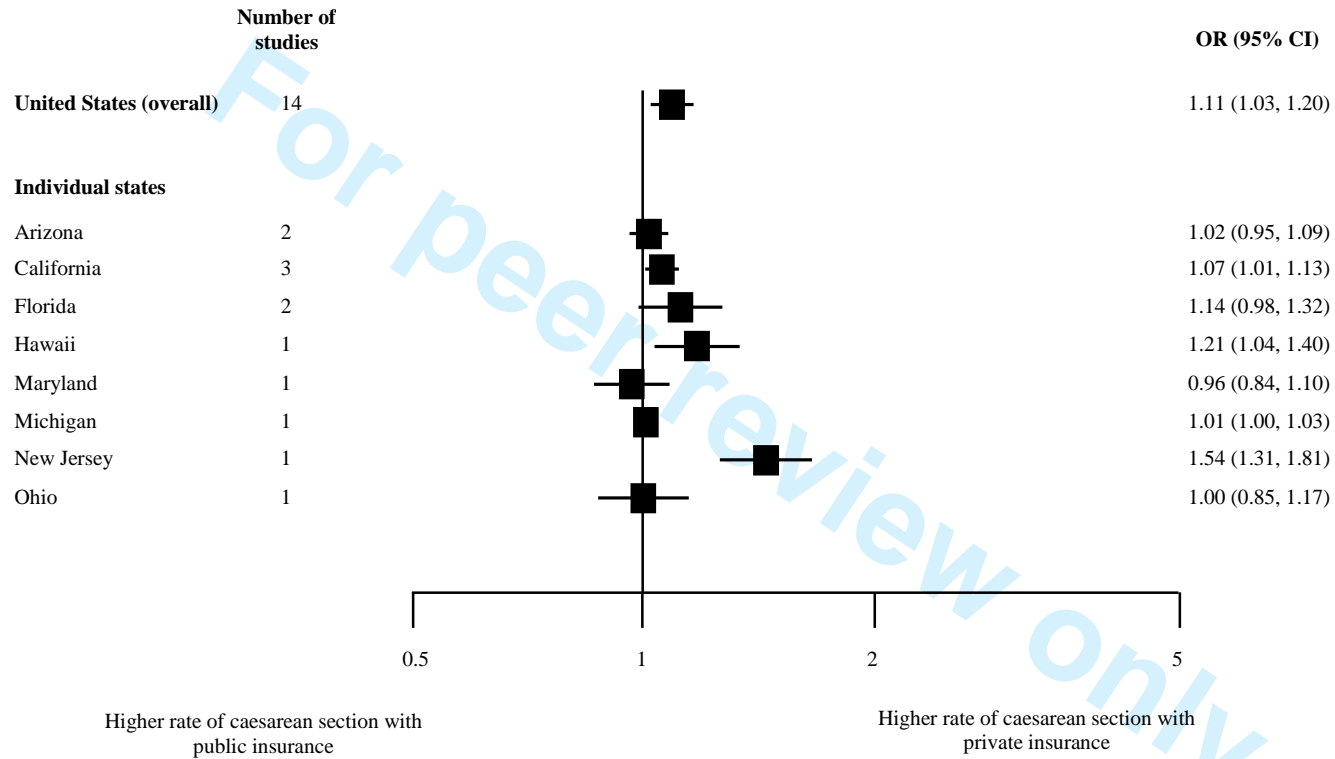

1  
2  
3  
4  
5  
6  
7  
8  
9  
10  
11  
12  
13  
14  
15  
16  
17  
18  
19  
20  
21  
22  
23  
24  
25  
26  
27  
28  
29  
30  
31  
32  
33  
34  
35  
36  
37  
38  
39  
40  
41  
42  
43  
44  
45  
46  
47

### Appendix 6. Sensitivity analysis - Adjusted odds ratios of caesarean section

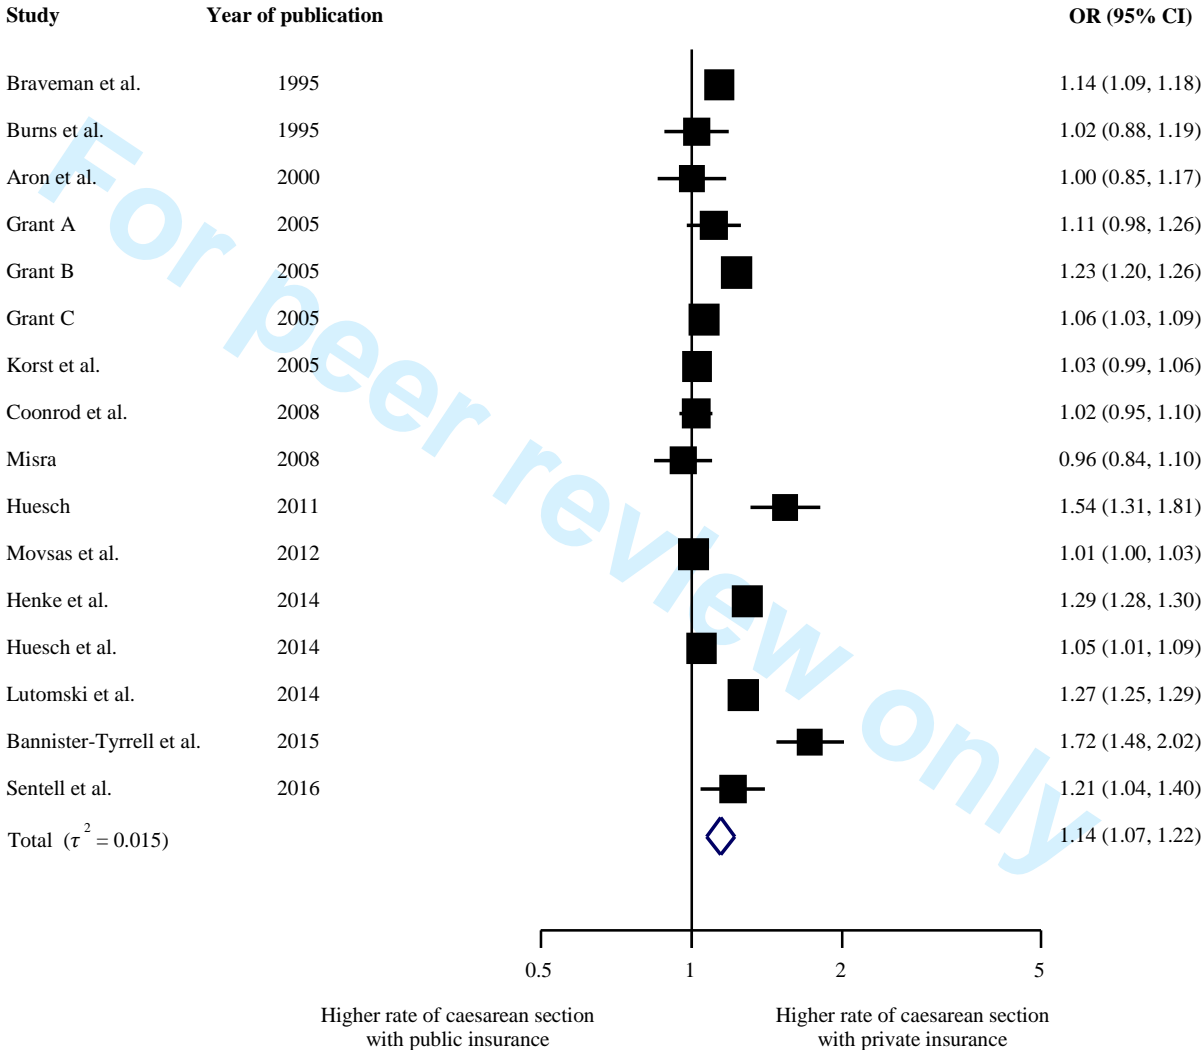

# Appendix 7. Sensitivity analysis – stratified analyses

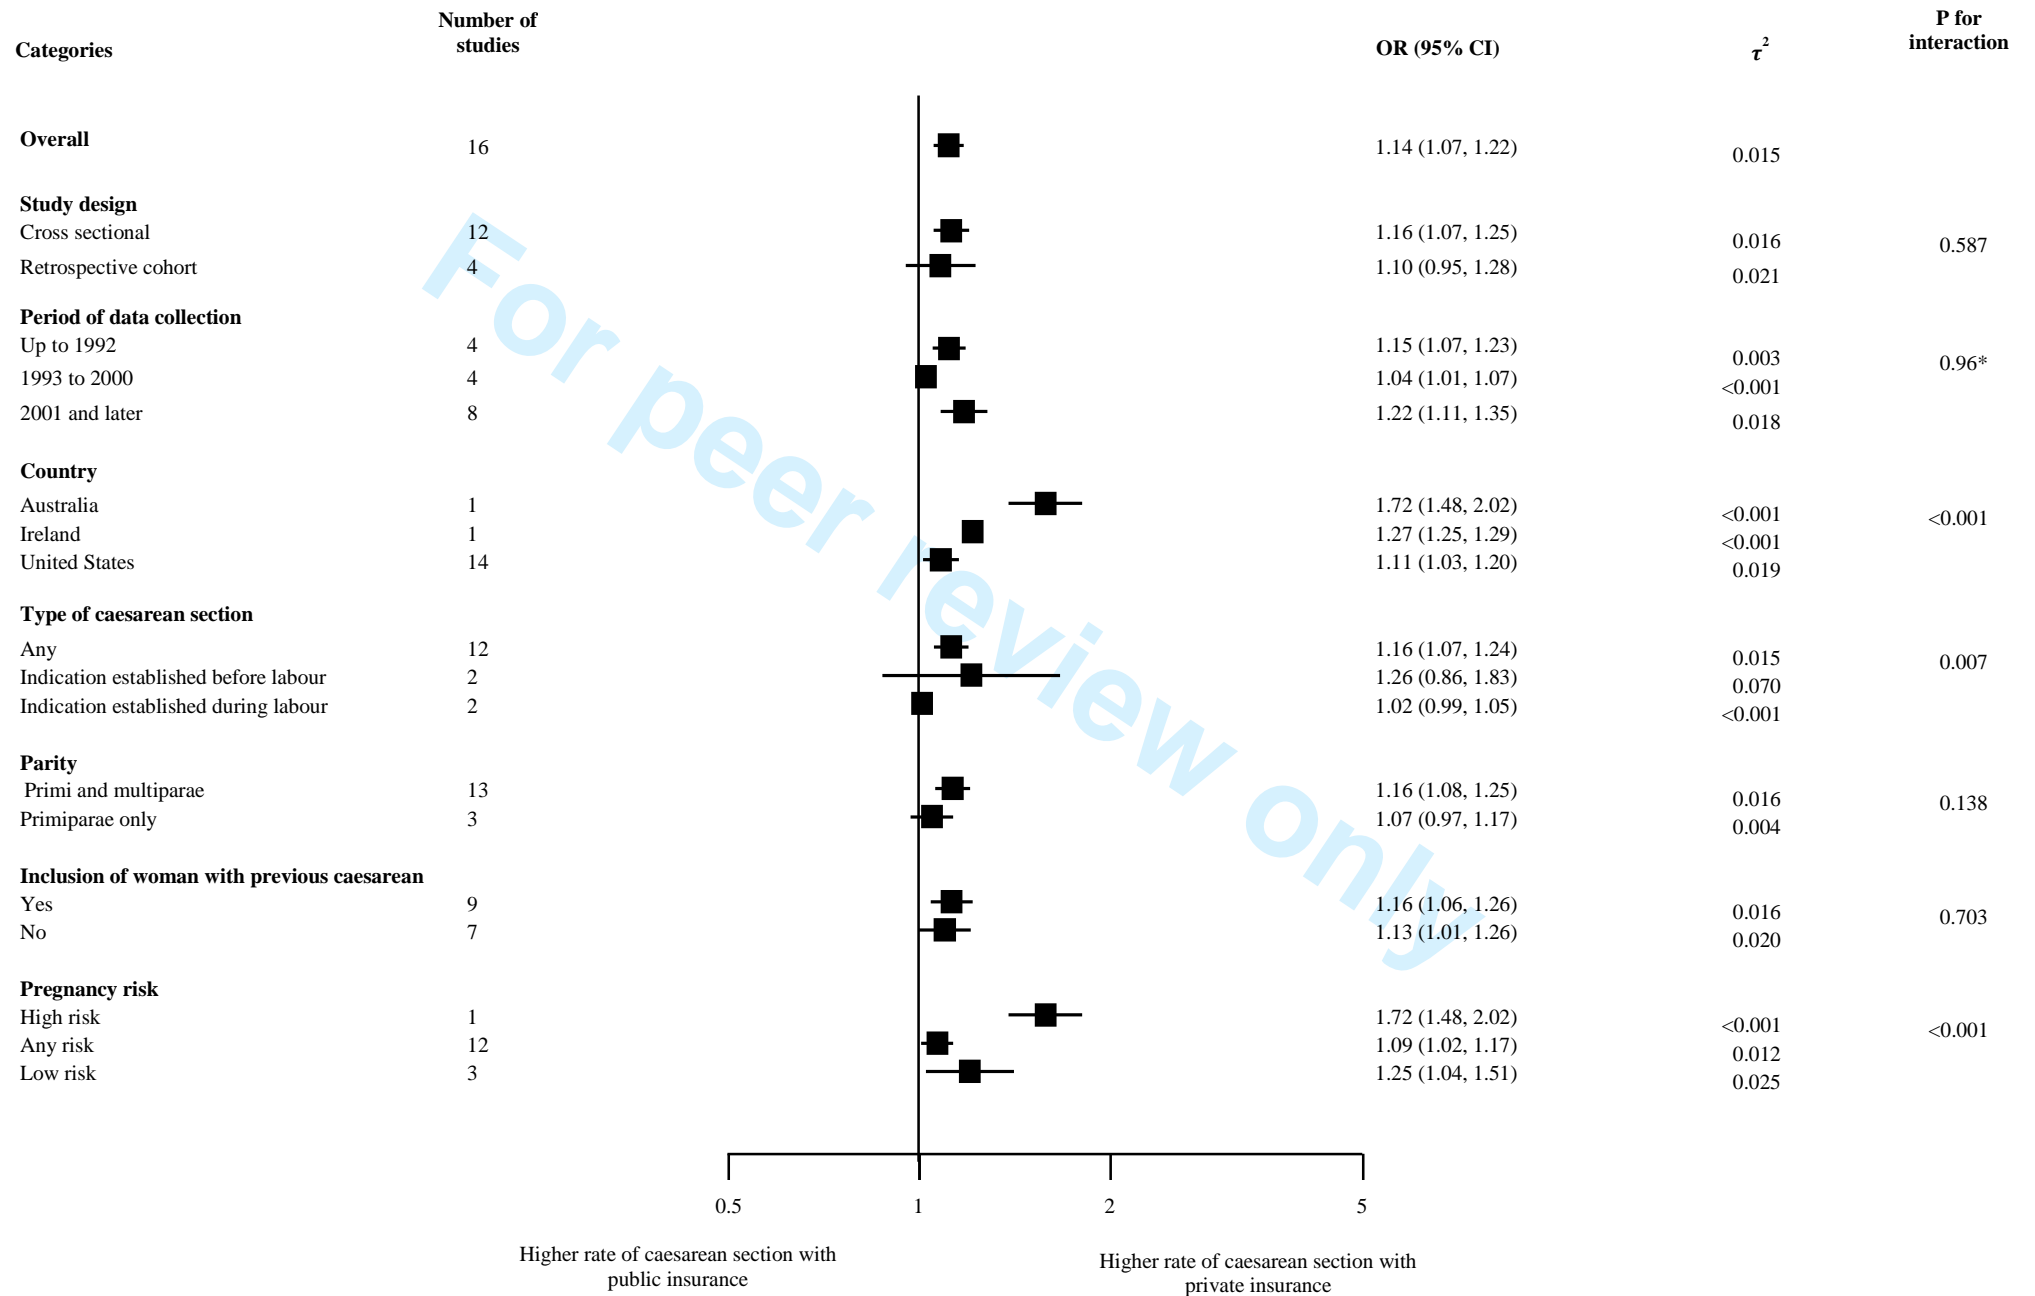

# Appendix 8. Sensitivity analysis - Crude odds ratios of caesarean section

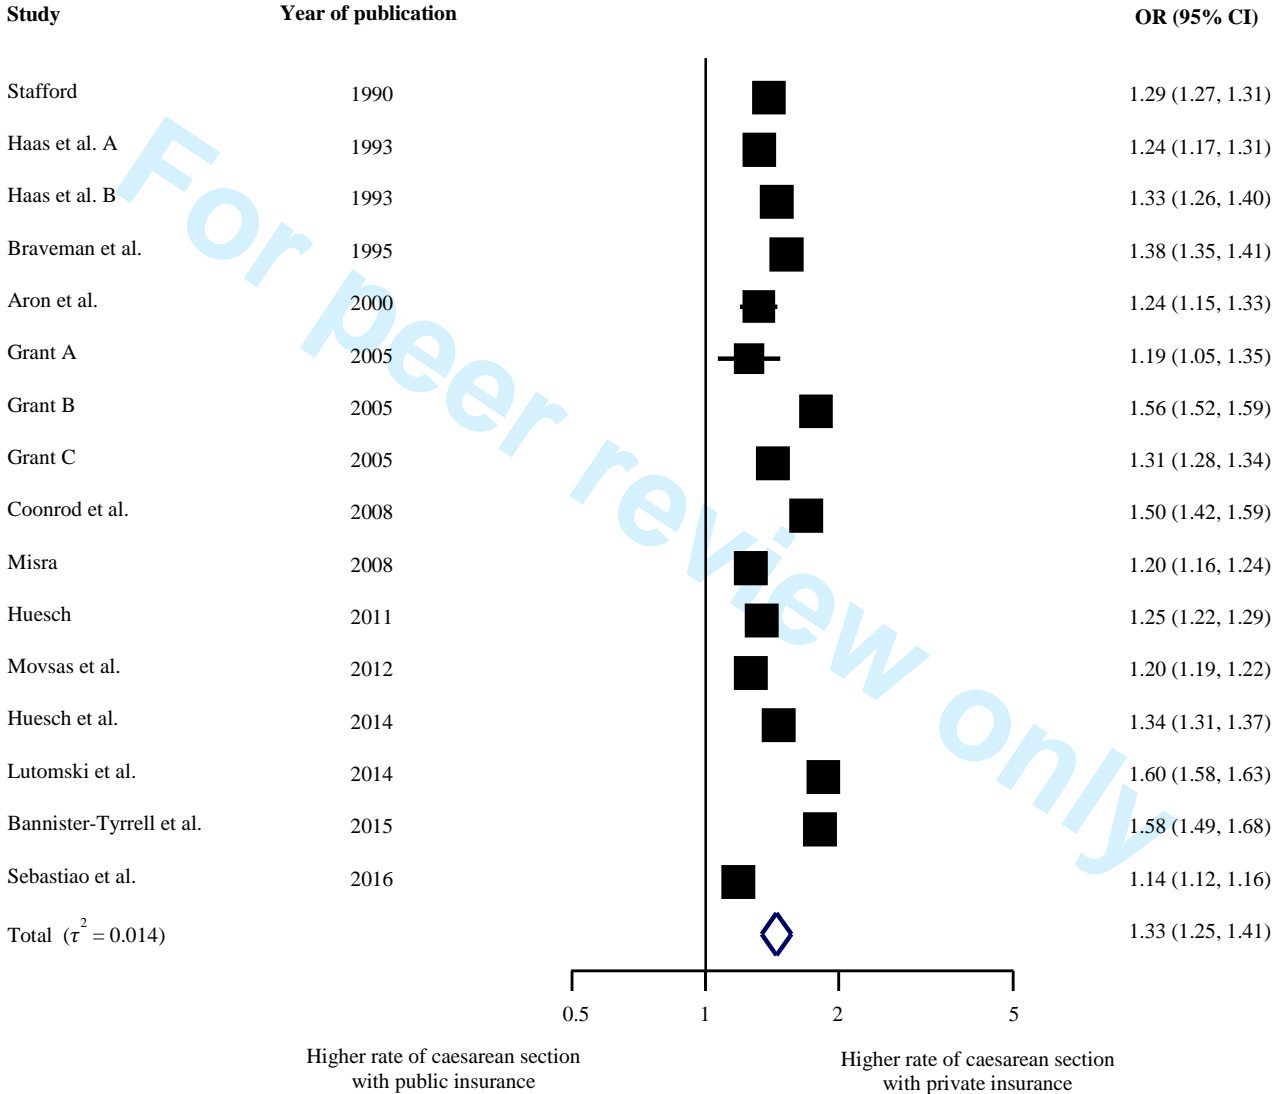

## Appendix 9. Search Strategy

### 1. For Medline (PubMed)

((((((causes OR determinants OR statistics OR rates OR factors OR decision\* OR physician\* OR socioeconomic OR state medicine OR evidence-based OR hospital OR hospitals OR hospitalization OR hospitalized OR uncertain\* OR educational status OR social class OR obstetric\* OR gynecolog\* OR supply OR distribut\* OR utilization OR insurance OR choice OR attitude OR patient OR economics OR maternal OR accessib\* OR health service\* OR rural population OR urban population[Title/Abstract])) NOT medline[sb])) OR ("Decision Making"[Mesh] OR "Physician's Practice Patterns"[Mesh] OR "Socioeconomic Factors"[Mesh] OR "State Medicine"[Mesh] OR "Evidence-Based Medicine"[Mesh] OR "Hospitals"[Mesh] OR "Uncertainty"[Mesh] OR "Educational Status"[Mesh] OR "Hospital Costs"[Mesh] OR "Physician Incentive Plans"[Mesh] OR "Social Class"[Mesh] OR "Obstetrics and Gynecology Department, Hospital"[Mesh] OR "supply and distribution"[Subheading] OR "utilization"[Subheading] OR "Insurance"[Mesh] OR "Choice Behavior"[Mesh] OR "Attitude to Health"[Mesh] OR "Patient Participation"[Mesh] OR "Physician-Patient Relations"[Mesh] OR "Economics, Hospital"[Mesh] OR "Maternal Health Services"[Mesh] OR "Health Services Accessibility"[Mesh] OR "Health Services Research"[Mesh] OR "Rural Population"[Mesh] OR "Urban Population"[Mesh])) OR factors OR rates OR statistics OR causes OR determinants AND (((operative delivery OR caesarean section OR cesarean section OR c-section OR c section OR caesarean OR cesarean OR caesarean delivery OR cesarean delivery OR caesarean rates OR cesarean rates)))) OR cesarean section [MeSH Terms])) AND (((("Catchment Area (Health)"[Mesh] OR "Small-Area Analysis"[Mesh])) OR (((small area analysis OR small area analyses OR medical practice variation OR regions OR geographic variation OR variation))))))

### 2. Embase (Ovid SP)

| #  | Searches                                                                                                                                   | Results | Search Type | Actions                               |
|----|--------------------------------------------------------------------------------------------------------------------------------------------|---------|-------------|---------------------------------------|
| 1  | decision making/                                                                                                                           | 134077  | Advanced    | Display <a href="#">More &gt;&gt;</a> |
| 2  | professional practice/ or group practice/ or health care practice/ or medical practice/                                                    | 129049  | Advanced    | Display <a href="#">More &gt;&gt;</a> |
| 3  | socioeconomics/                                                                                                                            | 110558  | Advanced    | Display <a href="#">More &gt;&gt;</a> |
| 4  | state medicine.mp. or national health service/                                                                                             | 54605   | Advanced    | Display <a href="#">More &gt;&gt;</a> |
| 5  | evidence based medicine/                                                                                                                   | 80825   | Advanced    | Display <a href="#">More &gt;&gt;</a> |
| 6  | hospital/                                                                                                                                  | 216188  | Advanced    | Display <a href="#">More &gt;&gt;</a> |
| 7  | uncertainty/                                                                                                                               | 6158    | Advanced    | Display <a href="#">More &gt;&gt;</a> |
| 8  | educational status/                                                                                                                        | 36032   | Advanced    | Display <a href="#">More &gt;&gt;</a> |
| 9  | "hospital cost"/                                                                                                                           | 13192   | Advanced    | Display <a href="#">More &gt;&gt;</a> |
| 10 | physician incentive plans.mp. or personnel management/                                                                                     | 49572   | Advanced    | Display <a href="#">More &gt;&gt;</a> |
| 11 | social class/                                                                                                                              | 26291   | Advanced    | Display <a href="#">More &gt;&gt;</a> |
| 12 | hospital department/                                                                                                                       | 21809   | Advanced    | Display <a href="#">More &gt;&gt;</a> |
| 13 | obstetrics/                                                                                                                                | 27326   | Advanced    | Display <a href="#">More &gt;&gt;</a> |
| 14 | gynecology/                                                                                                                                | 29917   | Advanced    | Display <a href="#">More &gt;&gt;</a> |
| 15 | For peer review only - <a href="http://bmjopen.bmj.com/site/about/guidelines.xhtml">http://bmjopen.bmj.com/site/about/guidelines.xhtml</a> |         | Advanced    | Display <a href="#">More &gt;&gt;</a> |



|    |    |                                                                                                                                                                                                            |            |                 |                              |
|----|----|------------------------------------------------------------------------------------------------------------------------------------------------------------------------------------------------------------|------------|-----------------|------------------------------|
| 1  | 16 | 12 and 15                                                                                                                                                                                                  | 413        | Advanced        | Display<br>More >>           |
| 2  | 17 | health care distribution/                                                                                                                                                                                  | 2333       | Advanced        | Display<br>More >>           |
| 3  | 18 | health care utilization/                                                                                                                                                                                   | 36879      | Advanced        | Display<br>More >>           |
| 4  | 19 | insurance/                                                                                                                                                                                                 | 33934      | Advanced        | Display<br>More >>           |
| 5  | 20 | choice behavior.mp.                                                                                                                                                                                        | 765        | Advanced        | Display<br>More >>           |
| 6  | 21 | attitude to health/                                                                                                                                                                                        | 81021      | Advanced        | Display<br>More >>           |
| 7  | 22 | patient participation/                                                                                                                                                                                     | 16400      | Advanced        | Display<br>More >>           |
| 8  | 23 | doctor patient relation/                                                                                                                                                                                   | 81043      | Advanced        | Display<br>More >>           |
| 9  | 24 | health economics/                                                                                                                                                                                          | 33098      | Advanced        | Display<br>More >>           |
| 10 | 25 | obstetric procedure/                                                                                                                                                                                       | 550        | Advanced        | Display<br>More >>           |
| 11 | 26 | health care access/                                                                                                                                                                                        | 34433      | Advanced        | Display                      |
| 12 | 27 | health services research/                                                                                                                                                                                  | 27579      | Advanced        | Display<br>More >>           |
| 13 | 28 | geographic distribution/                                                                                                                                                                                   | 132846     | Advanced        | Display<br>More >>           |
| 14 | 29 | rural population/                                                                                                                                                                                          | 30219      | Advanced        | Display<br>More >>           |
| 15 | 30 | urban population/                                                                                                                                                                                          | 35323      | Advanced        | Display<br>More >>           |
| 16 | 31 | causes/                                                                                                                                                                                                    | 0          | Advanced        | Delete<br>More >>            |
| 17 | 32 | determinants/                                                                                                                                                                                              | 1          | Advanced        | Display<br>More >>           |
| 18 | 33 | statistics/                                                                                                                                                                                                | 301146     | Advanced        | Display<br>More >>           |
| 19 | 34 | rates/                                                                                                                                                                                                     | 0          | Advanced        | Delete<br>More >>            |
| 20 | 35 | factors/                                                                                                                                                                                                   | 0          | Advanced        | Delete<br>More >>            |
| 21 | 36 | 1 or 2 or 3 or 4 or 5 or 6 or 7 or 8 or 9 or 10 or 11 or 16 or 17 or 18 or 19 or 20 or 21 or 22 or 23 or 24 or 25 or 26 or 27 or 29 or 30 or 32 or 33                                                      | 1340916    | Advanced        | Display<br>More >>           |
| 22 | 37 | cesarean section/                                                                                                                                                                                          | 59755      | Advanced        | Display<br>More >>           |
| 23 | 38 | (caesarean section or cesarean section or c-section or c section or caesarean or cesarean or caesarean delivery or cesarean delivery or caesarean rates or cesarean rates or operative delivery).ti,ab,tw. | 53950      | Advanced        | Display<br>Delete<br>More >> |
| 24 | 39 | 37 or 38                                                                                                                                                                                                   | 73014      | Advanced        | Display<br>More >>           |
| 25 | 40 | (small area analysis or small area analyses or small aera or medical practice variation or regions or geographic variation or variation or variations).ti,ab,tw.                                           | 964890     | Advanced        | Display<br>More >>           |
| 26 | 41 | 28 or 40                                                                                                                                                                                                   | 1082827    | Advanced        | Display<br>More >>           |
| 27 | 42 | <b>36 and 39 and 41</b>                                                                                                                                                                                    | <b>357</b> | <b>Advanced</b> | Display<br>More >>           |

### 3. Cochrane Library

Caesarean section and insurance

## Appendix 10 - PRISMA checklist

|                           |   |                                                                                                                                                                                                                                                                                                             |                                       |
|---------------------------|---|-------------------------------------------------------------------------------------------------------------------------------------------------------------------------------------------------------------------------------------------------------------------------------------------------------------|---------------------------------------|
|                           |   |                                                                                                                                                                                                                                                                                                             |                                       |
| <b>TITLE</b>              |   |                                                                                                                                                                                                                                                                                                             |                                       |
| Title                     | 1 | Identify the report as a systematic review, meta-analysis, or both.                                                                                                                                                                                                                                         | Page 1, 2                             |
| <b>ABSTRACT</b>           |   |                                                                                                                                                                                                                                                                                                             |                                       |
| Structured summary        | 2 | Provide a structured summary including, as applicable: background; objectives; data sources; study eligibility criteria, participants, and interventions; study appraisal and synthesis methods; results; limitations; conclusions and implications of key findings; systematic review registration number. | Page 2,3                              |
| <b>INTRODUCTION</b>       |   |                                                                                                                                                                                                                                                                                                             |                                       |
| Rationale                 | 3 | Describe the rationale for the review in the context of what is already known.                                                                                                                                                                                                                              | Page 4                                |
| Objectives                | 4 | Provide an explicit statement of questions being addressed with reference to participants, interventions, comparisons, outcomes, and study design (PICOS).                                                                                                                                                  | Page 4,5                              |
| <b>METHODS</b>            |   |                                                                                                                                                                                                                                                                                                             |                                       |
| Protocol and registration | 5 | Indicate if a review protocol exists, if and where it can be accessed (e.g., Web address), and, if available, provide registration information including registration number.                                                                                                                               | No published protocol or registration |
| Eligibility criteria      | 6 | Specify study characteristics (e.g., PICOS, length of follow-up) and report characteristics (e.g., years considered, language, publication status) used as criteria for eligibility, giving rationale.                                                                                                      | Page 4,5                              |
| Information sources       | 7 | Describe all information sources (e.g., databases with dates of coverage, contact with study authors to identify additional studies) in the search and date last searched.                                                                                                                                  | Page 4                                |
| Search                    | 8 | Present full electronic search strategy for at least one database, including any limits used, such that it could be repeated.                                                                                                                                                                               | S8 Appendix                           |
| Study selection           | 9 | State the process for selecting studies (i.e., screening, eligibility, included in systematic review, and, if applicable, included in the meta-analysis).                                                                                                                                                   | Page 6, Fig 1                         |

|    |                                    |    |                                                                                                                                                                                                                        |                                                 |
|----|------------------------------------|----|------------------------------------------------------------------------------------------------------------------------------------------------------------------------------------------------------------------------|-------------------------------------------------|
| 1  | Data collection process            | 10 | Describe method of data extraction from reports (e.g., piloted forms, independently, in duplicate) and any processes for obtaining and confirming data from investigators.                                             | Page 5                                          |
| 2  |                                    |    |                                                                                                                                                                                                                        |                                                 |
| 3  |                                    |    |                                                                                                                                                                                                                        |                                                 |
| 4  | Data items                         | 11 | List and define all variables for which data were sought (e.g., PICOS, funding sources) and any assumptions and simplifications made.                                                                                  | Page 4, 5                                       |
| 5  |                                    |    |                                                                                                                                                                                                                        |                                                 |
| 6  |                                    |    |                                                                                                                                                                                                                        |                                                 |
| 7  | Risk of bias in individual studies | 12 | Describe methods used for assessing risk of bias of individual studies (including specification of whether this was done at the study or outcome level), and how this information is to be used in any data synthesis. | Appendix 1, 2, 3                                |
| 8  |                                    |    |                                                                                                                                                                                                                        |                                                 |
| 9  |                                    |    |                                                                                                                                                                                                                        |                                                 |
| 10 | Summary measures                   | 13 | State the principal summary measures (e.g., risk ratio, difference in means).                                                                                                                                          | Page 4, 5                                       |
| 11 |                                    |    |                                                                                                                                                                                                                        |                                                 |
| 12 | Synthesis of results               | 14 | Describe the methods of handling data and combining results of studies, if done, including measures of consistency (e.g., $I^2$ ) for each meta-analysis.                                                              | Page 5                                          |
| 13 |                                    |    |                                                                                                                                                                                                                        |                                                 |
| 14 | Risk of bias across studies        | 15 | Specify any assessment of risk of bias that may affect the cumulative evidence (e.g., publication bias, selective reporting within studies).                                                                           | Appendix 1, 2, 3                                |
| 15 |                                    |    |                                                                                                                                                                                                                        |                                                 |
| 16 |                                    |    |                                                                                                                                                                                                                        |                                                 |
| 17 | Additional analyses                | 16 | Describe methods of additional analyses (e.g., sensitivity or subgroup analyses, meta-regression), if done, indicating which were pre-specified.                                                                       | Page 5                                          |
| 18 |                                    |    |                                                                                                                                                                                                                        |                                                 |
| 19 |                                    |    |                                                                                                                                                                                                                        |                                                 |
| 20 |                                    |    |                                                                                                                                                                                                                        |                                                 |
| 21 | <b>RESULTS</b>                     |    |                                                                                                                                                                                                                        |                                                 |
| 22 |                                    |    |                                                                                                                                                                                                                        |                                                 |
| 23 | Study selection                    | 17 | Give numbers of studies screened, assessed for eligibility, and included in the review, with reasons for exclusions at each stage, ideally with a flow diagram.                                                        | Page 5, 6, Fig 1                                |
| 24 |                                    |    |                                                                                                                                                                                                                        |                                                 |
| 25 |                                    |    |                                                                                                                                                                                                                        |                                                 |
| 26 | Study characteristics              | 18 | For each study, present characteristics for which data were extracted (e.g., study size, PICOS, follow-up period) and provide the citations.                                                                           | Table 1, Appendix 1, 2, 3                       |
| 27 |                                    |    |                                                                                                                                                                                                                        |                                                 |
| 28 |                                    |    |                                                                                                                                                                                                                        |                                                 |
| 29 |                                    |    |                                                                                                                                                                                                                        |                                                 |
| 30 | Risk of bias within studies        | 19 | Present data on risk of bias of each study and, if available, any outcome level assessment (see item 12).                                                                                                              | Appendix 1, 2, 3                                |
| 31 |                                    |    |                                                                                                                                                                                                                        |                                                 |
| 32 |                                    |    |                                                                                                                                                                                                                        |                                                 |
| 33 | Results of individual studies      | 20 | For all outcomes considered (benefits or harms), present, for each study: (a) simple summary data for each intervention group (b) effect estimates and confidence intervals, ideally with a forest plot.               | Fig 1, Appendix 5                               |
| 34 |                                    |    |                                                                                                                                                                                                                        |                                                 |
| 35 |                                    |    |                                                                                                                                                                                                                        |                                                 |
| 36 | Synthesis of results               | 21 | Present results of each meta-analysis done, including confidence intervals and measures of consistency.                                                                                                                | Page 6, 7, Fig 1, Fig 3, Appendix 5, Appendix 7 |
| 37 |                                    |    |                                                                                                                                                                                                                        |                                                 |
| 38 |                                    |    |                                                                                                                                                                                                                        |                                                 |
| 39 |                                    |    |                                                                                                                                                                                                                        |                                                 |
| 40 |                                    |    |                                                                                                                                                                                                                        |                                                 |
| 41 |                                    |    |                                                                                                                                                                                                                        |                                                 |
| 42 |                                    |    |                                                                                                                                                                                                                        |                                                 |
| 43 |                                    |    |                                                                                                                                                                                                                        |                                                 |
| 44 |                                    |    |                                                                                                                                                                                                                        |                                                 |
| 45 |                                    |    |                                                                                                                                                                                                                        |                                                 |
| 46 |                                    |    |                                                                                                                                                                                                                        |                                                 |
| 47 |                                    |    |                                                                                                                                                                                                                        |                                                 |

|                             |    |                                                                                                                                                                                      |                                      |
|-----------------------------|----|--------------------------------------------------------------------------------------------------------------------------------------------------------------------------------------|--------------------------------------|
| Risk of bias across studies | 22 | Present results of any assessment of risk of bias across studies (see Item 15).                                                                                                      | Appendix 1, 2, 3                     |
| Additional analysis         | 23 | Give results of additional analyses, if done (e.g., sensitivity or subgroup analyses, meta-regression [see Item 16]).                                                                | Page 6, 7, Fig 2, Fig 5, Appendix 6, |
| <b>DISCUSSION</b>           |    |                                                                                                                                                                                      |                                      |
| Summary of evidence         | 24 | Summarize the main findings including the strength of evidence for each main outcome; consider their relevance to key groups (e.g., healthcare providers, users, and policy makers). | Page 7                               |
| Limitations                 | 25 | Discuss limitations at study and outcome level (e.g., risk of bias), and at review-level (e.g., incomplete retrieval of identified research, reporting bias).                        | Page 8                               |
| Conclusions                 | 26 | Provide a general interpretation of the results in the context of other evidence, and implications for future research.                                                              | Page 8, 9                            |
| <b>FUNDING</b>              |    |                                                                                                                                                                                      |                                      |
| Funding                     | 27 | Describe sources of funding for the systematic review and other support (e.g., supply of data); role of funders for the systematic review.                                           | In submitting system                 |

**Research Checklist**

1  
2 According to MOOSE statement for meta-analyses of observational studies  
3  
4  
5

**Reporting of background should include****Where to find in manuscript**

6  
7  
8 Problem definition

Manuscript (page 5)

9  
10 Hypothesis statement

Manuscript (page 5)

11  
12 Description of study outcome(s)

Manuscript (page 6)

13  
14 Type of exposure or intervention used

Manuscript (page 6)

15  
16 Type of study designs used

Manuscript (page 6)

17  
18 Study population

Manuscript (page 6)

**Reporting of search strategy should include**

19  
20 Qualifications of searchers (eg, librarians and investigators)

Manuscript (page 6)

21  
22 Search strategy, including time period included in the synthesis and

Manuscript (pages 5), Appendix 9

23  
24 keywords

25  
26 Effort to include all available studies, including contact with authors

Manuscript (page 5-6)

27  
28 Databases and registries searched

Manuscript (page 6)

29  
30 Search software used, name and version, including special features

Manuscript (page 6)

31  
32 used (eg, explosion)

33  
34 Use of hand searching (eg, reference lists of obtained articles)

Manuscript (page 6)

35  
36 List of citations located and those excluded, including justification

Appendix 1

37  
38 Method of addressing articles published in languages other than

n/a

39  
40 English

41  
42 Method of handling abstracts and unpublished studies

Manuscript (page 6)

43  
44 Description of any contact with authors

No contact made

**Reporting of methods should include**

45  
46 Description of relevance or appropriateness of studies assembled for

Manuscript (page 6)

47  
48 assessing the hypothesis to be tested

|                                                                                                                                                                                                                   |                                                                                                                                                                                                                                                                              |                                                       |
|-------------------------------------------------------------------------------------------------------------------------------------------------------------------------------------------------------------------|------------------------------------------------------------------------------------------------------------------------------------------------------------------------------------------------------------------------------------------------------------------------------|-------------------------------------------------------|
| 1<br>2<br>3<br>4<br>5<br>6<br>7<br>8<br>9<br>10<br>11<br>12<br>13<br>14<br>15<br>16<br>17<br>18<br>19<br>20<br>21<br>22<br>23<br>24<br>25<br>26<br>27<br>28<br>29<br>30<br>31<br>32<br>33<br>34<br>35<br>36<br>37 | Rationale for the selection and coding of data (eg, sound clinical principles or convenience)                                                                                                                                                                                | Manuscript (page 6)                                   |
| 38                                                                                                                                                                                                                | Documentation of how data were classified and coded (eg, multiple raters, blinding, and interrater reliability)                                                                                                                                                              | Manuscript (pages 6)                                  |
| 39                                                                                                                                                                                                                | Assessment of confounding (eg, comparability of cases and controls in studies where appropriate)                                                                                                                                                                             | Manuscript (page 6-7)<br>Appendix 3                   |
| 40                                                                                                                                                                                                                | Assessment of study quality, including blinding of quality assessors; stratification or regression on possible predictors of study results                                                                                                                                   | n/a                                                   |
| 41                                                                                                                                                                                                                | Assessment of heterogeneity                                                                                                                                                                                                                                                  | Manuscript (page 6-7)                                 |
| 42                                                                                                                                                                                                                | Description of statistical methods (eg, complete description of fixed or random effects models, justification of whether the chosen models account for predictors of study results, dose-response models, or cumulative meta-analysis) in sufficient detail to be replicated | Manuscript (page 6-7)                                 |
| 43                                                                                                                                                                                                                | Provision of appropriate tables and graphics                                                                                                                                                                                                                                 | Manuscript, Table 1, Figure 1-3 and<br>Appendixes 1-8 |
| 44                                                                                                                                                                                                                | <b>Reporting of results should include</b>                                                                                                                                                                                                                                   |                                                       |
| 45                                                                                                                                                                                                                | Graphic summarizing individual study estimates and overall estimate                                                                                                                                                                                                          | Figure 2-4                                            |
| 46                                                                                                                                                                                                                | Table giving descriptive information for each study included                                                                                                                                                                                                                 | Table 1                                               |
| 47                                                                                                                                                                                                                | Results of sensitivity testing (eg, subgroup analysis)                                                                                                                                                                                                                       | Figure 2, Appendixes 5-8                              |
| 48                                                                                                                                                                                                                | Indication of statistical uncertainty of findings                                                                                                                                                                                                                            | Manuscript, Figure 2-4                                |
| 49                                                                                                                                                                                                                | <b>Reporting of discussion should include</b>                                                                                                                                                                                                                                |                                                       |
| 50                                                                                                                                                                                                                | Quantitative assessment of bias (eg, publication bias)                                                                                                                                                                                                                       | Manuscript (page 8-9)                                 |
| 51                                                                                                                                                                                                                | Justification for exclusion (eg, exclusion of non—English-language citations)                                                                                                                                                                                                | n/a                                                   |
| 52                                                                                                                                                                                                                | Assessment of quality of included studies                                                                                                                                                                                                                                    | n/a                                                   |

**Reporting of conclusions should include**

|    |                                                                 |                          |
|----|-----------------------------------------------------------------|--------------------------|
| 1  |                                                                 |                          |
| 2  | Consideration of alternative explanations for observed results  | Manuscript (pages 10-12) |
| 3  |                                                                 |                          |
| 4  | Generalization of the conclusions (ie, appropriate for the data | Manuscript (page 12-13)  |
| 5  |                                                                 |                          |
| 6  | presented and within the domain of the literature review)       |                          |
| 7  |                                                                 |                          |
| 8  |                                                                 |                          |
| 9  | Guidelines for future research                                  | Manuscript (page 12)     |
| 10 |                                                                 |                          |
| 11 | Disclosure of funding source                                    | Manuscript (page 14)     |
| 12 |                                                                 |                          |
| 13 |                                                                 |                          |
| 14 |                                                                 |                          |
| 15 |                                                                 |                          |
| 16 |                                                                 |                          |
| 17 |                                                                 |                          |
| 18 |                                                                 |                          |
| 19 |                                                                 |                          |
| 20 |                                                                 |                          |
| 21 |                                                                 |                          |
| 22 |                                                                 |                          |
| 23 |                                                                 |                          |
| 24 |                                                                 |                          |
| 25 |                                                                 |                          |
| 26 |                                                                 |                          |
| 27 |                                                                 |                          |
| 28 |                                                                 |                          |
| 29 |                                                                 |                          |
| 30 |                                                                 |                          |
| 31 |                                                                 |                          |
| 32 |                                                                 |                          |
| 33 |                                                                 |                          |
| 34 |                                                                 |                          |
| 35 |                                                                 |                          |
| 36 |                                                                 |                          |
| 37 |                                                                 |                          |
| 38 |                                                                 |                          |
| 39 |                                                                 |                          |
| 40 |                                                                 |                          |
| 41 |                                                                 |                          |
| 42 |                                                                 |                          |
| 43 |                                                                 |                          |
| 44 |                                                                 |                          |
| 45 |                                                                 |                          |
| 46 |                                                                 |                          |
| 47 |                                                                 |                          |
| 48 |                                                                 |                          |
| 49 |                                                                 |                          |
| 50 |                                                                 |                          |
| 51 |                                                                 |                          |
| 52 |                                                                 |                          |
| 53 |                                                                 |                          |
| 54 |                                                                 |                          |
| 55 |                                                                 |                          |
| 56 |                                                                 |                          |
| 57 |                                                                 |                          |
| 58 |                                                                 |                          |
| 59 |                                                                 |                          |
| 60 |                                                                 |                          |

For peer review only

# BMJ Open

## Caesarean Sections and Private Insurance: Systematic Review and Meta-analysis

|                                 |                                                                                                                                                                                                                                                                                                                                                                                                                                                                                                                                                                                                                  |
|---------------------------------|------------------------------------------------------------------------------------------------------------------------------------------------------------------------------------------------------------------------------------------------------------------------------------------------------------------------------------------------------------------------------------------------------------------------------------------------------------------------------------------------------------------------------------------------------------------------------------------------------------------|
| Journal:                        | <i>BMJ Open</i>                                                                                                                                                                                                                                                                                                                                                                                                                                                                                                                                                                                                  |
| Manuscript ID                   | bmjopen-2017-016600.R2                                                                                                                                                                                                                                                                                                                                                                                                                                                                                                                                                                                           |
| Article Type:                   | Research                                                                                                                                                                                                                                                                                                                                                                                                                                                                                                                                                                                                         |
| Date Submitted by the Author:   | 07-Jul-2017                                                                                                                                                                                                                                                                                                                                                                                                                                                                                                                                                                                                      |
| Complete List of Authors:       | Hoxha, Ilir; Universitat Bern Institut fur Sozial- und Praventivmedizin, Health Services Research<br>Syrogiannouli, Lamprini; Universitat Bern, Berner Institut für Hausarztmedizin (BIHAM)<br>Braha, Medina; International Business College Mitrovica, Department of Managment and Marketing<br>Goodman, David C; Dartmouth College Geisel School of Medicine<br>da Costa, Bruno; Universitat Bern, Berner Institut für Hausarztmedizin (BIHAM)<br>Jüni, Peter; Applied Health Research Centre (AHRC), Li Ka Shing Knowledge Institute of St. Michael's Hospital, Department of Medicine, University of Toronto |
| <b>Primary Subject Heading</b>: | Health services research                                                                                                                                                                                                                                                                                                                                                                                                                                                                                                                                                                                         |
| Secondary Subject Heading:      | Health economics, Health policy, Health services research, Obstetrics and gynaecology                                                                                                                                                                                                                                                                                                                                                                                                                                                                                                                            |
| Keywords:                       | caesarean section, health insurance, private insurance, financial incentives, medical practice variation, health services                                                                                                                                                                                                                                                                                                                                                                                                                                                                                        |
|                                 |                                                                                                                                                                                                                                                                                                                                                                                                                                                                                                                                                                                                                  |

SCHOLARONE™  
Manuscripts



## Caesarean Sections and Private Insurance: Systematic Review and Meta-analysis

*Ilir Hoxha PhD,<sup>a,b</sup> Lamprini Syrogiannouli Research Associate,<sup>b</sup> Medina Braha Lecturer, David C. Goodman Professor of Paediatrics,<sup>ad</sup> Bruno R. da Costa Head of Statistics & Methodology,<sup>b</sup> Peter Jüni Professor of Medicine and Director<sup>e</sup>*

<sup>a</sup> Institute of Social and Preventive Medicine, University of Bern, 3012 Bern, Switzerland

<sup>b</sup> Institute of Primary Health Care, University of Bern, 3012 Bern, Switzerland

<sup>c</sup> International Business College Mitrovica, 40000 Mitrovica, Kosovo

<sup>d</sup> The Dartmouth Institute for Health Policy and Clinical Practice, 03766 Lebanon, NH, United States

<sup>e</sup> Applied Health Research Centre (AHRC), Li Ka Shing Knowledge Institute of St. Michael's Hospital, Department of Medicine, University of Toronto, M5B 1M8 Toronto, ON, Canada

*Correspondence to: Ilir Hoxha, Finkenhubelweg 11, 3012 Bern, Switzerland; [ilir.hoxha@ispm.unibe.ch](mailto:ilir.hoxha@ispm.unibe.ch); +377 45 588 683*

### Key words

caesarean section, health insurance, private insurance, financial incentives, medical practice variation, health services

### Word count

2939 words excluding title page, abstract, references, figures and tables.

## Abstract

**Objective** - Financial incentives associated with private insurance may encourage health care providers to perform more caesarean sections. We therefore sought to determine the association of private insurance and odds of caesarean section.

**Design** - Systematic review and meta-analysis.

**Data sources** - MEDLINE, Embase, and The Cochrane Library from the first year of records through August 2016.

**Eligibility criteria** – We included studies that reported data to allow the calculation of odds ratios of caesarean section of privately insured as compared to publicly insured women.

**Outcomes** - The pre-specified primary outcome was the adjusted odds ratio of births delivered by caesarean section of women covered with private insurance as compared with women covered with public insurance. The pre-specified secondary outcome was the crude odds ratio of births delivered by caesarean section of women covered with private insurance as compared with women covered with public insurance.

**Results** - Eighteen articles describing 21 separate studies in 12.9 million women were included in this study. In a meta-analysis of 13 studies, the adjusted odds of delivery by caesarean section was 1.13 higher among privately insured women as compared with women with public insurance coverage (95% CI 1.07 to 1.18) with no relevant heterogeneity between studies ( $\tau^2=0.006$ ). The meta-analysis of crude estimates from 12 studies revealed a somewhat more pronounced association (pooled odds ratio 1.35, 95% CI 1.27 to 1.44) with no relevant heterogeneity between studies ( $\tau^2=0.011$ ).

**Conclusions** - Caesarean sections are more likely to be performed in privately insured women as compared with women using public health insurance coverage. Although this

1  
2  
3  
4  
5  
6  
7  
8  
9  
10  
11  
12  
13  
14  
15  
16  
17  
18  
19  
20  
21  
22  
23  
24  
25  
26  
27  
28  
29  
30  
31  
32  
33  
34  
35  
36  
37  
38  
39  
40  
41  
42  
43  
44  
45  
46  
47  
48  
49  
50  
51  
52  
53  
54  
55  
56  
57  
58  
59  
60

effect is small on average and variable in its magnitude, it is present in all analyses we performed.

For peer review only

## Strengths and limitations of this study

- ✓ Our meta-analysis includes a broad literature search, screening and data extraction performed in duplicate, an exploration of study characteristics as a potential source of variation between studies and firm quality assessment and represents major strength of our study.
- ✓ Sensitivity analyses was performed involving studies that required exclusion in main analysis due to overlapping populations.
- ✓ The differences in the characteristics of the study populations, type of data used, types of CS analysed and variables used for adjustment in statistical analyses across studies represent a major limitation of our study.
- ✓ Unadjusted estimates of associations were larger, which suggests the presence of confounding, and we cannot completely rule out residual confounding in adjusted estimates.

## Introduction

The global raise of caesarean section (CS) rates during the past decades has raised concerns over appropriateness of usage of the procedure (1, 2). The increase and immense variation among countries' regions and hospitals has been persistent over the years (3-14). Brazil has the highest rate of CS followed by China, Turkey, and Mexico (15). United States and other developed countries are not far behind. Even countries which traditionally have had low CS rates, like Norway or Sweden have seen substantial increase in CS rates (15). This increase has been accompanied with considerable variation within countries (15). In the United States, there was a fourfold difference in CS rates in low and high use areas (15). In England, the rates have varied threefold among National Health Service trusts (15). In British Columbia, Canada, the CS rates varied from 14.7 % to 27.6 % across health service delivery areas (15). The understanding of escalation of CS rates is important as it may prevent negative outcomes on health of mothers and newborns as well as reduce unnecessary costs related to delivery.

Such increase and variation cannot be explained by clinical factors alone (15). Evidence points to many additional, health system related factors, in particular supplier related factors (15). Financial incentives associated with private insurance seem to influence supplier behaviour, be that physician or hospital, affecting this way clinical decision as to whether perform CS or not (14-22). We therefore performed a systematic review and meta-analysis to determine the association of insurance status of women with the odds of delivery by CS.

## Materials and methods

### *Search strategy and data sources*

We combined search terms indicating CS, such as 'caesarean section', 'caesarean delivery', 'caesarean', with search terms associated with the study design such as 'small area analysis,' 'medical practice variation,' and search terms associated with determinants of variation and

1  
2  
3 increase of CS rates. We did not restrict search by type of language or publication date. We  
4  
5 searched MEDLINE, Embase, and The Cochrane Library from inception to August 4, 2016,  
6  
7 when the search was last updated. In addition, we manually searched the reference lists of all  
8  
9 included studies and earlier systematic reviews that we identified.  
10  
11

### 12 ***Study selection and outcomes***

13  
14 To be eligible for inclusion, studies had to report data to allow the calculation of odds ratios  
15  
16 (OR) of CS comparing women covered by private insurance with women covered by public  
17  
18 insurance in a specific health care system. The pre-specified primary outcome was the  
19  
20 adjusted OR of births delivered by CS of women covered with private insurance as compared  
21  
22 with women with public insurance coverage. The pre-specified secondary outcome was the  
23  
24 crude OR of CS of women covered with private insurance as compared with women with  
25  
26 public insurance.  
27  
28  
29

### 30 ***Data extraction***

31  
32 Two researchers (IH and MB) screened the papers and extracted data independently. Data  
33  
34 from full text articles were extracted onto a data extraction sheet designed to capture data on  
35  
36 study population, study design, data sources, setting, type of CS analysed, and statistical  
37  
38 analysis. We extracted adjusted and/or unadjusted ORs of CS of women with private  
39  
40 insurance as compared with CS of women with public insurance. Differences among  
41  
42 researchers with regards to study inclusion and data extraction procedure were resolved by  
43  
44 consensus and consultation with other authors.  
45  
46  
47  
48

### 49 ***Quality assessment***

50  
51 Quality assessment was performed using the Quality In Prognostic Studies (QUIPS) tool  
52  
53 (23). The QUIPS is used to assess bias in prognostic studies across six domains including:  
54  
55 selection bias; attrition bias, measurement bias of prognostic factor and outcome,  
56  
57  
58  
59  
60

1  
2  
3 confounding; and bias related to the statistical analysis and presentation of results (23). We  
4  
5 decided to use QUIPS tool as it seemed the most appropriate to perform quality assessment of  
6  
7 the studies under investigation. Only minor adjustment of the original tool was performed,  
8  
9 i.e. we added the option “not applicable” in rating of issues assessed for judging domains of  
10  
11 bias. Each study was read in full and evaluated independently by two researchers (IH and  
12  
13 MB). We used three levels of rating, i.e. “high”, “moderate”, or “low” to assess the risk of  
14  
15 bias for all domains (23). Any assessment differences were discussed and a single rating was  
16  
17 assigned to each study. A study was judged with a high or a moderate risk of bias in case only  
18  
19 one of the domains was assessed with a high or a moderate risk of bias. A study was judged  
20  
21 with a low risk of bias in case all the six domains were rated with a low risk of bias.  
22  
23  
24  
25

### 26 *Main analysis*

27  
28 We used standard inverse-variance random effects meta-analysis to estimate the pooled OR.  
29  
30 An OR above one indicates that CS are more frequently performed in women with private  
31  
32 insurance than in women with public insurance. We calculated the variance estimate  $\tau^2$  as a  
33  
34 measure of heterogeneity between studies (24). We pre-specified a  $\tau^2$  of 0.04 to represent low  
35  
36 heterogeneity, 0.16 to represent moderate, and 0.36 to represent high heterogeneity between  
37  
38 studies (25). We conducted analyses stratified by study design, period of data collection,  
39  
40 country, type of CS analysed, parity, inclusion of women with previous CS, pregnancy risk of  
41  
42 included women and QUIPS risk of bias to investigate potential reasons for between-study  
43  
44 heterogeneity and used chi-square tests to calculate p-values for interaction, or tests for linear  
45  
46 trends in cases of more than two ordered strata. All p-values are two-sided.  
47  
48  
49  
50

### 51 *Sensitivity analyses*

52  
53 Five studies (26-30) were excluded from the main analysis, as they had an overlapping  
54  
55 population with a larger study (31) that was included. For this reason, we repeated all  
56  
57  
58  
59  
60

1  
2  
3 analyses including these five studies (26-30) while excluding the larger one (31). Finally, we  
4  
5 visually inspected a funnel plot of adjusted ORs against their standard errors to address  
6  
7 potential small study effects (32). We used STATA, release 13, for all analyses (Stata-Corp,  
8  
9 College Station, Texas).

### 10 11 12 ***Patient involvement***

13  
14 No patients were involved in this study. We used data from published papers only.  
15  
16  
17

### 18 19 **Results**

20  
21 We identified a total of 1490 records with our search strategy (Figure 1): 935 from Medline:  
22  
23 494 from Embase; 38 from the Cochrane Library and 23 from manual search. After removing  
24  
25 duplicates, we screened 1264 records for eligibility, and retained 166 for full text  
26  
27 examination. We excluded another 124 that did not report insurance status of women, 23 that  
28  
29 were otherwise irrelevant and one study that had an overlapping population. Finally, 18  
30  
31 articles describing 21 separate studies in 12.9 million women were included in review and  
32  
33 meta-analysis.  
34  
35

36  
37 Characteristics of studies are presented in Table 1 and Appendixes 1,2 and 3. Sixteen studies  
38  
39 were cross-sectional, five were retrospective cohort studies. Only one study used surveys, 18  
40  
41 hospital records, seven birth registries, and one census data. All studies were published in  
42  
43 English. Most studies were from the United States. Nineteen studies included the entire  
44  
45 population of eligible cases, while only two studies selected cases randomly. Case exclusion  
46  
47 criteria varied considerably: one study excluded women aged 14 and younger; three excluded  
48  
49 multiparas; eight excluded women with previous CS; eight excluded stillbirths and nine  
50  
51 multiple births; six excluded cases with specific presentations of the foetus; six studies  
52  
53 excluded preterm births, and 13 studies excluded cases due to provider characteristics. Two  
54  
55 studies reported ORs of CS for which indication was established before labour (including CS  
56  
57  
58  
59  
60



1  
2  
3 on maternal request) only, three reported CS for which indication was established during  
4 labour and 16 reported ORs of any CS irrespective of indication. Seventeen studies adjusted  
5 for different characteristics as presented in Appendix 3. Quality assessment is presented in  
6 Appendix 4 and 5. No studies were excluded due to quality assessment result. Five studies  
7 were rated with high risk of bias, ten studies with moderate risk of bias and six studies with  
8 low risk of bias.

9  
10  
11  
12  
13  
14  
15  
16  
17 Figure 2 presents the meta-analysis of the 13 studies that reported adjusted ORs (31, 33-42),  
18 all of them using public insurance as the reference group. Overall, the odds of receiving CS  
19 were 1.13 higher for women with private insurance coverage as compared women with public  
20 health insurance coverage (95% CI 1.07 to 1.18), with no relevant heterogeneity between  
21 studies ( $\tau^2=0.006$ ). Figure 3 presents results of stratified analyses of adjusted odds ratios.  
22 Estimates varied between strata, in particular for country (P for interaction<0.001), type of  
23 caesarean section (P for interaction=0.001), inclusion of women with previous CS (P for  
24 interaction=0.001) and pregnancy risk (P for interaction<0.001). Appendix 6 shows a funnel  
25 plot of adjusted ORs against their standard errors on a log scale; there was no evidence for  
26 small study effects. Figure 4 presents the meta-analysis of crude ORs with a slightly stronger  
27 average association (pooled OR 1.35, 95% CI 1.27 to 1.44) and no relevant heterogeneity  
28 between studies ( $\tau^2=0.011$ ). Appendix 7 presents adjusted associations for different states in  
29 the United States. Adjusted estimates ranged from 0.96 in Maryland to 1.54 in New Jersey.

30  
31  
32  
33  
34  
35  
36  
37  
38  
39  
40  
41  
42  
43  
44  
45  
46  
47 Appendixes 8 to 10 report results from sensitivity analyses after inclusion of five smaller  
48 studies (26-30) and exclusion of a larger study (31) that had overlapping populations with the  
49 five smaller ones. Appendix 8 shows the meta-analysis of the 16 studies (26-29, 33-42) with  
50 a pooled adjusted OR of 1.14 (95% CI 1.07 to 1.22) and no evidence for relevant  
51 heterogeneity between studies ( $\tau^2=0.015$ ). Appendix 9 presents results of stratified analyses,  
52  
53  
54  
55  
56  
57  
58  
59  
60

1  
2  
3 with estimates varying between countries (P for interaction<0.001), type of caesarean section  
4  
5 (P for interaction=0.007) and pregnancy risks (P for interaction<0.001). Finally, Appendix 10  
6  
7 presents the meta-analysis of crude ORs, again with a stronger association on average (pooled  
8  
9 OR 1.33, 95% CI 1.25 to 1.41) and no relevant heterogeneity between studies ( $\tau^2=0.014$ ).  
10  
11

## 12 13 **Discussion**

14  
15 Our systematic review and meta-analysis estimated that the overall odds of receiving a  
16  
17 caesarean section are on average 1.13 times higher for privately insured women compared  
18  
19 with women covered with public insurance. The increased risk was observed across all  
20  
21 subgroups of studies in stratified analyses as well as in sensitivity analysis.  
22  
23  
24

### 25 26 **Context**

27  
28 To our knowledge, this is the first meta-analysis to examine the association of CS rates with  
29  
30 types of insurance. A recently published meta-analysis found that the odds of delivery by CS  
31  
32 was 1.41 higher in for-profit hospitals as compared with non-profit hospitals (95% CI 1.24 to  
33  
34 1.60) (22). These findings were confirmed across subgroups (i.e. such as country, year, or  
35  
36 study design) of studies in stratified analyses, indicating financial incentives may play an  
37  
38 important role in such outcome (22). We found three other recent meta-analyses that  
39  
40 summarized CS studies and found a strong association with obesity (43), Sub-Saharan Africa  
41  
42 ethnic origin (44) and labour induction (45). Our estimates of a 14 percent increase are on the  
43  
44 lower end of the strength of associations found in earlier studies.  
45  
46  
47  
48

### 49 50 **Strengths and limitations**

51  
52 The major strengths of our meta-analysis include a broad literature search (Appendix 11),  
53  
54 screening and data extraction performed in duplicate, an exploration of study characteristics  
55  
56 as a potential source of variation between studies, sensitivity analyses involving studies that  
57  
58  
59  
60

1  
2  
3 required exclusion due to overlapping populations and firm quality assessment using QUIPS  
4  
5 tool. Major limitations are differences in the characteristics of the study populations, type of  
6  
7 data used, types of CS analysed and variables used for adjustment in statistical analyses  
8  
9 across studies. Unadjusted estimates of associations were larger, which suggests the presence  
10  
11 of confounding, and we cannot completely rule out residual confounding in adjusted  
12  
13 estimates.  
14  
15

### 16 17 *Mechanisms*

18  
19 Existing evidence suggests that possible causes for higher odds of CS in women insured privately lie  
20  
21 in the differences in payment for CS and reimbursement arrangements among insurers as well as  
22  
23 providers' responses to these arrangements. In the countries included in our analysis, private health  
24  
25 insurers generally reimburse hospitals at higher fees for providing a CS compared to the public  
26  
27 insurers (36). This incentive is heightened when public insurance funds hospital care through  
28  
29 a budget (e.g. Australia and Ireland) rather than fee-for-service, which is common in private  
30  
31 insurance (46, 47). Similar incentives are present in physician payment.  
32  
33

34  
35 Multiple studies have shown that hospitals are motivated by and responsive to financial  
36  
37 incentives (22, 34, 48, 49), although Grant (36) argues that their impact is small. One  
38  
39 example is the financial benefit associated with longer hospital stays associated with CS (48,  
40  
41 50). Hospitals may incentivize physicians (48, 49) to align their clinical decision with  
42  
43 institutional strategies, such as patient scheduling policies that steer patients with private  
44  
45 insurance to more profit prone physicians (48, 49). Physicians are known to be motivated by  
46  
47 higher fees paid for CS as compared with vaginal delivery (48). They often act as self-  
48  
49 interested economic agents according to economic models of physician behaviour, by  
50  
51 maximizing income and convenience (34). Physicians are also in a position to exploit  
52  
53 asymmetry of information between them and patients (51, 52), which leads to  
54  
55 recommendations that are not always aligned with patient needs or preferences (15). There is  
56  
57  
58  
59  
60

1  
2  
3 also evidence that physicians with higher numbers of privately insured patients will tend to  
4  
5 perform more CS (34, 36); explanations include perceptions that patients with private  
6  
7 insurance have a higher social class, or more prevalent concerns about malpractice liability in  
8  
9 patients with private insurance (53).  
10

11  
12 Comparing 'public insurance' and 'private insurance' across countries is not a  
13  
14 straightforward exercise as the meaning of such distinction can vary substantially across  
15  
16 countries. In the United States 'public insurance' is insurance assigned to specific categories  
17  
18 of population (by age, disability, poverty or military service) and 'private insurance' is  
19  
20 insurance mainly organized through employment. In general, private insurance offers higher  
21  
22 reimbursement rates for surgical procedures, and this may incentivize CS. The heterogeneity  
23  
24 of adjusted estimates across states in the United States (Appendix 7) points to setting specific  
25  
26 factors that will influence the effect of insurance on the odds of CS and are worth of further  
27  
28 investigation. According to Burns et al., the lacking association in Arizona (OR=1.02) may  
29  
30 be due to equal magnitudes of re-imbursments of hospitals for vaginal birth and CS (34). In  
31  
32 Maryland (OR=0.96), the state administration introduced HealthChoice Program in 1997, that  
33  
34 was intended to provide prevention oriented healthcare services, enact better accountability  
35  
36 measures for managed care organizations, and ensure efficient use of financial resources (38).  
37  
38 This program introduced a mandatory managed care system for Medicaid beneficiaries,  
39  
40 which replaced a fee-for-service model. This resulted in more patients receiving managed  
41  
42 care irrespective of their insurance status and, in turn, use of similar policies in patients with  
43  
44 public and private insurance (38). We are unaware of plausible explanations for the lack of  
45  
46 associations observed in Michigan (OR 1.01) and Ohio (OR 1.00). This analysis shows that  
47  
48 variation in CS rates among insurers within the United States can be explained by differences  
49  
50 in reimbursement arrangements nested within public and private insurance.  
51  
52  
53  
54  
55  
56  
57  
58  
59  
60

1  
2  
3 For the other two countries, Ireland and Australia, included in the adjusted analysis, 'private health  
4 insurance' status differs in character from the United States but offers similarly higher payment levels  
5 for procedures. In Australia, women of childbearing age with private insurance, would have increased  
6 the use of private obstetricians, leading to higher rates of CS (54). In Ireland, the financial  
7 incentives in private insurance are similar, and are associated with striking inequities in care  
8 (55).

### 17 **Policy and research implications**

19 Increases in the cost of care and hospital charges have become central issues in policy  
20 discussion in the United States and elsewhere (15, 56). While the public health care costs are  
21 reaching unsustainable levels, hospital charges can have alarming effects on patients (56). In  
22 addition, the potential negative clinical effects of CS on mothers and newborns have raised  
23 concerns among clinicians, academics and policymakers alike (15).

31 Recent studies and their media coverage and associated increase in public awareness of high  
32 CS rates and changes in reimbursement policy have led to recent decreases of CS rates (18).  
33 Our study provides additional evidence to support policy and advocacy efforts that address  
34 escalating CS rates, in particular their association with financial incentives. Effective policy  
35 measures often require context, country or state specific policy analyses investigating  
36 particular insurance schemes. These setting specific analyses are essential as incentives and  
37 reimbursement arrangements within health insurance schemes may differ across health care  
38 systems. We recognize that while categories 'public insurance' and 'private insurance' are useful  
39 markers of higher reimbursement rates, other aspects of insurance reimbursement may also influence  
40 the odds of CS.

54 As we analyse CS rates relation with health insurance schemes we need also to be aware of  
55 complexity of interaction of different determinants and their influence in CS rates. The  
56

1  
2  
3 published literature has identified a number of determinants of CS rates which operate at  
4  
5 different levels of health care systems (macro, meso, and micro) (15). At the macro level of  
6  
7 national health systems, operate factors such as health financing system, social and political  
8  
9 context, legal regulations, general cultural and social norms and similar. At the meso level are  
10  
11 hospitals and health care facilities. Their ownership status, availability of resources and size  
12  
13 are known to influence CS rates (15, 22). Finally, at the micro level, we have clinical units  
14  
15 that provide care, medical staff and patients, which are characterised with all sorts of features  
16  
17 that can influence the decision for CS. For example, clinical unit staff composition, or  
18  
19 physician education, gender and experience, or mother preference, age and race, are all  
20  
21 known to determine the rates of CS (15).  
22  
23  
24  
25

### 26 ***Conclusion***

27  
28 This systematic review and meta-analysis indicates that CS are more likely to be performed  
29  
30 in privately insured women as compared to women with public health insurance coverage.  
31  
32 Although this effect is small and variable across strata, it is present in all performed analysis.  
33  
34 Review of setting-specific payment levels and reimbursement arrangements within health  
35  
36 insurance schemes will enable a better understanding of influencing factors. Efforts to  
37  
38 address payment levels for delivery procedures and reform of reimbursement arrangements  
39  
40 may lead to a reduction of CS rates to more appropriate levels (18, 22, 38, 57).  
41  
42  
43  
44  
45

### 46 **Acknowledgments**

#### 47 ***Exclusive Licence***

48  
49 *The Corresponding Author has the right to grant on behalf of all authors and does grant on*  
50  
51 *behalf of all authors, an exclusive licence (or non-exclusive for government employees) on a*  
52  
53 *worldwide basis to the BMJ Publishing Group Ltd and its Licensees to permit this article (if*  
54  
55 *accepted) to be published in BMJ Open and any other BMJ PGL products to exploit all*  
56  
57  
58  
59  
60

1  
2  
3 subsidiary rights, as set out in our licence [http://journals.bmj.com/site/authors/editorial-](http://journals.bmj.com/site/authors/editorial-policies.xhtml#copyright)  
4 [policies.xhtml#copyright](http://journals.bmj.com/site/authors/editorial-policies.xhtml#copyright) and the Corresponding Author accepts and understands that any  
5 supply made under these terms is made by BMJPGJ to the Corresponding Author. All  
6 articles published in BMJ Open will be made available on an Open Access basis (with  
7 authors being asked to pay an open access fee - see  
8 <http://bmjopen.bmj.com/site/about/resources.xhtml>) Access shall be governed by a Creative  
9 Commons licence – details as to which Creative Commons licence will apply to the article  
10 are set out in our licence referred to above.  
11  
12  
13  
14  
15  
16  
17  
18  
19

### 20 21 22 **Contributorship Statement**

23  
24 *IH, LS, DG, PJ conceived and designed the study. IH, LS, MB performed the data extraction*  
25 *and preparation. IH, LS, Bdc, PJ analysed the data. IH, DG, PJ wrote the paper, which was*  
26 *critically reviewed and approved by all authors.*  
27  
28  
29

30  
31  
32 *We thank Doris Kopp and Beatrice Minder for her valuable help during development and*  
33 *execution of search strategy, Andre Busato and Xhylyjeta Luta for support in study design and*  
34 *data extraction and Dr. Karmit Zysman for editorial contribution.*  
35  
36  
37  
38  
39

### 40 41 **Competing interests statement**

42  
43 *All authors have completed the ICMJE uniform disclosure form at*  
44 [www.icmje.org/coi\\_disclosure.pdf](http://www.icmje.org/coi_disclosure.pdf) and declare: no support from any organisation for the  
45 submitted work; no financial relationships with any organisations that might have an interest  
46 in the submitted work in the previous three years; no other relationships or activities that  
47 could appear to have influenced the submitted work.  
48  
49  
50  
51  
52

### 53 54 55 **Funding statement**

1  
2  
3 *No funding was received to perform this study. All authors, had full access to all of the data*  
4 *(including statistical reports and tables) in the study and take responsibility for the integrity*  
5 *of the data and the accuracy of the data analysis.*  
6  
7  
8  
9

#### 10 ***Data sharing statement***

11  
12 *No additional unpublished data are available from the study.*  
13  
14  
15  
16  
17  
18  
19  
20  
21  
22  
23  
24  
25  
26  
27  
28  
29  
30  
31  
32  
33  
34  
35  
36  
37  
38  
39  
40  
41  
42  
43  
44  
45  
46  
47  
48  
49  
50  
51  
52  
53  
54  
55  
56

#### 57 **References**

58  
59  
60



- 1  
2  
3 1. Molina G, Weiser TG, Lipsitz SR, Esquivel MM, Uribe-Leitz T, Azad T, et al. Relationship  
4 Between Cesarean Delivery Rate and Maternal and Neonatal Mortality. *JAMA*. 2015;314(21):2263-  
5 70.  
6
- 7  
8  
9 2. Vogel JP, Betran AP, Vindevoghel N, Souza JP, Torloni MR, Zhang J, et al. Use of the  
10 Robson classification to assess caesarean section trends in 21 countries: a secondary analysis of two  
11 WHO multicountry surveys. *Lancet Glob Health*. 2015;3(5):e260-70.  
12
- 13 3. McPherson K, Gon G, Scott M. International Variations in a Selected Number of Surgical  
14 Procedures: OECD Publishing; 2013 [Available from: <http://dx.doi.org/10.1787/5k49h4p5g9mw-en>.  
15
- 16  
17 4. Bragg F, Cromwell DA, Edozien LC, Gurol-Urganci I, Mahmood TA, Templeton A, et al.  
18 Variation in rates of caesarean section among English NHS trusts after accounting for maternal and  
19 clinical risk: cross sectional study. *BMJ*. 2010;341:c5065.  
20
- 21  
22 5. Baicker K, Buckles KS, Chandra A. Geographic variation in the appropriate use of cesarean  
23 delivery. *Health Aff (Millwood)*. 2006;25(5):w355-67.  
24
- 25  
26 6. Hanley GE, Janssen PA, Greyson D. Regional variation in the cesarean delivery and assisted  
27 vaginal delivery rates. *Obstet Gynecol*. 2010;115(6):1201-8.  
28
- 29  
30 7. Feng XL, Xu L, Guo Y, Ronsmans C. Factors influencing rising caesarean section rates in  
31 China between 1988 and 2008. *Bull World Health Organ*. 2012;90(1):30-9, 9A.  
32
- 33  
34 8. Stephenson PA, Bakoula C, Hemminki E, Knudsen L, Levasseur M, Schenker J, et al.  
35 Patterns of use of obstetrical interventions in 12 countries. *Paediatr Perinat Epidemiol*. 1993;7(1):45-  
36 54.  
37
- 38  
39 9. Renwick MY. Caesarean section rates, Australia 1986: variations at state and small area level.  
40 *Aust N Z J Obstet Gynaecol*. 1991;31(4):299-304.  
41
- 42  
43 10. Brennan DJ, Robson MS, Murphy M, O'Herlihy C. Comparative analysis of international  
44 cesarean delivery rates using 10-group classification identifies significant variation in spontaneous  
45 labor. *Am J Obstet Gynecol*. 2009;201(3):308 e1-8.  
46
- 47  
48 11. Festin MR, Laopaiboon M, Pattanittum P, Ewens MR, Henderson-Smart DJ, Crowther CA.  
49 Caesarean section in four South East Asian countries: reasons for, rates, associated care practices and  
50 health outcomes. *BMC Pregnancy Childbirth*. 2009;9:17.  
51  
52  
53  
54  
55  
56  
57  
58  
59  
60

12. Johnson N, Ansell D. Variation in caesarean and instrumental delivery rates in New Zealand hospitals. *Aust N Z J Obstet Gynaecol.* 1995;35(1):6-11.
13. Keskimaki I, Aro S, Teperi J. Regional variation in surgical procedure rates in Finland. *Scand J Soc Med.* 1994;22(2):132-8.
14. Knight M, Sullivan EA. Variation in caesarean delivery rates. *BMJ.* 2010;341:c5255.
15. Hoxha I, Busato A, Luta X. Medical Practice Variations in Reproductive, Obstetric, and Gynecological Care. In: Johnson A, Stukel TA, editors. *Medical Practice Variations.* Boston, MA: Springer US; 2016. p. 141-60.
16. Keeler EB, Brodie M. Economic incentives in the choice between vaginal delivery and cesarean section. *Milbank Q.* 1993;71(3):365-404.
17. Mossialos E, Allin S, Karras K, Davaki K. An investigation of Caesarean sections in three Greek hospitals: the impact of financial incentives and convenience. *Eur J Public Health.* 2005;15(3):288-95.
18. Grant D. Physician financial incentives and cesarean delivery: new conclusions from the healthcare cost and utilization project. *J Health Econ.* 2009;28(1):244-50.
19. Gregory KD, Korst LM, Platt LD. Variation in elective primary cesarean delivery by patient and hospital factors. *Am J Obstet Gynecol.* 2001;184(7):1521-32; discussion 32-4.
20. Koroukian SM, Bush D, Rimm AA. Comparison of cesarean section rates in fee-for-service versus managed care patients in the Ohio Medicaid population, 1992-1997. *The American journal of managed care.* 2001;7(2):134-42.
21. Roberts CL, Tracy S, Peat B. Rates for obstetric intervention among private and public patients in Australia: population based descriptive study. *BMJ.* 2000;321(7254):137-41.
22. Hoxha I, Syrogiannouli L, Luta X, Tal K, Goodman DC, da Costa BR, et al. Caesarean sections and for-profit status of hospitals: systematic review and meta-analysis. *BMJ Open.* 2017;7(2):e013670.
23. Hayden JA, van der Windt DA, Cartwright JL, Cote P, Bombardier C. Assessing bias in studies of prognostic factors. *Ann Intern Med.* 2013;158(4):280-6.

- 1  
2  
3 24. DerSimonian R, Laird N. Meta-analysis in clinical trials. *Controlled clinical trials*.  
4  
5 1986;7(3):177-88.  
6  
7 25. da Costa BR, Juni P. Systematic reviews and meta-analyses of randomized trials: principles  
8  
9 and pitfalls. *Eur Heart J*. 2014;35(47):3336-45.  
10  
11 26. Coonrod DV, Drachman D, Hobson P, Manriquez M. Nulliparous term singleton vertex  
12  
13 cesarean delivery rates: institutional and individual level predictors. *Am J Obstet Gynecol*.  
14  
15 2008;198(6):694 e1-11; discussion e11.  
16  
17 27. Huesch MD. Association between type of health insurance and elective cesarean deliveries:  
18  
19 New Jersey, 2004-2007. *Am J Public Health*. 2011;101(11):e1-7.  
20  
21 28. Movsas TZ, Wells E, Mongoven A, Grigorescu V. Does medical insurance type (private vs  
22  
23 public) influence the physician's decision to perform Caesarean delivery? *J Med Ethics*.  
24  
25 2012;38(8):470-3.  
26  
27 29. Henke RM, Wier LM, Marder WD, Friedman BS, Wong HS. Geographic variation in  
28  
29 cesarean delivery in the United States by payer. *BMC Pregnancy Childbirth*. 2014;14:387.  
30  
31 30. Sebastiao YV, Womack L, Vamos CA, Louis JM, Olaoye F, Caragan T, et al. Hospital  
32  
33 variation in cesarean delivery rates: contribution of individual and hospital factors in Florida. *Am J*  
34  
35 *Obstet Gynecol*. 2016;214(1):123 e1- e18.  
36  
37 31. Kozhimannil KB, Shippee TP, Adegoke O, Vemig BA. Trends in hospital-based childbirth  
38  
39 care: the role of health insurance. *The American journal of managed care*. 2013;19(4):e125-32.  
40  
41 32. Nuesch E, Trelle S, Reichenbach S, Rutjes AW, Tschannen B, Altman DG, et al. Small study  
42  
43 effects in meta-analyses of osteoarthritis trials: meta-epidemiological study. *BMJ*. 2010;341:c3515.  
44  
45 33. Braveman P, Egerter S, Edmonston F, Verdon M. Racial/ethnic differences in the likelihood  
46  
47 of cesarean delivery, California. *American Journal of Public Health*. 1995;85(5):625-30.  
48  
49 34. Burns LR, Geller SE, Wholey DR. The effect of physician factors on the cesarean section  
50  
51 decision. *Medical care*. 1995;33(4):365-82.  
52  
53 35. Aron DC, Gordon HS, DiGiuseppe DL, Harper DL, Rosenthal GE. Variations in risk-adjusted  
54  
55 cesarean delivery rates according to race and health insurance. *Med Care*. 2000;38(1):35-44.  
56  
57  
58  
59  
60

- 1  
2  
3 36. Grant D. Explaining source of payment differences in U.S. cesarean rates: why do privately  
4 insured mothers receive more cesareans than mothers who are not privately insured? *Health Care*  
5 *Manag Sci.* 2005;8(1):5-17.  
6  
7  
8  
9 37. Korst LM, Gornbein JA, Gregory KD. Rethinking the cesarean rate: how pregnancy  
10 complications may affect interhospital comparisons. *Med Care.* 2005;43(3):237-45.  
11  
12  
13 38. Misra A. Impact of the HealthChoice program on cesarean section and vaginal birth after C-  
14 section deliveries: a retrospective analysis. *Matern Child Health J.* 2008;12(2):266-74.  
15  
16  
17 39. Huesch MD, Currid-Halkett E, Doctor JN. Measurement and risk adjustment of prelabor  
18 cesarean rates in a large sample of California hospitals. *Am J Obstet Gynecol.* 2014;210(5):443 e1-17.  
19  
20  
21 40. Lutomski JE, Murphy M, Devane D, Meaney S, Greene RA. Private health care coverage and  
22 increased risk of obstetric intervention. *BMC Pregnancy Childbirth.* 2014;14:13.  
23  
24  
25 41. Bannister-Tyrrell M, Patterson JA, Ford JB, Morris JM, Nicholl MC, Roberts CL. Variation  
26 in hospital caesarean section rates for preterm births. *Aust N Z J Obstet Gynaecol.* 2015;55(4):350-6.  
27  
28  
29 42. Sentell T, Chang A, Ahn HJ, Miyamura J. Maternal language and adverse birth outcomes in a  
30 statewide analysis. *Women & health.* 2016;56(3):257-80.  
31  
32  
33 43. Poobalan AS, Aucott LS, Gurung T, Smith WC, Bhattacharya S. Obesity as an independent  
34 risk factor for elective and emergency caesarean delivery in nulliparous women--systematic review  
35 and meta-analysis of cohort studies. *Obes Rev.* 2009;10(1):28-35.  
36  
37  
38 44. Merry L, Small R, Blondel B, Gagnon AJ. International migration and caesarean birth: a  
39 systematic review and meta-analysis. *BMC Pregnancy Childbirth.* 2013;13:27.  
40  
41  
42 45. Mishanina E, Rogozinska E, Thatthi T, Uddin-Khan R, Khan KS, Meads C. Use of labour  
43 induction and risk of cesarean delivery: a systematic review and meta-analysis. *CMAJ.*  
44  
45  
46 2014;186(9):665-73.  
47  
48  
49 46. Health Care System and Health Policy in Australia: The Commonwealth Fund; [Available  
50 from: [http://www.commonwealthfund.org/grants-and-fellowships/fellowships/australian-american-](http://www.commonwealthfund.org/grants-and-fellowships/fellowships/australian-american-health-policy-fellowship/health-care-system-and-health-policy-in-australia)  
51  
52 [health-policy-fellowship/health-care-system-and-health-policy-in-australia.](http://www.commonwealthfund.org/grants-and-fellowships/fellowships/australian-american-health-policy-fellowship/health-care-system-and-health-policy-in-australia)  
53  
54  
55 47. New hospital funding system next year: Irish Health; [Available from:  
56  
57 [http://www.irishhealth.com/article.html?id=21707.](http://www.irishhealth.com/article.html?id=21707)  
58  
59  
60

- 1  
2  
3 48. Bertollini R, DiLallo D, Spadea T, Perucci C. Cesarean section rates in Italy by hospital  
4 payment mode: an analysis based on birth certificates. *Am J Public Health*. 1992;82(2):257-61.  
5  
6  
7 49. Stafford RS. Cesarean section use and source of payment: An analysis of California hospital  
8 discharge abstracts. *American Journal of Public Health*. 1990;80(3):313-5.  
9  
10  
11 50. de Jong JD, Westert GP, Noetscher CM, Groenewegen PP. Does managed care make a  
12 difference? Physicians' length of stay decisions under managed and non-managed care. *BMC Health*  
13 *Serv Res*. 2004;4(1):3.  
14  
15  
16  
17 51. Wagstaff A. The demand for health: some new empirical evidence. *J Health Econ*.  
18 1986;5(3):195-233.  
19  
20  
21 52. Wagstaff A. The demand for health: theory and applications. *J Epidemiol Community Health*.  
22 1986;40(1):1-11.  
23  
24  
25 53. Haas JS, Udvarhelyi S, Epstein AM. The effect of health coverage for uninsured pregnant  
26 women on maternal health and the use of cesarean section. *JAMA*. 1993;270(1):61-4.  
27  
28  
29 54. Einarsdottir K, Kemp A, Hagggar FA, Moorin RE, Gunnell AS, Preen DB, et al. Increase in  
30 caesarean deliveries after the Australian Private Health Insurance Incentive policy reforms. *PLoS*  
31 *One*. 2012;7(7):e41436.  
32  
33  
34  
35 55. Burke SA, Normand C, Barry S, Thomas S. From universal health insurance to universal  
36 healthcare? The shifting health policy landscape in Ireland since the economic crisis. *Health Policy*.  
37 2016;120(3):235-40.  
38  
39  
40  
41 56. Hsia RY, Akosa Antwi Y, Weber E. Analysis of variation in charges and prices paid for  
42 vaginal and caesarean section births: a cross-sectional study. *BMJ Open*. 2014;4(1):e004017.  
43  
44  
45 57. Brown JR, Sox HC, Goodman DC. Financial incentives to improve quality: skating to the  
46 puck or avoiding the penalty box? *JAMA*. 2014;311(10):1009-10.  
47  
48  
49  
50  
51  
52  
53  
54  
55  
56  
57  
58  
59  
60

Table 1. Characteristics of included studies

| Author          | Year | Country       | Study design         | Number of cases | Number of hospital units | Year of data collection | Population                                      | Sampling    | Type of CS analysed |
|-----------------|------|---------------|----------------------|-----------------|--------------------------|-------------------------|-------------------------------------------------|-------------|---------------------|
| Stafford        | 1990 | United States | Cross sectional      | 461066          | Not reported             | 1986                    | Primi- and multiparae; any risk                 | Consecutive | Any                 |
| Haas et al. A   | 1993 | United States | Cross sectional      | 57257           | Not reported             | 1984                    | Primi- and multiparae; any risk                 | Consecutive | Any                 |
| Haas et al. B   | 1993 | United States | Cross sectional      | 64346           | Not reported             | 1987                    | Primi- and multiparae; any risk                 | Consecutive | Any                 |
| Braveman et al. | 1995 | United States | Retrospective cohort | 213761          | Unclear                  | 1991                    | Primiparae; no previous CS; any risk            | Consecutive | Any                 |
| Burns et al.    | 1995 | United States | Cross sectional      | 33233           | 36                       | 1989                    | Primi- and multiparae; any risk                 | Consecutive | Any                 |
| Aron et al.     | 2000 | United States | Retrospective cohort | 25697           | 21                       | 1993-1995               | Primiparae; no previous CS; any risk            | Consecutive | Any                 |
| Grant A         | 2005 | United States | Cross sectional      | 9017            | n/a                      | 1988                    | Primi- and multiparae; any risk                 | Random      | Any                 |
| Grant B         | 2005 | United States | Cross sectional      | 147821          | n/a                      | 1992                    | Primi- and multiparae; any risk                 | Consecutive | Any                 |
| Grant C         | 2005 | United States | Cross sectional      | 136763          | n/a                      | 1995                    | Primi- and multiparae; any risk                 | Consecutive | Any                 |
| Korst et al.    | 2005 | United States | Cross sectional      | 327632          | 288                      | 1995                    | Primi- and multiparae; no previous CS; any risk | Consecutive | Emergency           |
| Misra           | 2008 | United States | Cross sectional      | 128743          | Not reported             | 1995, 2000              | Primi- and multiparae; no previous CS; any risk | Consecutive | Emergency           |
| Coonrod et al.  | 2008 | United States | Cross sectional      | 28863           | 40                       | 2005                    | Primiparae; low risk                            | Consecutive | Any                 |
| Huesch          | 2011 | United States | Cross sectional      | 182108          | Not reported             | 2004-2007               | Primi- and multiparae; no previous CS; low risk | Consecutive | Planned             |

1  
2  
3  
4  
5  
6  
7  
8  
9  
10  
11  
12  
13  
14  
15  
16  
17  
18  
19  
20  
21  
22  
23  
24  
25  
26  
27  
28  
29  
30  
31  
32  
33  
34  
35  
36  
37  
38  
39  
40  
41  
42  
43  
44  
45  
46  
47  
48  
49

|                          |      |               |                      |         |              |           |                                                 |             |           |
|--------------------------|------|---------------|----------------------|---------|--------------|-----------|-------------------------------------------------|-------------|-----------|
| Movsas et al.            | 2012 | United States | Retrospective cohort | 617269  | NA           | 2004-2008 | Primi- and multiparae; any risk                 | Consecutive | Any       |
| Kozhimannil et al.       | 2013 | United States | Cross sectional      | 6717486 | Over 1000    | 2002-2009 | Primi- and multiparae; any risk                 | Random      | Any       |
| Lutomski et al.          | 2014 | Ireland       | Retrospective cohort | 403642  | 19           | 2005-2010 | Primi- and multiparae; any risk                 | Consecutive | Any       |
| Huesch et al.            | 2014 | United States | Cross sectional      | 408355  | 254          | 2010      | Primi- and multiparae; no previous CS; any risk | Consecutive | Planned   |
| Henke et al.             | 2014 | United States | Cross sectional      | 2516570 | Not reported | 2009      | Primi- and multiparae; no previous CS; low risk | Consecutive | Any       |
| Bannister-Tyrrell et al. | 2015 | Australia     | Cross sectional      | 20247   | 51           | 2007-2011 | Primi- and multiparae; high risk                | Consecutive | Any       |
| Sebastião et al.         | 2016 | United States | Retrospective cohort | 412192  | 122          | 2004-2011 | Primiparae; no previous CS; low risk            | Consecutive | Emergency |
| Sentell et al.           | 2016 | United States | Cross sectional      | 11419   | 4            | 2012      | Primi- and multiparae; any risk                 | Consecutive | Any       |

CS = caesarean section

## Figure legends

Figure 1. The flow diagram of review

Figure 2. Adjusted odds ratios of caesarean section

Figure 3. Stratified analyses/Legend: \*P for trend

Figure 4. Crude odds ratios of caesarean section

## Supporting information

Appendix 1. Reported exclusion criteria

Appendix 2. Characteristics of data used for analysis

Appendix 3. Covariates used for statistical adjustment

Appendix 4. QUIPS risk of bias (table)

Appendix 5. QUIPS risk of bias (chart)

Appendix 6. Funnel plot of adjusted ORs against their standard errors on a log scale

Appendix 7. Caesarean section rates in the United States

Appendix 8. Sensitivity analysis - Adjusted odds ratios of caesarean section

Appendix 9. Sensitivity analysis – Stratified analyses/Legend: \*P for trend

Appendix 10. Sensitivity analysis - Crude odds ratios of caesarean section

Appendix 11. Search strategy



1  
2  
3  
4  
5  
6  
7  
8  
9  
10  
11  
12  
13  
14  
15  
16  
17  
18  
19  
20  
21  
22  
23  
24  
25  
26  
27  
28  
29  
30  
31  
32  
33  
34  
35  
36  
37  
38  
39  
40  
41  
42  
43  
44  
45  
46  
47  
48  
49  
50  
51  
52  
53  
54  
55  
56  
57  
58  
59  
60

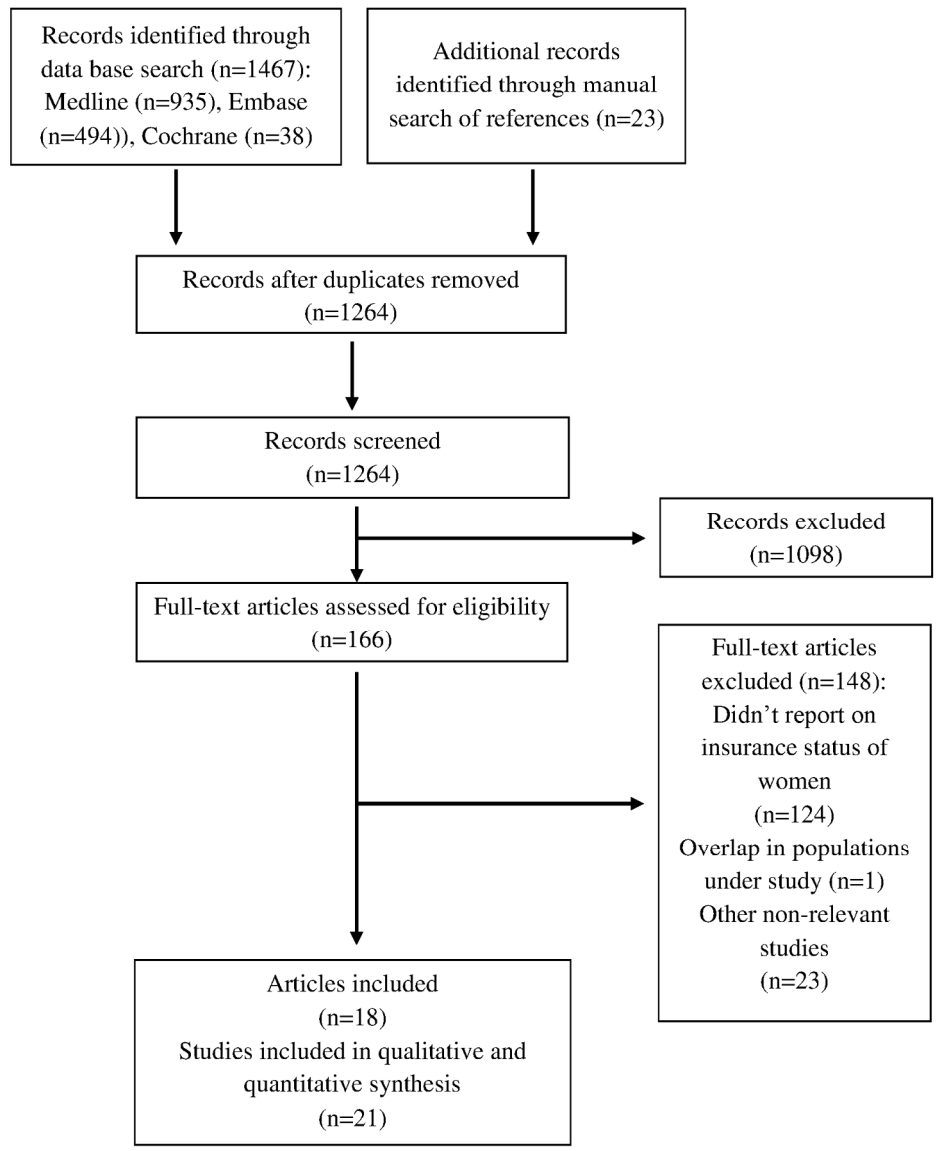

Figure 1. The flow diagram of review

164x201mm (300 x 300 DPI)

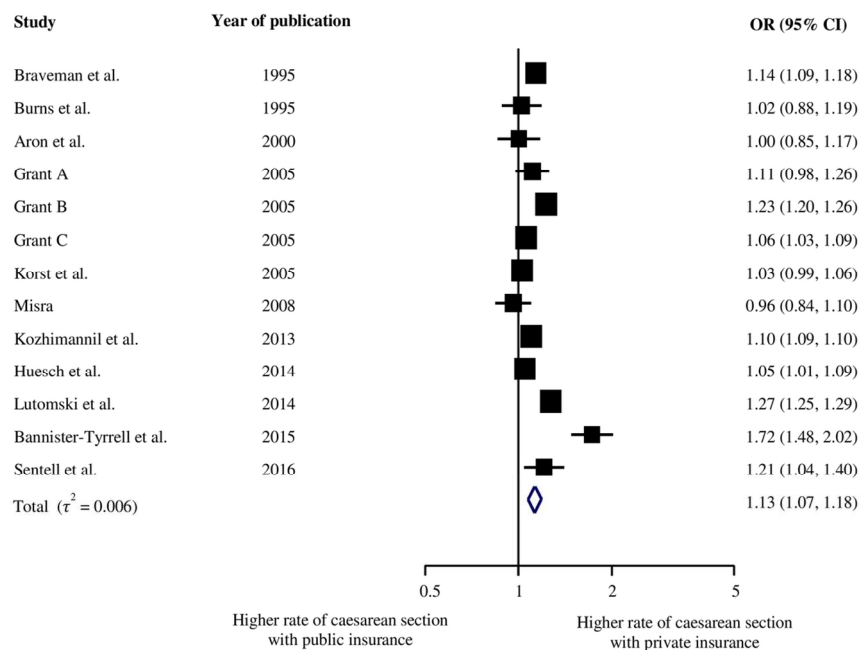

Figure 2. Adjusted odds ratios of caesarean section

118x83mm (300 x 300 DPI)

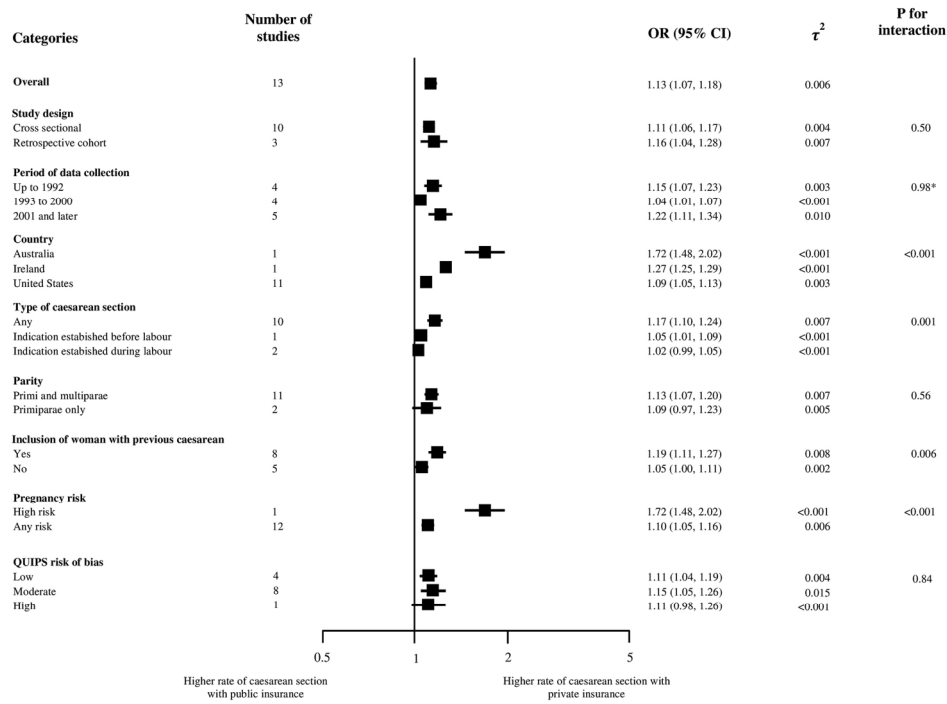

Figure 3. Stratified analyses/Legend: \*P for trend

155x109mm (300 x 300 DPI)

Review only

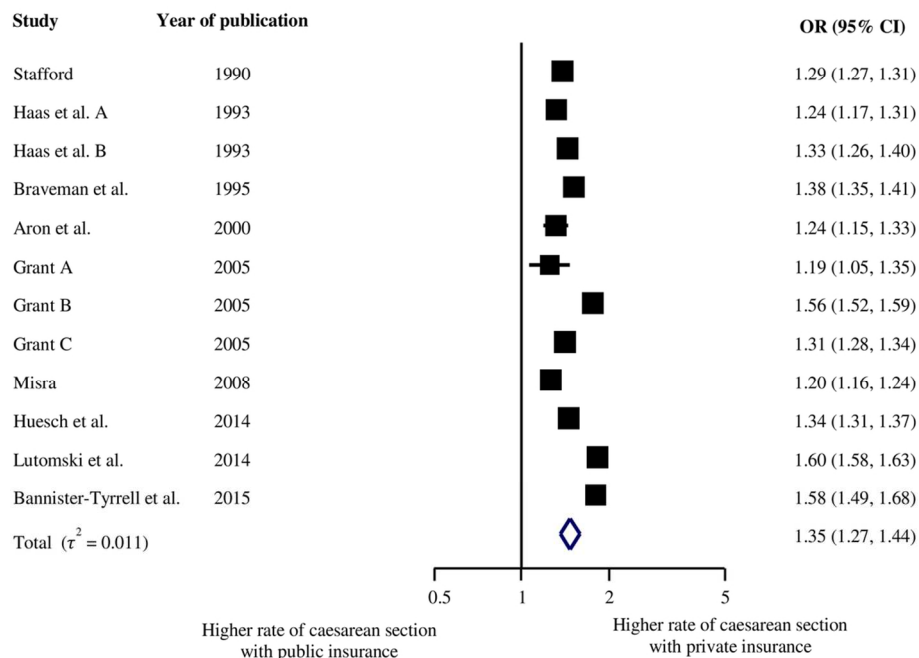

Figure 4. Crude odds ratios of caesarean section

108x76mm (300 x 300 DPI)

ew only

Appendix 1. Reported exclusion criteria

| Authors                  | Year | Source population                            | Maternal characteristics |                             |            |                            |                                          | Fetus characteristics |                                |                           |                     |                       |                                    |                                          |               |                         |                          |               |
|--------------------------|------|----------------------------------------------|--------------------------|-----------------------------|------------|----------------------------|------------------------------------------|-----------------------|--------------------------------|---------------------------|---------------------|-----------------------|------------------------------------|------------------------------------------|---------------|-------------------------|--------------------------|---------------|
|                          |      |                                              | Age ≤14                  | Racial or ethnic minorities | Multiparae | Previous caesarean section | Other risk factors for caesarean section | Stillbirth            | Multiple births (twin or more) | Newborn weighting <500 gr | Breach presentation | Other malpresentation | Preterm birth (less than 37 weeks) | Other risk factors for caesarean section | Not in labour | Cases with missing data | Provider characteristics | Other factors |
| Stafford                 | 1990 | All births in California, United States      |                          |                             |            |                            |                                          |                       |                                |                           |                     |                       |                                    |                                          |               |                         |                          | +             |
| Haas et al. A            | 1993 | All births in Massachusetts, United States   |                          |                             |            |                            |                                          |                       |                                | +                         | +                   | +                     |                                    |                                          |               |                         |                          | +             |
| Haas et al. B            | 1993 | All births in Massachusetts, United States   |                          |                             |            |                            |                                          |                       |                                | +                         | +                   | +                     |                                    |                                          |               |                         |                          | +             |
| Braveman et al.          | 1995 | All births in California, United States      |                          |                             | +          | +                          |                                          |                       |                                | +                         | +                   |                       |                                    | +                                        |               |                         |                          | +             |
| Burns et al.             | 1995 | All births in Arizona, United States         |                          |                             |            |                            |                                          |                       |                                |                           |                     |                       |                                    |                                          |               |                         |                          | +             |
| Aron et al.              | 2000 | All births in Cleveland, Ohio, United States |                          |                             |            | +                          |                                          |                       |                                |                           |                     |                       |                                    |                                          |               |                         |                          | +             |
| Grant A                  | 2005 | All births, United States                    |                          |                             |            |                            |                                          |                       |                                |                           |                     |                       |                                    |                                          |               |                         |                          | +             |
| Grant B                  | 2005 | All births in Florida, United States         |                          |                             |            |                            |                                          |                       |                                |                           |                     |                       |                                    |                                          |               |                         |                          | +             |
| Grant C                  | 2005 | All births in Florida, United States         |                          |                             |            |                            |                                          |                       |                                |                           |                     |                       |                                    |                                          |               |                         |                          | +             |
| Korst et al.             | 2005 | All births in California, United States      |                          |                             |            | +                          | +                                        |                       |                                | +                         | +                   |                       | +                                  | +                                        | +             |                         |                          | +             |
| Misra                    | 2008 | All births in Maryland, United States        |                          |                             |            | +                          |                                          |                       |                                |                           |                     |                       |                                    |                                          |               |                         |                          | +             |
| Coonrod et al.           | 2008 | All births in Arizona, United States         |                          | +                           | +          |                            |                                          |                       |                                | +                         | +                   |                       | +                                  | +                                        |               |                         |                          | +             |
| Huesch                   | 2011 | All births in New Jersey, United States      |                          |                             |            | +                          | +                                        |                       |                                | +                         | +                   |                       | +                                  | +                                        | +             |                         |                          | +             |
| Movsas et al.            | 2012 | All births in Michigan, United States        |                          |                             |            |                            |                                          |                       |                                | +                         |                     |                       |                                    |                                          |               |                         |                          | +             |
| Kozhimannil et al.       | 2013 | All births in 44 states, United States       |                          |                             |            |                            |                                          |                       |                                |                           |                     |                       |                                    |                                          |               |                         |                          | +             |
| Lutomski et al.          | 2014 | All births, Ireland                          |                          |                             |            |                            |                                          |                       |                                |                           |                     |                       |                                    |                                          |               |                         |                          | +             |
| Huesch et al.            | 2014 | All births in California, United States      | +                        |                             |            | +                          |                                          |                       |                                |                           |                     |                       |                                    |                                          |               |                         |                          | +             |
| Henke et al.             | 2014 | All births in 44 states, United States       |                          |                             |            | +                          |                                          |                       |                                | +                         | +                   |                       | +                                  | +                                        |               |                         |                          | +             |
| Bannister-Tyrrell et al. | 2015 | All births in New South Wales, Australia     |                          |                             |            |                            |                                          |                       |                                |                           |                     |                       |                                    |                                          |               |                         |                          | +             |
| Sebastião et al.         | 2016 | All births in Florida, United States         |                          |                             | +          | +                          |                                          |                       |                                | +                         | +                   |                       | +                                  | +                                        |               |                         |                          | +             |
| Sentell et al.           | 2016 | All births in Hawaii, United States          |                          |                             |            |                            |                                          |                       |                                |                           | +                   |                       |                                    |                                          |               |                         |                          | +             |

\*500 or less grams

## Appendix 2. Characteristics of data used for analysis

| Author                   | Year | Survey | Hospital records | Birth certificates/registry | Census data |
|--------------------------|------|--------|------------------|-----------------------------|-------------|
| Stafford                 | 1990 |        | +                |                             |             |
| Haas et al. A            | 1993 |        | +                | +                           |             |
| Haas et al. B            | 1993 |        | +                | +                           |             |
| Braveman et al.          | 1995 |        |                  | +                           | +           |
| Burns et al.             | 1995 |        | +                | +                           |             |
| Aron et al.              | 2000 |        | +                |                             |             |
| Grant A                  | 2005 | +      |                  |                             |             |
| Grant B                  | 2005 |        | +                |                             |             |
| Grant C                  | 2005 |        | +                |                             |             |
| Korst et al.             | 2005 |        | +                |                             |             |
| Misra                    | 2008 |        | +                |                             |             |
| Coonrod et al.           | 2008 |        |                  | +                           |             |
| Huesch                   | 2011 |        | +                |                             |             |
| Movsas et al.            | 2012 |        | +                | +                           |             |
| Kozhimannil et al.       | 2013 |        | +                |                             |             |
| Lutomski et al.          | 2014 |        | +                |                             |             |
| Huesch et al.            | 2014 |        | +                |                             |             |
| Henke et al.             | 2014 |        | +                |                             |             |
| Bannister-Tyrrell et al. | 2015 |        | +                |                             |             |
| Sebastião et al.         | 2016 |        | +                | +                           |             |
| Sentell et al.           | 2016 |        | +                |                             |             |

Appendix 3. Covariates used for statistical adjustment

| Author                   | Year | Maternal preconception status |                   |                |                 |                   |              |        |        |                 | Maternal clinical status |        |                            |                                            | Foetus characteristics                |                 |              |                       |               | Total number of covariates |                       |                          |                 |     |
|--------------------------|------|-------------------------------|-------------------|----------------|-----------------|-------------------|--------------|--------|--------|-----------------|--------------------------|--------|----------------------------|--------------------------------------------|---------------------------------------|-----------------|--------------|-----------------------|---------------|----------------------------|-----------------------|--------------------------|-----------------|-----|
|                          |      | Ethnicity/Race                | Educational level | Marital status | Economic status | Insurances status | Urban status | Weight | Height | Body mass index | Age                      | Parity | Previous caesarean section | Pre-existing (before pregnancy) conditions | Conditions developed during pregnancy | Gestational age | Birth weight | Other characteristics | Prenatal care |                            | Birth characteristics | Provider characteristics | Other variables |     |
| Stafford*                | 1990 |                               |                   |                |                 |                   |              |        |        |                 |                          |        |                            |                                            |                                       |                 |              |                       |               |                            |                       |                          | 0               |     |
| Haas et al. A*           | 1993 |                               |                   |                |                 |                   |              |        |        |                 |                          |        |                            |                                            |                                       |                 |              |                       |               |                            |                       |                          |                 | 0   |
| Haas et al. B*           | 1993 |                               |                   |                |                 |                   |              |        |        |                 |                          |        |                            |                                            |                                       |                 |              |                       |               |                            |                       |                          |                 | 0   |
| Braveman et al.          | 1995 | +                             | +                 | +              | +               | +                 |              |        |        | +               |                          |        | +                          |                                            |                                       | +               | +            | +                     | +             | ++                         | +                     |                          | 15              |     |
| Burns et al.             | 1995 | +                             | +                 |                |                 |                   |              |        |        | +               | +                        | +      |                            | ++                                         | +                                     | +               | ++           | +                     | ++            | ++                         |                       |                          |                 | 33  |
| Aron et al.              | 2000 |                               |                   |                |                 |                   |              |        |        | +               | +                        |        | ++                         | ++                                         | ++                                    | ++              | ++           | ++                    | ++            | ++                         | ++                    | ++                       |                 | 39  |
| Grant A                  | 2005 | ++                            | +                 | +              | +               |                   | +            | +      | +      | ++              |                          | +      | ++                         | ++                                         | +                                     | ++              | ++           | ++                    | ++            | ++                         | ++                    | ++                       |                 | 68  |
| Grant B                  | 2005 | ++                            |                   |                |                 |                   | +            |        |        | ++              |                          | +      | ++                         | ++                                         | +                                     | ++              | ++           | ++                    | ++            | ++                         | ++                    | ++                       |                 | 31  |
| Grant C                  | 2005 | ++                            |                   |                |                 |                   | +            |        |        | ++              |                          | +      | ++                         | ++                                         | +                                     | ++              | ++           | ++                    | ++            | ++                         | ++                    | ++                       |                 | 31  |
| Korst et al.             | 2005 | +                             |                   |                |                 |                   |              |        |        | +               |                          |        |                            |                                            |                                       |                 |              |                       |               |                            | ++                    |                          |                 | 6   |
| Misra                    | 2008 | +                             |                   |                |                 |                   |              |        |        | ++              |                          | ++     | ++                         |                                            |                                       |                 | ++           |                       | +             | ++                         | ++                    |                          | 30              |     |
| Coonrod et al.           | 2008 | +                             | +                 |                |                 |                   |              |        |        | +               |                          | ++     | +                          | +                                          | +                                     | +               | +            | +                     | ++            | ++                         |                       |                          | 20              |     |
| Huesch                   | 2011 | +                             |                   | +              |                 |                   | +            |        |        | +               |                          |        |                            |                                            |                                       |                 |              |                       |               | +                          | ++                    |                          | 8               |     |
| Movsas et al.            | 2012 | +                             |                   |                |                 |                   |              |        |        | +               | +                        | +      | +                          | +                                          | +                                     | +               | +            | +                     | +             | +                          | +                     | +                        | 9               |     |
| Kozhimannil et al.       | 2013 | +                             |                   |                |                 |                   |              |        |        | +               | +                        | +      | ++                         | ++                                         | +                                     | ++              | ++           | ++                    | ++            | ++                         | ++                    | ++                       |                 | 16  |
| Lutomski et al.          | 2014 |                               |                   |                |                 |                   |              |        |        | +               |                          | +      | ++                         | +                                          | +                                     | +               | +            | +                     | ++            | ++                         | ++                    | ++                       |                 | 6   |
| Huesch et al.            | 2014 | +                             |                   |                | +               |                   |              |        |        | +               |                          |        | ++                         | ++                                         | +                                     | ++              | ++           | ++                    | ++            | ++                         | ++                    | ++                       |                 | 124 |
| Henke et al.             | 2014 | +                             | +                 |                | +               |                   |              |        |        | +               |                          |        | ++                         | ++                                         | +                                     | ++              | ++           | ++                    | ++            | ++                         | ++                    | ++                       |                 | 28  |
| Bannister-Tyrrell et al. | 2015 |                               |                   |                |                 |                   |              |        |        |                 | +                        | +      | ++                         | ++                                         | +                                     | ++              | ++           | ++                    | ++            | ++                         | ++                    | ++                       |                 | 12  |
| Sebastião et al.         | 2016 |                               |                   |                |                 |                   |              |        |        |                 |                          |        |                            |                                            |                                       |                 |              |                       |               |                            |                       |                          |                 | 0   |
| Sentell et al. *         | 2016 | +                             |                   |                |                 |                   |              |        |        | +               | +                        |        | +                          |                                            |                                       |                 |              |                       |               | +                          | +                     |                          |                 | 6   |

+ One covariate adjusted for ++ Two or more covariates adjusted for

\*Stafford, Haas et al. and Sebastião et al. only reported crude estimates.

## Appendix 4. QUIPS risk of bias

| Author                   | Year | Study participation | Study attrition | Prognostic factor measurement | Outcome measurement | Study confounding | Statistical analysis and reporting | Overall rating |
|--------------------------|------|---------------------|-----------------|-------------------------------|---------------------|-------------------|------------------------------------|----------------|
| Stafford                 | 1990 | low                 | low             | low                           | low                 | high              | moderate                           | high           |
| Haas et al. A            | 1993 | low                 | low             | low                           | low                 | high              | moderate                           | high           |
| Haas et al. B            | 1993 | low                 | low             | low                           | low                 | high              | moderate                           | high           |
| Braveman et al.          | 1995 | low                 | low             | low                           | low                 | moderate          | low                                | moderate       |
| Burns et al.             | 1995 | low                 | low             | low                           | low                 | moderate          | low                                | moderate       |
| Aron et al.              | 2000 | low                 | low             | low                           | low                 | low               | low                                | low            |
| Grant A                  | 2005 | moderate            | high            | low                           | low                 | low               | low                                | high           |
| Grant B                  | 2005 | low                 | low             | low                           | low                 | low               | low                                | low            |
| Grant C                  | 2005 | low                 | low             | low                           | low                 | low               | low                                | low            |
| Korst et al.             | 2005 | low                 | low             | low                           | low                 | moderate          | low                                | moderate       |
| Misra                    | 2008 | low                 | low             | low                           | low                 | moderate          | low                                | moderate       |
| Coonrod et al.           | 2008 | low                 | low             | low                           | low                 | low               | low                                | low            |
| Huesch                   | 2011 | low                 | low             | low                           | low                 | low               | low                                | low            |
| Movsas et al.            | 2012 | low                 | low             | low                           | low                 | moderate          | low                                | moderate       |
| Kozhimannil et al.       | 2013 | low                 | low             | low                           | low                 | low               | low                                | low            |
| Lutomski et al.          | 2014 | low                 | low             | low                           | low                 | moderate          | low                                | moderate       |
| Huesch et al.            | 2014 | low                 | low             | low                           | low                 | moderate          | low                                | moderate       |
| Henke et al.             | 2014 | low                 | low             | low                           | low                 | moderate          | low                                | moderate       |
| Bannister-Tyrrell et al. | 2015 | low                 | low             | low                           | low                 | moderate          | low                                | moderate       |
| Sebastião et al.         | 2016 | low                 | low             | low                           | low                 | high              | moderate                           | high           |
| Sentell et al.           | 2016 | low                 | low             | low                           | low                 | moderate          | low                                | moderate       |



### Appendix 5 - QUIPS risk of bias

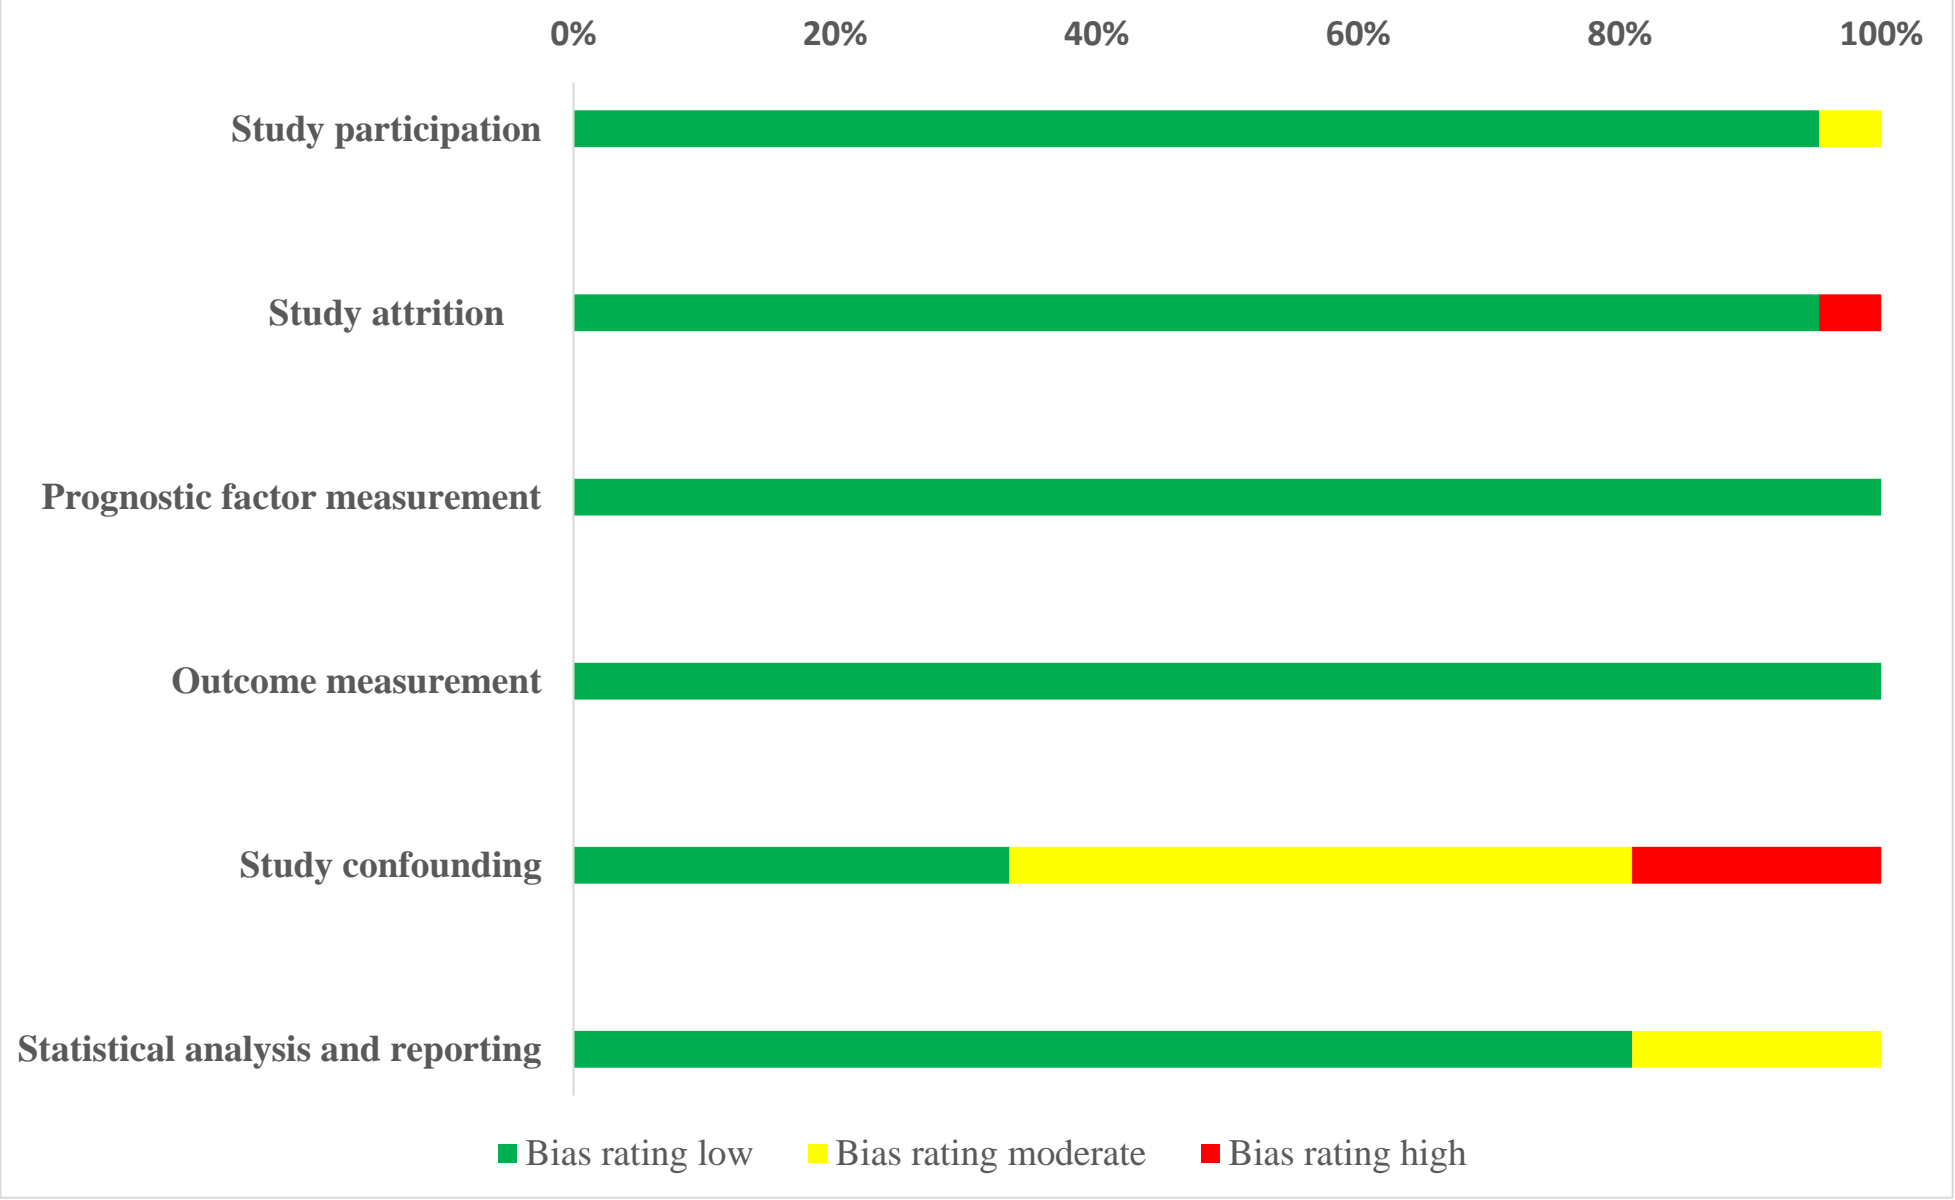

## Appendix 6. Funnel plot of adjusted ORs against their standard errors on a log scale

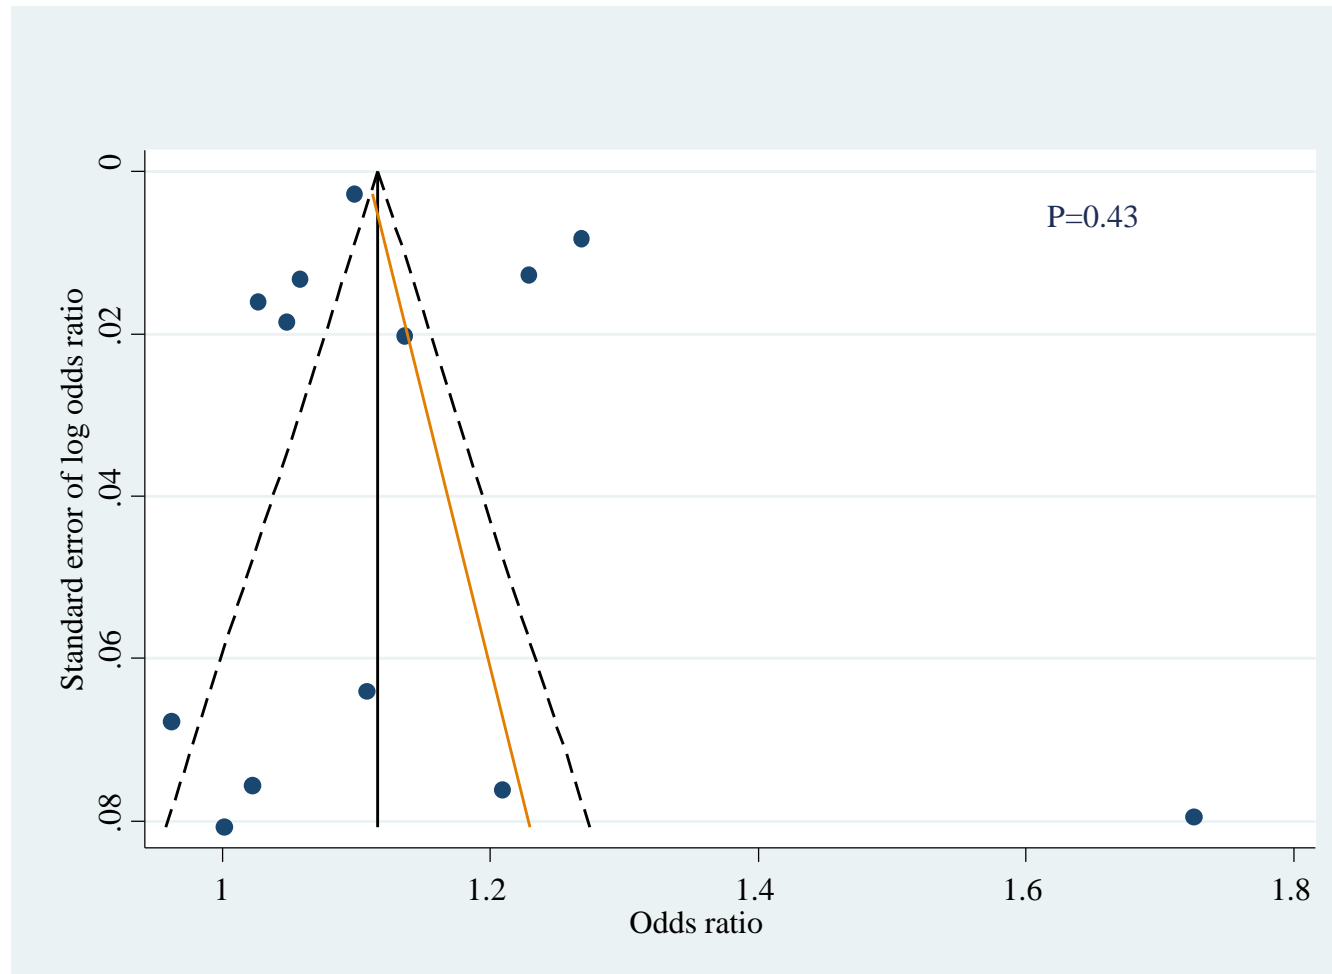

### Appendix 7. Caesarean section rates in the United States

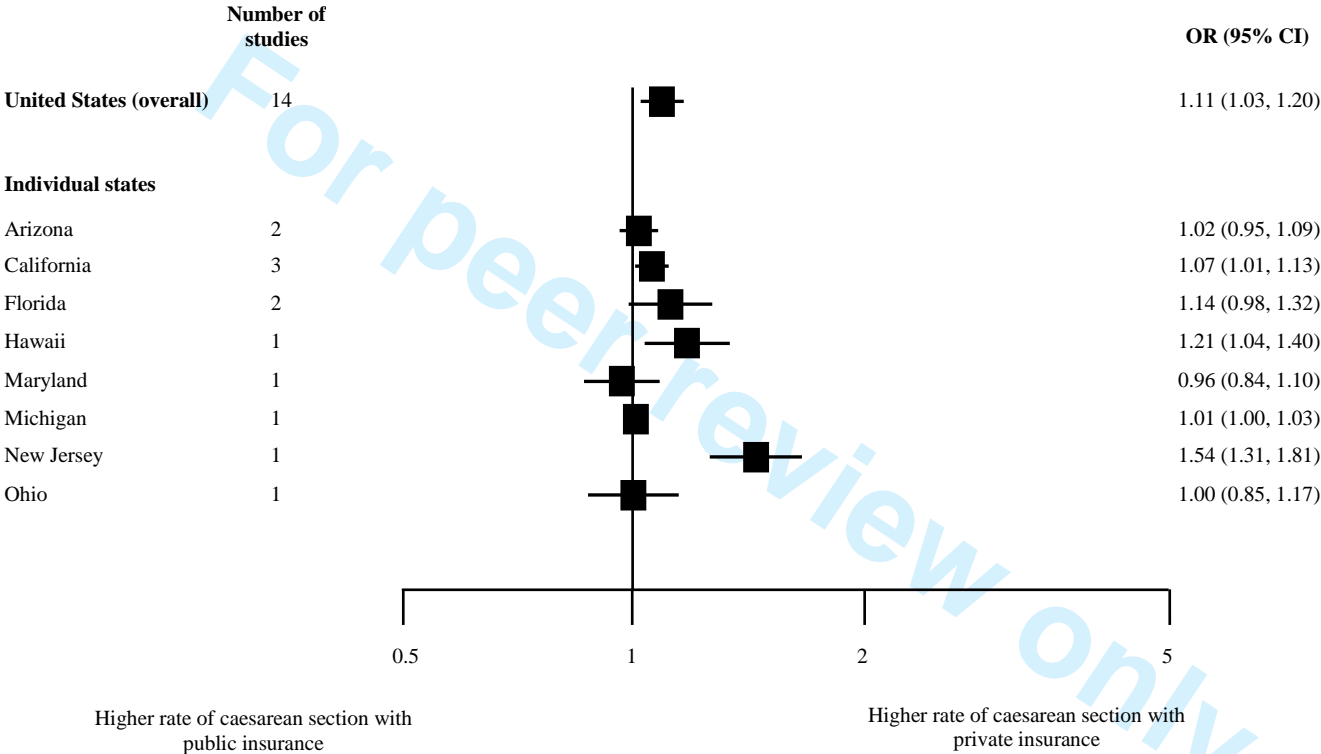

1  
2  
3  
4  
5  
6  
7  
8  
9  
10  
11  
12  
13  
14  
15  
16  
17  
18  
19  
20  
21  
22  
23  
24  
25  
26  
27  
28  
29  
30  
31  
32  
33  
34  
35  
36  
37  
38  
39  
40  
41  
42  
43  
44  
45  
46  
47

Appendix 8. Sensitivity analysis - Adjusted odds ratios of caesarean section

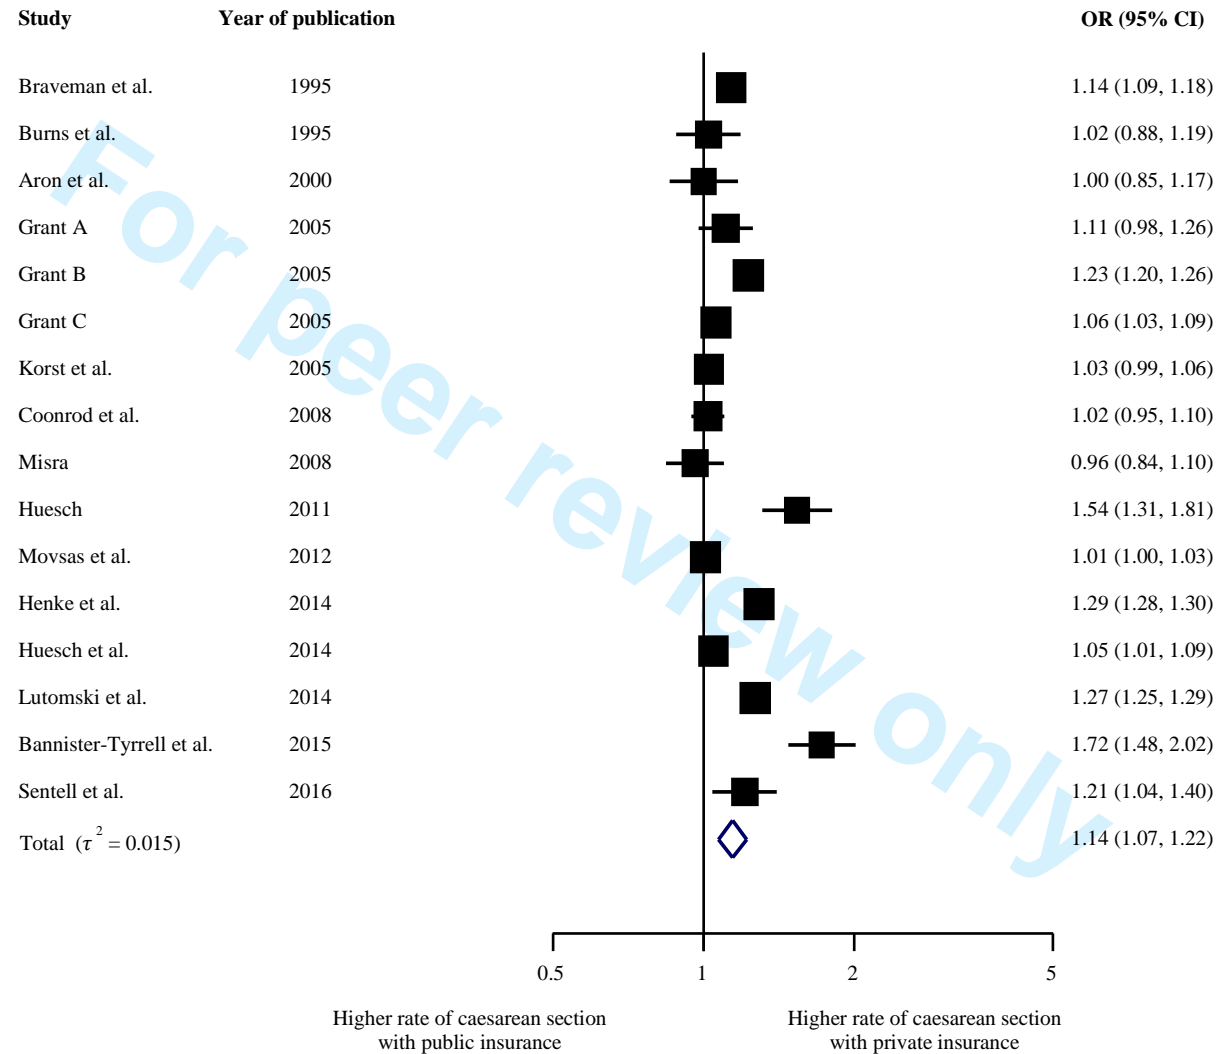

Appendix 9. Sensitivity analysis – Stratified analyses

1  
2  
3  
4  
5  
6  
7  
8  
9  
10  
11  
12  
13  
14  
15  
16  
17  
18  
19  
20  
21  
22  
23  
24  
25  
26  
27  
28  
29  
30  
31  
32  
33  
34  
35  
36  
37  
38  
39  
40  
41  
42  
43  
44  
45  
46  
47

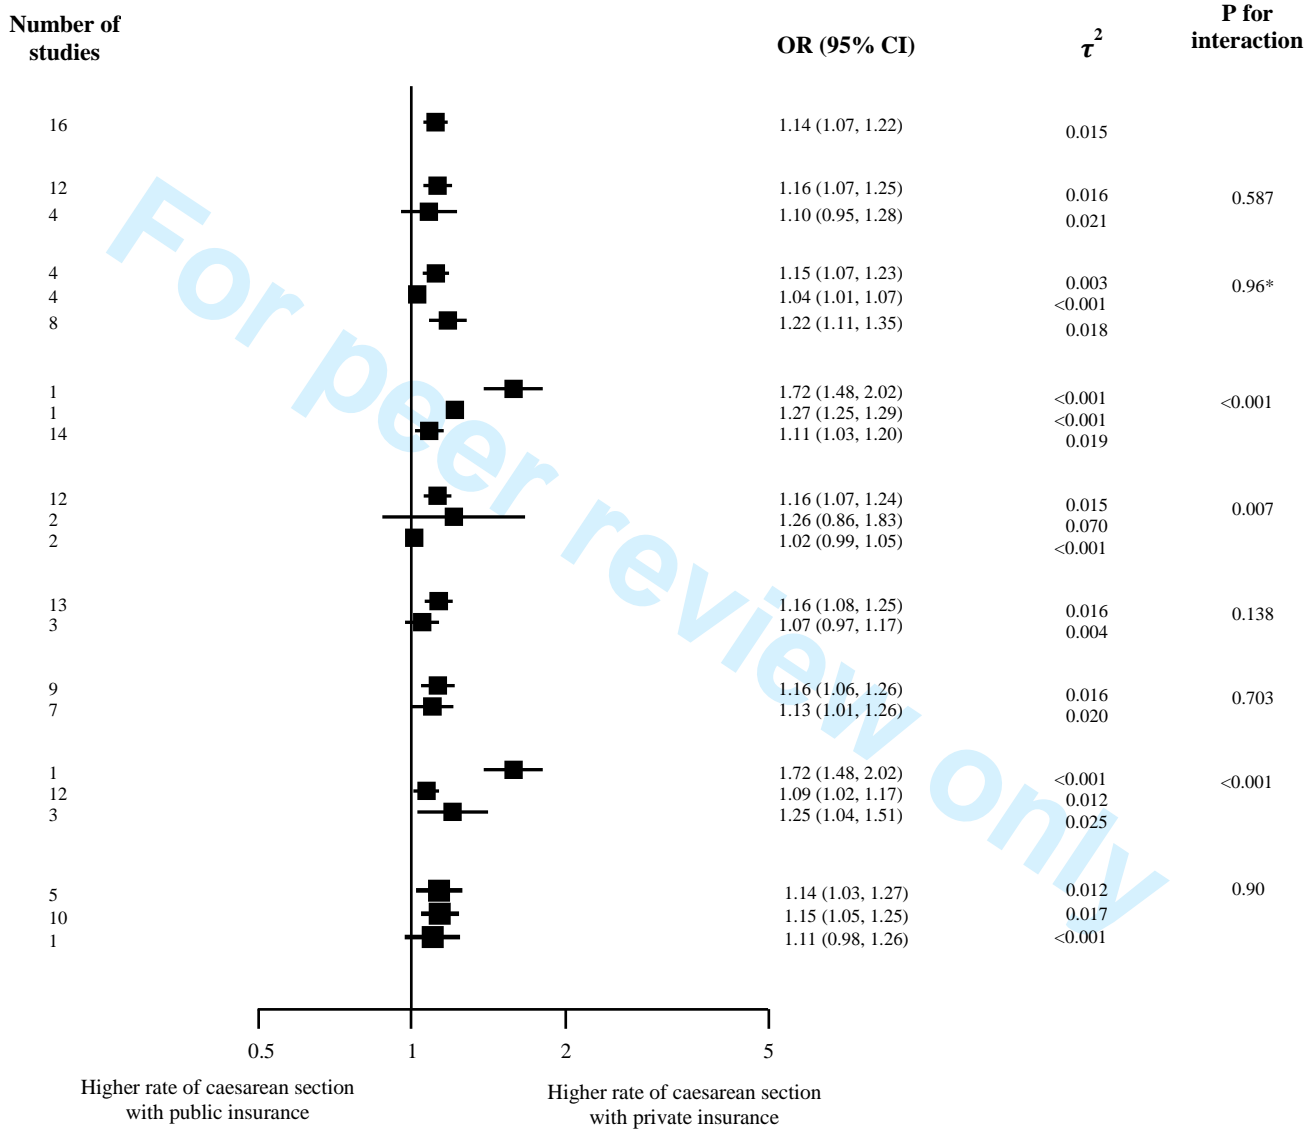

\*P for trend

Appendix 10. Sensitivity analysis - Crude odds ratios of caesarean section

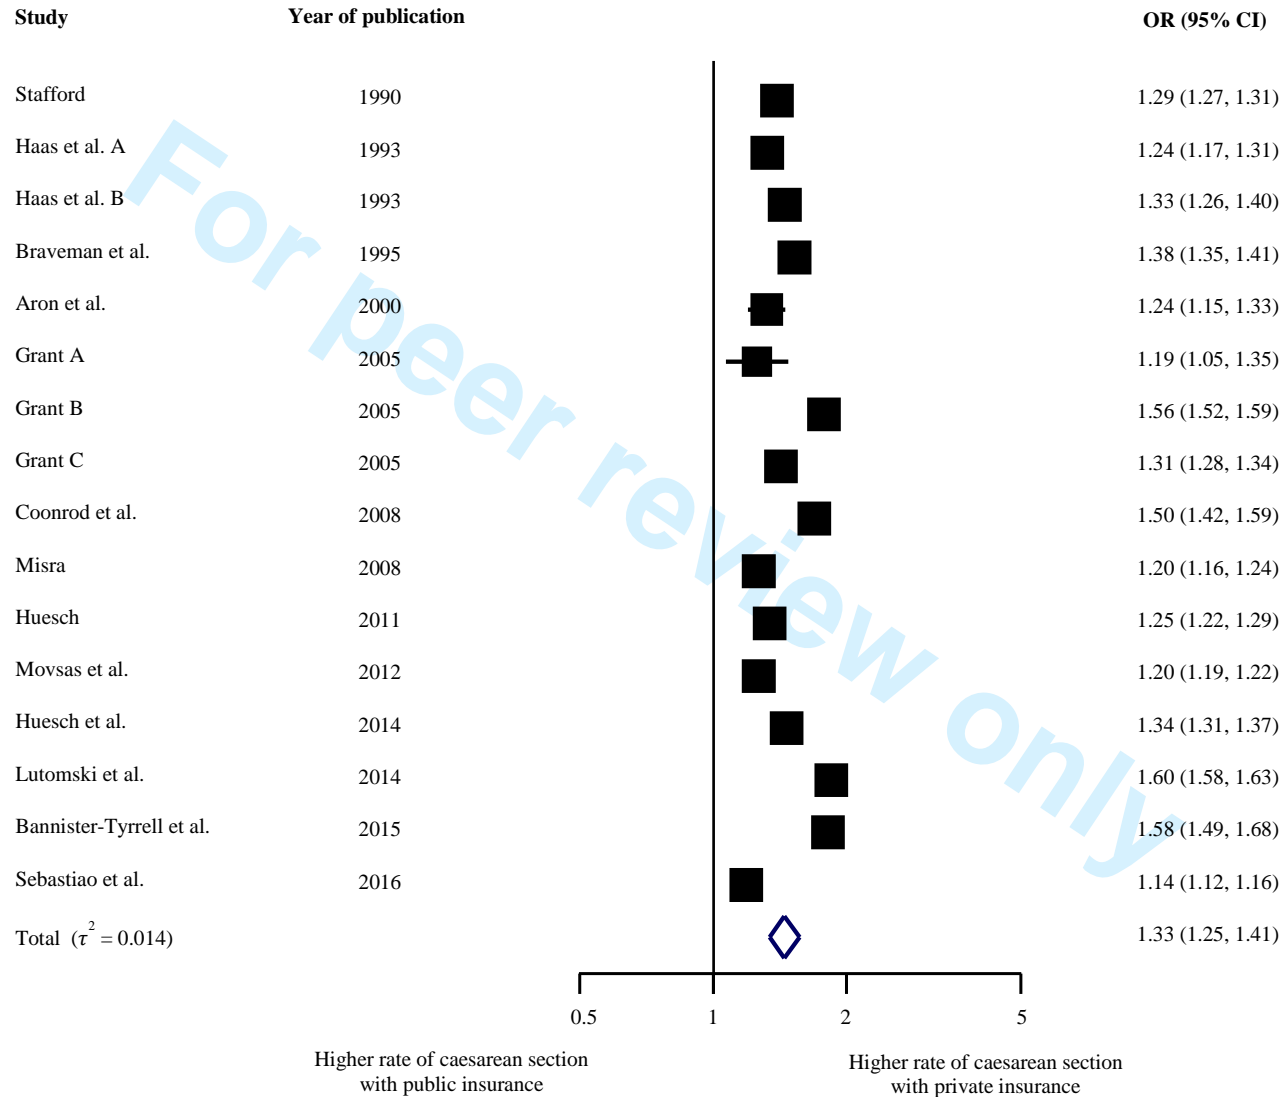

## Appendix 11. Search Strategy

### 1. For Medline (PubMed)

((((((causes OR determinants OR statistics OR rates OR factors OR decision\* OR physician\* OR socioeconomic OR state medicine OR evidence-based OR hospital OR hospitals OR hospitalization OR hospitalized OR uncertain\* OR educational status OR social class OR obstetric\* OR gynecolog\* OR supply OR distribut\* OR utilization OR insurance OR choice OR attitude OR patient OR economics OR maternal OR accessib\* OR health service\* OR rural population OR urban population[Title/Abstract])) NOT medline[sb])) OR ("Decision Making"[Mesh] OR "Physician's Practice Patterns"[Mesh] OR "Socioeconomic Factors"[Mesh] OR "State Medicine"[Mesh] OR "Evidence-Based Medicine"[Mesh] OR "Hospitals"[Mesh] OR "Uncertainty"[Mesh] OR "Educational Status"[Mesh] OR "Hospital Costs"[Mesh] OR "Physician Incentive Plans"[Mesh] OR "Social Class"[Mesh] OR "Obstetrics and Gynecology Department, Hospital"[Mesh] OR "supply and distribution"[Subheading] OR "utilization"[Subheading] OR "Insurance"[Mesh] OR "Choice Behavior"[Mesh] OR "Attitude to Health"[Mesh] OR "Patient Participation"[Mesh] OR "Physician-Patient Relations"[Mesh] OR "Economics, Hospital"[Mesh] OR "Maternal Health Services"[Mesh] OR "Health Services Accessibility"[Mesh] OR "Health Services Research"[Mesh] OR "Rural Population"[Mesh] OR "Urban Population"[Mesh]))) OR factors OR rates OR statistics OR causes OR determinants AND (((((operative delivery OR caesarean section OR cesarean section OR c-section OR c section OR caesarean OR cesarean OR caesarean delivery OR cesarean delivery OR caesarean rates OR cesarean rates)))) OR cesarean section [MeSH Terms])) AND (((("Catchment Area (Health)"[Mesh] OR "Small-Area Analysis"[Mesh]))) OR (((small area analysis OR small area analyses OR medical practice variation OR regions OR geographic variation OR variation))))))

### 2. Embase (Ovid SP)

| HF | # ▲ | Searches                                                                                                                                   | Results | Search Type | Actions            |
|----|-----|--------------------------------------------------------------------------------------------------------------------------------------------|---------|-------------|--------------------|
| HF | 1   | decision making/                                                                                                                           | 134077  | Advanced    | Display<br>More >> |
| HF | 2   | professional practice/ or group practice/ or health care practice/ or medical practice/                                                    | 129049  | Advanced    | Display<br>More >> |
| HF | 3   | socioeconomics/                                                                                                                            | 110558  | Advanced    | Display<br>More >> |
| HF | 4   | state medicine.mp. or national health service/                                                                                             | 54605   | Advanced    | Display<br>More >> |
| HF | 5   | evidence based medicine/                                                                                                                   | 80825   | Advanced    | Display<br>More >> |
| HF | 6   | hospital/                                                                                                                                  | 216188  | Advanced    | Display<br>More >> |
| HF | 7   | uncertainty/                                                                                                                               | 6158    | Advanced    | Display<br>More >> |
| HF | 8   | educational status/                                                                                                                        | 36032   | Advanced    | Display<br>More >> |
| HF | 9   | "hospital cost"/                                                                                                                           | 13192   | Advanced    | Display<br>More >> |
| HF | 10  | physician incentive plans.mp. or personnel management/                                                                                     | 49572   | Advanced    | Display<br>More >> |
| HF | 11  | social class/                                                                                                                              | 26291   | Advanced    | Display<br>More >> |
| HF | 12  | hospital department/                                                                                                                       | 21809   | Advanced    | Display<br>More >> |
| HF | 13  | obstetrics/                                                                                                                                | 27326   | Advanced    | Display<br>More >> |
| HF | 14  | gynecology/                                                                                                                                | 29917   | Advanced    | Display<br>More >> |
| HF | 15  | For peer review only - <a href="http://bmjopen.bmj.com/site/about/guidelines.xhtml">http://bmjopen.bmj.com/site/about/guidelines.xhtml</a> |         | Advanced    | Display<br>More >> |

|    |    |                                                                                                                                                                                                            |         |          |                              |
|----|----|------------------------------------------------------------------------------------------------------------------------------------------------------------------------------------------------------------|---------|----------|------------------------------|
| HF | 16 | 12 and 15                                                                                                                                                                                                  | 413     | Advanced | Display<br>More >>           |
| HF | 17 | health care distribution/                                                                                                                                                                                  | 2333    | Advanced | Display<br>More >>           |
| HF | 18 | health care utilization/                                                                                                                                                                                   | 36879   | Advanced | Display<br>More >>           |
| HF | 19 | insurance/                                                                                                                                                                                                 | 33934   | Advanced | Display<br>More >>           |
| HF | 20 | choice behavior.mp.                                                                                                                                                                                        | 765     | Advanced | Display<br>More >>           |
| HF | 21 | attitude to health/                                                                                                                                                                                        | 81021   | Advanced | Display<br>More >>           |
| HF | 22 | patient participation/                                                                                                                                                                                     | 16400   | Advanced | Display<br>More >>           |
| HF | 23 | doctor patient relation/                                                                                                                                                                                   | 81043   | Advanced | Display<br>More >>           |
| HF | 24 | health economics/                                                                                                                                                                                          | 33098   | Advanced | Display<br>More >>           |
| HF | 25 | obstetric procedure/                                                                                                                                                                                       | 550     | Advanced | Display<br>More >>           |
| HF | 26 | health care access/                                                                                                                                                                                        | 34433   | Advanced | Display                      |
| HF | 27 | health services research/                                                                                                                                                                                  | 27579   | Advanced | Display<br>More >>           |
| HF | 28 | geographic distribution/                                                                                                                                                                                   | 132846  | Advanced | Display<br>More >>           |
| HF | 29 | rural population/                                                                                                                                                                                          | 30219   | Advanced | Display<br>More >>           |
| HF | 30 | urban population/                                                                                                                                                                                          | 35323   | Advanced | Display<br>More >>           |
| HF | 31 | causes/                                                                                                                                                                                                    | 0       | Advanced | Delete<br>More >>            |
| HF | 32 | determinants/                                                                                                                                                                                              | 1       | Advanced | Display<br>More >>           |
| HF | 33 | statistics/                                                                                                                                                                                                | 301146  | Advanced | Display<br>More >>           |
| HF | 34 | rates/                                                                                                                                                                                                     | 0       | Advanced | Delete<br>More >>            |
| HF | 35 | factors/                                                                                                                                                                                                   | 0       | Advanced | Delete<br>More >>            |
| HF | 36 | 1 or 2 or 3 or 4 or 5 or 6 or 7 or 8 or 9 or 10 or 11 or 16 or 17 or 18 or 19 or 20 or 21 or 22 or 23 or 24 or 25 or 26 or 27 or 29 or 30 or 32 or 33                                                      | 1340916 | Advanced | Display<br>More >>           |
| HF | 37 | cesarean section/                                                                                                                                                                                          | 59755   | Advanced | Display<br>More >>           |
| HF | 38 | (caesarean section or cesarean section or c-section or c section or caesarean or cesarean or caesarean delivery or cesarean delivery or caesarean rates or cesarean rates or operative delivery).ti,ab,tw. | 53950   | Advanced | Display<br>Delete<br>More >> |
| HF | 39 | 37 or 38                                                                                                                                                                                                   | 73014   | Advanced | Display<br>More >>           |
| HF | 40 | (small area analysis or small area analyses or small aera or medical practice variation or regions or geographic variation or variation or variations).ti,ab,tw.                                           | 964890  | Advanced | Display<br>More >>           |
| HF | 41 | 28 or 40                                                                                                                                                                                                   | 1082827 | Advanced | Display<br>More >>           |
| HF | 42 | 36 and 39 and 41                                                                                                                                                                                           | 357     | Advanced | Display<br>More >>           |

### 3. Cochrane Library

Caesarean section and insurance



## Research Checklist

1  
2 According to MOOSE statement for meta-analyses of observational studies  
3  
4  
5

### Reporting of background should include

### Where to find in manuscript

8 Problem definition

Manuscript (page 5)

10 Hypothesis statement

Manuscript (page 5)

13 Description of study outcome(s)

Manuscript (page 6)

16 Type of exposure or intervention used

Manuscript (page 6)

18 Type of study designs used

Manuscript (Table 1)

21 Study population

Manuscript (Table 1, Appendix 1)

### Reporting of search strategy should include

25 Qualifications of searchers (eg, librarians and investigators)

Manuscript (page 6)

28 Search strategy, including time period included in the synthesis and

Manuscript (page 5, 6), Appendix 11

30 keywords

32 Effort to include all available studies, including contact with authors

Manuscript (page 5-6)

35 Databases and registries searched

Manuscript (page 6)

37 Search software used, name and version, including special features

Manuscript (page 6)

40 used (eg, explosion)

42 Use of hand searching (eg, reference lists of obtained articles)

Manuscript (page 6)

44 List of citations located and those excluded, including justification

Figure 1

47 Method of addressing articles published in languages other than

n/a

49 English

51 Method of handling abstracts and unpublished studies

Manuscript (page 6)

54 Description of any contact with authors

No contact made

### Reporting of methods should include

58 Description of relevance or appropriateness of studies assembled for

Manuscript (page 6)

60 assessing the hypothesis to be tested

|                                                                                                                                             |                                                                                                                                                                                                                                                                              |                                                        |
|---------------------------------------------------------------------------------------------------------------------------------------------|------------------------------------------------------------------------------------------------------------------------------------------------------------------------------------------------------------------------------------------------------------------------------|--------------------------------------------------------|
| 1<br>2<br>3<br>4<br>5<br>6<br>7<br>8                                                                                                        | Rationale for the selection and coding of data (eg, sound clinical principles or convenience)                                                                                                                                                                                | Manuscript (page 6)                                    |
| 9<br>10<br>11<br>12<br>13<br>14<br>15<br>16<br>17<br>18<br>19<br>20<br>21<br>22<br>23<br>24<br>25<br>26<br>27<br>28<br>29<br>30<br>31<br>32 | Documentation of how data were classified and coded (eg, multiple raters, blinding, and interrater reliability)                                                                                                                                                              | Manuscript (pages 6)                                   |
| 33<br>34<br>35<br>36<br>37                                                                                                                  | Assessment of confounding (eg, comparability of cases and controls in studies where appropriate)                                                                                                                                                                             | Manuscript (page 6-7)<br>Appendix 3, 4, 5              |
| 38<br>39<br>40<br>41<br>42<br>43<br>44<br>45<br>46<br>47<br>48<br>49<br>50<br>51<br>52<br>53<br>54<br>55<br>56<br>57<br>58<br>59<br>60      | Assessment of study quality, including blinding of quality assessors; stratification or regression on possible predictors of study results                                                                                                                                   | Page 7, Appendix 4, 5                                  |
|                                                                                                                                             | Assessment of heterogeneity                                                                                                                                                                                                                                                  | Manuscript (page 6-7)                                  |
|                                                                                                                                             | Description of statistical methods (eg, complete description of fixed or random effects models, justification of whether the chosen models account for predictors of study results, dose-response models, or cumulative meta-analysis) in sufficient detail to be replicated | Manuscript (page 6-7)                                  |
|                                                                                                                                             | Provision of appropriate tables and graphics                                                                                                                                                                                                                                 | Manuscript, Table 1, Figure 1-3 and<br>Appendixes 1-10 |
|                                                                                                                                             | <b>Reporting of results should include</b>                                                                                                                                                                                                                                   |                                                        |
|                                                                                                                                             | Graphic summarizing individual study estimates and overall estimate                                                                                                                                                                                                          | Figure 2, 4                                            |
|                                                                                                                                             | Table giving descriptive information for each study included                                                                                                                                                                                                                 | Table 1                                                |
|                                                                                                                                             | Results of sensitivity testing (eg, subgroup analysis)                                                                                                                                                                                                                       | Figure 3, Appendixes 6, 8, 9, 10                       |
|                                                                                                                                             | Indication of statistical uncertainty of findings                                                                                                                                                                                                                            | Manuscript, Figure 2-4                                 |
|                                                                                                                                             | <b>Reporting of discussion should include</b>                                                                                                                                                                                                                                |                                                        |
|                                                                                                                                             | Quantitative assessment of bias (eg, publication bias)                                                                                                                                                                                                                       | Manuscript (page 8-9)                                  |
|                                                                                                                                             | Justification for exclusion (eg, exclusion of non—English-language citations)                                                                                                                                                                                                | 11                                                     |
|                                                                                                                                             | Assessment of quality of included studies                                                                                                                                                                                                                                    | Page 11                                                |

**Reporting of conclusions should include**

- 1
- 2 Consideration of alternative explanations for observed results Manuscript (pages 11-13)
- 3
- 4 Generalization of the conclusions (ie, appropriate for the data Manuscript (page 14)
- 5
- 6 presented and within the domain of the literature review)
- 7
- 8
- 9 Guidelines for future research Manuscript (page 14)
- 10
- 11 Disclosure of funding source Manuscript (page 16)
- 12
- 13
- 14
- 15
- 16
- 17
- 18
- 19
- 20
- 21
- 22
- 23
- 24
- 25
- 26
- 27
- 28
- 29
- 30
- 31
- 32
- 33
- 34
- 35
- 36
- 37
- 38
- 39
- 40
- 41
- 42
- 43
- 44
- 45
- 46
- 47
- 48
- 49
- 50
- 51
- 52
- 53
- 54
- 55
- 56
- 57
- 58
- 59
- 60

For peer review only

1  
2  
3  
4  
5  
6  
7  
8  
9  
10  
11  
12  
13  
14  
15  
16  
17  
18  
19  
20  
21  
22  
23  
24  
25  
26  
27  
28  
29  
30  
31  
32  
33  
34  
35  
36  
37  
38  
39  
40  
41  
42  
43  
44  
45  
46  
47

## PRISMA checklist

|                           |   |                                                                                                                                                                                                                                                                                                             |                                       |
|---------------------------|---|-------------------------------------------------------------------------------------------------------------------------------------------------------------------------------------------------------------------------------------------------------------------------------------------------------------|---------------------------------------|
|                           |   |                                                                                                                                                                                                                                                                                                             |                                       |
| <b>TITLE</b>              |   |                                                                                                                                                                                                                                                                                                             |                                       |
| Title                     | 1 | Identify the report as a systematic review, meta-analysis, or both.                                                                                                                                                                                                                                         | Page 1, 2                             |
| <b>ABSTRACT</b>           |   |                                                                                                                                                                                                                                                                                                             |                                       |
| Structured summary        | 2 | Provide a structured summary including, as applicable: background; objectives; data sources; study eligibility criteria, participants, and interventions; study appraisal and synthesis methods; results; limitations; conclusions and implications of key findings; systematic review registration number. | Page 2,3                              |
| <b>INTRODUCTION</b>       |   |                                                                                                                                                                                                                                                                                                             |                                       |
| Rationale                 | 3 | Describe the rationale for the review in the context of what is already known.                                                                                                                                                                                                                              | Page 5                                |
| Objectives                | 4 | Provide an explicit statement of questions being addressed with reference to participants, interventions, comparisons, outcomes, and study design (PICOS).                                                                                                                                                  | Page 5,6                              |
| <b>METHODS</b>            |   |                                                                                                                                                                                                                                                                                                             |                                       |
| Protocol and registration | 5 | Indicate if a review protocol exists, if and where it can be accessed (e.g., Web address), and, if available, provide registration information including registration number.                                                                                                                               | No published protocol or registration |
| Eligibility criteria      | 6 | Specify study characteristics (e.g., PICOS, length of follow-up) and report characteristics (e.g., years considered, language, publication status) used as criteria for eligibility, giving rationale.                                                                                                      | Page 6                                |
| Information sources       | 7 | Describe all information sources (e.g., databases with dates of coverage, contact with study authors to identify additional studies) in the search and date last searched.                                                                                                                                  | Page 5, 6                             |
| Search                    | 8 | Present full electronic search strategy for at least one database, including any limits used, such that it could be repeated.                                                                                                                                                                               | Appendix 11                           |
| Study selection           | 9 | State the process for selecting studies (i.e., screening, eligibility, included in systematic review, and, if applicable, included in the meta-analysis).                                                                                                                                                   | Page 6, Fig 1                         |

|                                                                                                                                                          |                                    |    |                                                                                                                                                                                                                        |                           |
|----------------------------------------------------------------------------------------------------------------------------------------------------------|------------------------------------|----|------------------------------------------------------------------------------------------------------------------------------------------------------------------------------------------------------------------------|---------------------------|
| 1<br>2<br>3<br>4<br>5<br>6<br>7<br>8<br>9<br>10<br>11<br>12<br>13<br>14<br>15<br>16<br>17<br>18<br>19<br>20<br>21                                        | Data collection process            | 10 | Describe method of data extraction from reports (e.g., piloted forms, independently, in duplicate) and any processes for obtaining and confirming data from investigators.                                             | Page 6                    |
| 22<br>23<br>24<br>25<br>26<br>27<br>28<br>29<br>30<br>31<br>32<br>33<br>34<br>35<br>36<br>37<br>38<br>39<br>40<br>41<br>42<br>43<br>44<br>45<br>46<br>47 | Data items                         | 11 | List and define all variables for which data were sought (e.g., PICOS, funding sources) and any assumptions and simplifications made.                                                                                  | Page 6                    |
|                                                                                                                                                          | Risk of bias in individual studies | 12 | Describe methods used for assessing risk of bias of individual studies (including specification of whether this was done at the study or outcome level), and how this information is to be used in any data synthesis. | Page 6, 7                 |
|                                                                                                                                                          | Summary measures                   | 13 | State the principal summary measures (e.g., risk ratio, difference in means).                                                                                                                                          | Page 6                    |
|                                                                                                                                                          | Synthesis of results               | 14 | Describe the methods of handling data and combining results of studies, if done, including measures of consistency (e.g., $I^2$ ) for each meta-analysis.                                                              | Page 7, 8                 |
|                                                                                                                                                          | Risk of bias across studies        | 15 | Specify any assessment of risk of bias that may affect the cumulative evidence (e.g., publication bias, selective reporting within studies).                                                                           | Page 7                    |
|                                                                                                                                                          | Additional analyses                | 16 | Describe methods of additional analyses (e.g., sensitivity or subgroup analyses, meta-regression), if done, indicating which were pre-specified.                                                                       | Page 7, 8                 |
|                                                                                                                                                          | <b>RESULTS</b>                     |    |                                                                                                                                                                                                                        |                           |
|                                                                                                                                                          | Study selection                    | 17 | Give numbers of studies screened, assessed for eligibility, and included in the review, with reasons for exclusions at each stage, ideally with a flow diagram.                                                        | Page 8, Fig 1             |
|                                                                                                                                                          | Study characteristics              | 18 | For each study, present characteristics for which data were extracted (e.g., study size, PICOS, follow-up period) and provide the citations.                                                                           | Table 1, Appendix 1, 2, 3 |
|                                                                                                                                                          | Risk of bias within studies        | 19 | Present data on risk of bias of each study and, if available, any outcome level assessment (see item 12).                                                                                                              | Page 9, Appendix 4, 5     |
|                                                                                                                                                          | Results of individual studies      | 20 | For all outcomes considered (benefits or harms), present, for each study: (a) simple summary data for each intervention group (b) effect estimates and confidence intervals, ideally with a forest plot.               | Fig 2, 4, Appendix 8, 10  |
|                                                                                                                                                          | Synthesis of results               | 21 | Present results of each meta-analysis done, including confidence intervals and measures of consistency.                                                                                                                | Page 9, Fig 2, 4,         |

|                             |    |                                                                                                                                                                                      |                                     |
|-----------------------------|----|--------------------------------------------------------------------------------------------------------------------------------------------------------------------------------------|-------------------------------------|
|                             |    |                                                                                                                                                                                      | Appendix 8, 10                      |
| Risk of bias across studies | 22 | Present results of any assessment of risk of bias across studies (see Item 15).                                                                                                      | Appendix 4, 5                       |
| Additional analysis         | 23 | Give results of additional analyses, if done (e.g., sensitivity or subgroup analyses, meta-regression [see Item 16]).                                                                | Page 9, 10, Fig 3, Appendix 6, 7, 9 |
| <b>DISCUSSION</b>           |    |                                                                                                                                                                                      |                                     |
| Summary of evidence         | 24 | Summarize the main findings including the strength of evidence for each main outcome; consider their relevance to key groups (e.g., healthcare providers, users, and policy makers). | Page 10                             |
| Limitations                 | 25 | Discuss limitations at study and outcome level (e.g., risk of bias), and at review-level (e.g., incomplete retrieval of identified research, reporting bias).                        | Page 10, 11                         |
| Conclusions                 | 26 | Provide a general interpretation of the results in the context of other evidence, and implications for future research.                                                              | Page 11, 12, 13                     |
| <b>FUNDING</b>              |    |                                                                                                                                                                                      |                                     |
| Funding                     | 27 | Describe sources of funding for the systematic review and other support (e.g., supply of data); role of funders for the systematic review.                                           | In submitting system                |
