# Supplementary material for: Caesarean sections and private insurance: systematic review and meta-analysis
Source: PubMed Central journal article supplement — BMJ Open. 2017 Aug 21;7(8):e016600. doi: 10.1136/bmjopen-2017-016600 (PMC5629699; doi:10.1136/bmjopen-2017-016600), 2017-08-21
Supplement: bmjopen-2017-016600supp001.pdf [file bmjopen-2017-016600supp001.pdf]

### Appendix 1. Reported exclusion criteria

| Authors                  | Year | Source population                            | Maternal characteristics |                             |            |                            |                                          | Fetus characteristics |                                |                           |                     |                       |                                    |                                          |               |                         |                          |               |
|--------------------------|------|----------------------------------------------|--------------------------|-----------------------------|------------|----------------------------|------------------------------------------|-----------------------|--------------------------------|---------------------------|---------------------|-----------------------|------------------------------------|------------------------------------------|---------------|-------------------------|--------------------------|---------------|
|                          |      |                                              | Age ≤14                  | Racial or ethnic minorities | Multiparae | Previous caesarean section | Other risk factors for caesarean section | Stillbirth            | Multiple births (twin or more) | Newborn weighting <500 gr | Breach presentation | Other malpresentation | Preterm birth (less than 37 weeks) | Other risk factors for caesarean section | Not in labour | Cases with missing data | Provider characteristics | Other factors |
| Stafford                 | 1990 | All births in California, United States      |                          |                             |            |                            |                                          |                       |                                |                           |                     |                       |                                    |                                          |               |                         |                          | +             |
| Haas et al. A            | 1993 | All births in Massachusetts, United States   |                          |                             |            |                            |                                          |                       |                                | +                         | +                   | +                     |                                    |                                          |               |                         |                          | +             |
| Haas et al. B            | 1993 | All births in Massachusetts, United States   |                          |                             |            |                            |                                          |                       |                                | +                         | +                   | +                     |                                    |                                          |               |                         |                          | +             |
| Braveman et al.          | 1995 | All births in California, United States      |                          |                             | +          | +                          |                                          |                       |                                | +                         | +                   |                       |                                    | +                                        |               |                         |                          | +             |
| Burns et al.             | 1995 | All births in Arizona, United States         |                          |                             |            |                            |                                          |                       |                                |                           |                     |                       |                                    |                                          |               |                         |                          | +             |
| Aron et al.              | 2000 | All births in Cleveland, Ohio, United States |                          |                             |            |                            | +                                        |                       |                                |                           |                     |                       |                                    |                                          |               |                         |                          | +             |
| Grant A                  | 2005 | All births, United States                    |                          |                             |            |                            |                                          |                       |                                |                           |                     |                       |                                    |                                          |               |                         |                          | +             |
| Grant B                  | 2005 | All births in Florida, United States         |                          |                             |            |                            |                                          |                       |                                |                           |                     |                       |                                    |                                          |               |                         |                          | +             |
| Grant C                  | 2005 | All births in Florida, United States         |                          |                             |            |                            |                                          |                       |                                |                           |                     |                       |                                    |                                          |               |                         |                          | +             |
| Korst et al.             | 2005 | All births in California, United States      |                          |                             |            | +                          | +                                        | +                     | +                              |                           |                     | +                     | +                                  | +                                        | +             | +                       |                          | +             |
| Misra                    | 2008 | All births in Maryland, United States        |                          |                             |            | +                          |                                          |                       |                                |                           |                     |                       |                                    |                                          |               |                         |                          | +             |
| Coonrod et al.           | 2008 | All births in Arizona, United States         |                          | +                           | +          |                            |                                          |                       |                                |                           |                     |                       |                                    |                                          |               |                         |                          | +             |
| Huesch                   | 2011 | All births in New Jersey, United States      |                          |                             |            | +                          | +                                        |                       |                                |                           |                     |                       |                                    |                                          |               |                         |                          | +             |
| Movsas et al.            | 2012 | All births in Michigan, United States        |                          |                             |            |                            |                                          |                       |                                | +                         |                     |                       |                                    |                                          |               |                         |                          | +             |
| Kozhimannil et al.       | 2013 | All births in 44 states, United States       |                          |                             |            |                            |                                          |                       |                                |                           |                     |                       |                                    |                                          |               |                         |                          | +             |
| Lutomski et al.          | 2014 | All births, Ireland                          |                          |                             |            |                            |                                          |                       |                                |                           |                     |                       |                                    |                                          |               |                         |                          | +             |
| Huesch et al.            | 2014 | All births in California, United States      | +                        |                             |            | +                          |                                          |                       |                                |                           |                     |                       |                                    |                                          |               |                         |                          | +             |
| Henke et al.             | 2014 | All births in 44 states, United States       |                          |                             |            | +                          |                                          |                       |                                | +                         | +                   | +                     |                                    |                                          |               |                         |                          | +             |
| Bannister-Tyrrell et al. | 2015 | All births in New South Wales, Australia     |                          |                             |            |                            |                                          |                       |                                |                           |                     |                       |                                    |                                          |               |                         |                          | +             |
| Sebastião et al.         | 2016 | All births in Florida, United States         |                          |                             | +          | +                          |                                          |                       |                                |                           |                     |                       |                                    |                                          |               |                         |                          | +             |
| Sentell et al.           | 2016 | All births in Hawaii, United States          |                          |                             |            |                            |                                          |                       |                                |                           |                     |                       |                                    |                                          |               |                         |                          | +             |

\*500 or less grams
