# Supplementary material for: Caesarean sections and private insurance: systematic review and meta-analysis
Source: PubMed Central journal article supplement — BMJ Open. 2017 Aug 21;7(8):e016600. doi: 10.1136/bmjopen-2017-016600 (PMC5629699; doi:10.1136/bmjopen-2017-016600), 2017-08-21
Supplement: bmjopen-2017-016600supp002.pdf [file bmjopen-2017-016600supp002.pdf]

## Appendix 2. Characteristics of data used for analysis

| Author                   | Year | Survey | Hospital records | Birth certificates/registry | Census data |
|--------------------------|------|--------|------------------|-----------------------------|-------------|
| Stafford                 | 1990 |        | +                |                             |             |
| Haas et al. A            | 1993 |        | +                | +                           |             |
| Haas et al. B            | 1993 |        | +                | +                           |             |
| Braveman et al.          | 1995 |        |                  | +                           | +           |
| Burns et al.             | 1995 |        | +                | +                           |             |
| Aron et al.              | 2000 |        | +                |                             |             |
| Grant A                  | 2005 | +      |                  |                             |             |
| Grant B                  | 2005 |        | +                |                             |             |
| Grant C                  | 2005 |        | +                |                             |             |
| Korst et al.             | 2005 |        | +                |                             |             |
| Misra                    | 2008 |        | +                |                             |             |
| Coonrod et al.           | 2008 |        |                  | +                           |             |
| Huesch                   | 2011 |        | +                |                             |             |
| Movsas et al.            | 2012 |        | +                | +                           |             |
| Kozhimannil et al.       | 2013 |        | +                |                             |             |
| Lutomski et al.          | 2014 |        | +                |                             |             |
| Huesch et al.            | 2014 |        | +                |                             |             |
| Henke et al.             | 2014 |        | +                |                             |             |
| Bannister-Tyrrell et al. | 2015 |        | +                |                             |             |
| Sebastião et al.         | 2016 |        | +                | +                           |             |
| Sentell et al.           | 2016 |        | +                |                             |             |
