# Supplementary material for: Caesarean sections and private insurance: systematic review and meta-analysis
Source: PubMed Central journal article supplement — BMJ Open. 2017 Aug 21;7(8):e016600. doi: 10.1136/bmjopen-2017-016600 (PMC5629699; doi:10.1136/bmjopen-2017-016600), 2017-08-21
Supplement: bmjopen-2017-016600supp003.pdf [file bmjopen-2017-016600supp003.pdf]

### Appendix 3. Covariates used for statistical adjustment

| Author                   | Year | Maternal preconception status |                   |                |                 |                   |              |        |        |                 | Maternal clinical status |        |                            |                                            | Foetus characteristics                |                 |              |                       |               | Total number of covariates |                       |                          |                 |   |
|--------------------------|------|-------------------------------|-------------------|----------------|-----------------|-------------------|--------------|--------|--------|-----------------|--------------------------|--------|----------------------------|--------------------------------------------|---------------------------------------|-----------------|--------------|-----------------------|---------------|----------------------------|-----------------------|--------------------------|-----------------|---|
|                          |      | Ethnicity/Race                | Educational level | Marital status | Economic status | Insurances status | Urban status | Weight | Height | Body mass index | Age                      | Parity | Previous caesarean section | Pre-existing (before pregnancy) conditions | Conditions developed during pregnancy | Gestational age | Birth weight | Other characteristics | Prenatal care |                            | Birth characteristics | Provider characteristics | Other variables |   |
| Stafford*                | 1990 |                               |                   |                |                 |                   |              |        |        |                 |                          |        |                            |                                            |                                       |                 |              |                       |               |                            |                       |                          | 0               |   |
| Haas et al. A*           | 1993 |                               |                   |                |                 |                   |              |        |        |                 |                          |        |                            |                                            |                                       |                 |              |                       |               |                            |                       |                          |                 | 0 |
| Haas et al. B*           | 1993 |                               |                   |                |                 |                   |              |        |        |                 |                          |        |                            |                                            |                                       |                 |              |                       |               |                            |                       |                          |                 | 0 |
| Braveman et al.          | 1995 | +                             | +                 | +              | +               | +                 |              |        |        | +               |                          |        | +                          |                                            |                                       | +               | +            | +                     | +             | ++                         | +                     |                          | 15              |   |
| Burns et al.             | 1995 | +                             | +                 |                |                 |                   |              |        |        | +               | +                        | +      |                            | ++                                         | +                                     | +               | ++           | +                     |               | ++                         | ++                    |                          | 33              |   |
| Aron et al.              | 2000 |                               |                   |                |                 |                   |              |        |        | +               | +                        |        | ++                         | ++                                         | ++                                    | ++              | ++           |                       |               | ++                         | ++                    |                          | 39              |   |
| Grant A                  | 2005 | ++                            | +                 | +              | +               |                   | +            | +      | +      | ++              |                          | +      | ++                         | ++                                         | +                                     | ++              | ++           | ++                    |               | ++                         | ++                    | ++                       | 68              |   |
| Grant B                  | 2005 | ++                            |                   |                |                 |                   | +            |        |        | ++              |                          | +      | ++                         | ++                                         | +                                     | ++              | ++           | +                     |               | ++                         | +                     |                          | 31              |   |
| Grant C                  | 2005 | ++                            |                   |                |                 |                   | +            |        |        | ++              |                          | +      | ++                         | ++                                         | +                                     | ++              | ++           | +                     |               | ++                         | +                     |                          | 31              |   |
| Korst et al.             | 2005 | +                             |                   |                |                 |                   |              |        |        | +               |                          |        |                            |                                            |                                       |                 |              |                       |               | ++                         |                       |                          | 6               |   |
| Misra                    | 2008 | +                             |                   |                |                 |                   |              |        |        | ++              |                          |        | ++                         | ++                                         |                                       |                 | ++           |                       | +             | ++                         | ++                    |                          | 30              |   |
| Coonrod et al.           | 2008 | +                             | +                 |                |                 |                   |              |        |        | +               |                          |        | ++                         | +                                          | +                                     | +               | +            | +                     | ++            | ++                         |                       |                          | 20              |   |
| Huesch                   | 2011 | +                             |                   | +              |                 |                   | +            |        |        | +               |                          |        |                            |                                            |                                       |                 |              |                       |               | +                          | ++                    |                          | 8               |   |
| Movsas et al.            | 2012 | +                             |                   |                |                 |                   |              |        |        | +               | +                        |        | +                          |                                            | +                                     | +               | +            |                       |               |                            | +                     |                          | 9               |   |
| Kozhimannil et al.       | 2013 | +                             |                   |                |                 |                   |              |        |        | +               | +                        | +      | ++                         | ++                                         | +                                     |                 | ++           |                       |               | ++                         | ++                    |                          | 16              |   |
| Lutomski et al.          | 2014 |                               |                   |                |                 |                   |              |        |        | +               |                          | +      | ++                         | +                                          |                                       |                 | +            |                       |               | ++                         | ++                    |                          | 6               |   |
| Huesch et al.            | 2014 | +                             |                   |                | +               |                   |              |        |        | +               |                          |        | ++                         | ++                                         | +                                     |                 | ++           | +                     | ++            | ++                         | ++                    | ++                       | 124             |   |
| Henke et al.             | 2014 | +                             | +                 |                | +               |                   |              |        |        | +               |                          |        | ++                         | ++                                         |                                       | +               |              |                       | ++            | ++                         | ++                    | ++                       | 28              |   |
| Bannister-Tyrrell et al. | 2015 |                               |                   |                |                 |                   |              |        |        |                 | +                        | +      | ++                         | ++                                         | +                                     |                 | +            |                       | ++            | +                          | +                     |                          | 12              |   |
| Sebastião et al.         | 2016 |                               |                   |                |                 |                   |              |        |        |                 |                          |        |                            |                                            |                                       |                 |              |                       |               |                            | +                     | +                        | 0               |   |
| Sentell et al. *         | 2016 | +                             |                   |                |                 |                   |              |        |        | +               | +                        |        |                            | +                                          |                                       |                 |              |                       |               |                            | +                     | +                        | 6               |   |

+ One covariate adjusted for    ++ Two or more covariates adjusted for

\*Stafford, Haas et al. and Sebastião et al. only reported crude estimates.
