# Supplementary material for: Caesarean sections and private insurance: systematic review and meta-analysis
Source: PubMed Central journal article supplement — BMJ Open. 2017 Aug 21;7(8):e016600. doi: 10.1136/bmjopen-2017-016600 (PMC5629699; doi:10.1136/bmjopen-2017-016600), 2017-08-21
Supplement: bmjopen-2017-016600supp004.pdf [file bmjopen-2017-016600supp004.pdf]

#### Appendix 4. QUIPS risk of bias

| Author                   | Year | Study participation | Study attrition | Prognostic factor measurement | Outcome measurement | Study confounding | Statistical analysis and reporting | Overall rating |
|--------------------------|------|---------------------|-----------------|-------------------------------|---------------------|-------------------|------------------------------------|----------------|
| Stafford                 | 1990 | low                 | low             | low                           | low                 | high              | moderate                           | high           |
| Haas et al. A            | 1993 | low                 | low             | low                           | low                 | high              | moderate                           | high           |
| Haas et al. B            | 1993 | low                 | low             | low                           | low                 | high              | moderate                           | high           |
| Braveman et al.          | 1995 | low                 | low             | low                           | low                 | moderate          | low                                | moderate       |
| Burns et al.             | 1995 | low                 | low             | low                           | low                 | moderate          | low                                | moderate       |
| Aron et al.              | 2000 | low                 | low             | low                           | low                 | low               | low                                | low            |
| Grant A                  | 2005 | moderate            | high            | low                           | low                 | low               | low                                | high           |
| Grant B                  | 2005 | low                 | low             | low                           | low                 | low               | low                                | low            |
| Grant C                  | 2005 | low                 | low             | low                           | low                 | low               | low                                | low            |
| Korst et al.             | 2005 | low                 | low             | low                           | low                 | moderate          | low                                | moderate       |
| Misra                    | 2008 | low                 | low             | low                           | low                 | moderate          | low                                | moderate       |
| Coonrod et al.           | 2008 | low                 | low             | low                           | low                 | low               | low                                | low            |
| Huesch                   | 2011 | low                 | low             | low                           | low                 | low               | low                                | low            |
| Movsas et al.            | 2012 | low                 | low             | low                           | low                 | moderate          | low                                | moderate       |
| Kozhimannil et al.       | 2013 | low                 | low             | low                           | low                 | low               | low                                | low            |
| Lutomski et al.          | 2014 | low                 | low             | low                           | low                 | moderate          | low                                | moderate       |
| Huesch et al.            | 2014 | low                 | low             | low                           | low                 | moderate          | low                                | moderate       |
| Henke et al.             | 2014 | low                 | low             | low                           | low                 | moderate          | low                                | moderate       |
| Bannister-Tyrrell et al. | 2015 | low                 | low             | low                           | low                 | moderate          | low                                | moderate       |
| Sebastião et al.         | 2016 | low                 | low             | low                           | low                 | high              | moderate                           | high           |
| Sentell et al.           | 2016 | low                 | low             | low                           | low                 | moderate          | low                                | moderate       |
