# Supplementary material for: Caesarean sections and private insurance: systematic review and meta-analysis
Source: PubMed Central journal article supplement — BMJ Open. 2017 Aug 21;7(8):e016600. doi: 10.1136/bmjopen-2017-016600 (PMC5629699; doi:10.1136/bmjopen-2017-016600), 2017-08-21
Supplement: bmjopen-2017-016600supp011.pdf [file bmjopen-2017-016600supp011.pdf]

## Appendix 11. Search Strategy

### 1. For Medline (PubMed)

((((((causes OR determinants OR statistics OR rates OR factors OR decision\* OR physician\* OR socioeconomic OR state medicine OR evidence-based OR hospital OR hospitals OR hospitalization OR hospitalized OR uncertain\* OR educational status OR social class OR obstetric\* OR gynecolog\* OR supply OR distribut\* OR utilization OR insurance OR choice OR attitude OR patient OR economics OR maternal OR accessib\* OR health service\* OR rural population OR urban population[Title/Abstract])) NOT medline[sb])) OR ("Decision Making"[Mesh] OR "Physician's Practice Patterns"[Mesh] OR "Socioeconomic Factors"[Mesh] OR "State Medicine"[Mesh] OR "Evidence-Based Medicine"[Mesh] OR "Hospitals"[Mesh] OR "Uncertainty"[Mesh] OR "Educational Status"[Mesh] OR "Hospital Costs"[Mesh] OR "Physician Incentive Plans"[Mesh] OR "Social Class"[Mesh] OR "Obstetrics and Gynecology Department, Hospital"[Mesh] OR "supply and distribution"[Subheading] OR "utilization"[Subheading] OR "Insurance"[Mesh] OR "Choice Behavior"[Mesh] OR "Attitude to Health"[Mesh] OR "Patient Participation"[Mesh] OR "Physician-Patient Relations"[Mesh] OR "Economics, Hospital"[Mesh] OR "Maternal Health Services"[Mesh] OR "Health Services Accessibility"[Mesh] OR "Health Services Research"[Mesh] OR "Rural Population"[Mesh] OR "Urban Population"[Mesh]))) OR factors OR rates OR statistics OR causes OR determinants AND (((((operative delivery OR caesarean section OR cesarean section OR c-section OR c section OR caesarean OR cesarean OR caesarean delivery OR cesarean delivery OR caesarean rates OR cesarean rates)))) OR cesarean section [MeSH Terms])) AND (((("Catchment Area (Health)"[Mesh] OR "Small-Area Analysis"[Mesh]))) OR (((small area analysis OR small area analyses OR medical practice variation OR regions OR geographic variation OR variation))))))

### 2. Embase (Ovid SP)

| HF | # ▲ | Searches                                                                                | Results | Search Type | Actions            |
|----|-----|-----------------------------------------------------------------------------------------|---------|-------------|--------------------|
| HF | 1   | decision making/                                                                        | 134077  | Advanced    | Display<br>More >> |
| HF | 2   | professional practice/ or group practice/ or health care practice/ or medical practice/ | 129049  | Advanced    | Display<br>More >> |
| HF | 3   | socioeconomics/                                                                         | 110558  | Advanced    | Display<br>More >> |
| HF | 4   | state medicine.mp. or national health service/                                          | 54605   | Advanced    | Display<br>More >> |
| HF | 5   | evidence based medicine/                                                                | 80825   | Advanced    | Display<br>More >> |
| HF | 6   | hospital/                                                                               | 216188  | Advanced    | Display<br>More >> |
| HF | 7   | uncertainty/                                                                            | 6158    | Advanced    | Display<br>More >> |
| HF | 8   | educational status/                                                                     | 36032   | Advanced    | Display<br>More >> |
| HF | 9   | "hospital cost"/                                                                        | 13192   | Advanced    | Display<br>More >> |
| HF | 10  | physician incentive plans.mp. or personnel management/                                  | 49572   | Advanced    | Display<br>More >> |
| HF | 11  | social class/                                                                           | 26291   | Advanced    | Display<br>More >> |
| HF | 12  | hospital department/                                                                    | 21809   | Advanced    | Display<br>More >> |
| HF | 13  | obstetrics/                                                                             | 27326   | Advanced    | Display<br>More >> |
| HF | 14  | gynecology/                                                                             | 29917   | Advanced    | Display<br>More >> |
| HF | 15  | 13 or 14                                                                                | 42128   | Advanced    | Display<br>More >> |

|    |    |                                                                                                                                                                                                            |         |          |                              |
|----|----|------------------------------------------------------------------------------------------------------------------------------------------------------------------------------------------------------------|---------|----------|------------------------------|
| HF | 16 | 12 and 15                                                                                                                                                                                                  | 413     | Advanced | Display<br>More >>           |
| HF | 17 | health care distribution/                                                                                                                                                                                  | 2333    | Advanced | Display<br>More >>           |
| HF | 18 | health care utilization/                                                                                                                                                                                   | 36879   | Advanced | Display<br>More >>           |
| HF | 19 | insurance/                                                                                                                                                                                                 | 33934   | Advanced | Display<br>More >>           |
| HF | 20 | choice behavior.mp.                                                                                                                                                                                        | 765     | Advanced | Display<br>More >>           |
| HF | 21 | attitude to health/                                                                                                                                                                                        | 81021   | Advanced | Display<br>More >>           |
| HF | 22 | patient participation/                                                                                                                                                                                     | 16400   | Advanced | Display<br>More >>           |
| HF | 23 | doctor patient relation/                                                                                                                                                                                   | 81043   | Advanced | Display<br>More >>           |
| HF | 24 | health economics/                                                                                                                                                                                          | 33098   | Advanced | Display<br>More >>           |
| HF | 25 | obstetric procedure/                                                                                                                                                                                       | 550     | Advanced | Display<br>More >>           |
| HF | 26 | health care access/                                                                                                                                                                                        | 34433   | Advanced | Display                      |
| HF | 27 | health services research/                                                                                                                                                                                  | 27579   | Advanced | Display<br>More >>           |
| HF | 28 | geographic distribution/                                                                                                                                                                                   | 132846  | Advanced | Display<br>More >>           |
| HF | 29 | rural population/                                                                                                                                                                                          | 30219   | Advanced | Display<br>More >>           |
| HF | 30 | urban population/                                                                                                                                                                                          | 35323   | Advanced | Display<br>More >>           |
| HF | 31 | causes/                                                                                                                                                                                                    | 0       | Advanced | Delete<br>More >>            |
| HF | 32 | determinants/                                                                                                                                                                                              | 1       | Advanced | Display<br>More >>           |
| HF | 33 | statistics/                                                                                                                                                                                                | 301146  | Advanced | Display<br>More >>           |
| HF | 34 | rates/                                                                                                                                                                                                     | 0       | Advanced | Delete<br>More >>            |
| HF | 35 | factors/                                                                                                                                                                                                   | 0       | Advanced | Delete<br>More >>            |
| HF | 36 | 1 or 2 or 3 or 4 or 5 or 6 or 7 or 8 or 9 or 10 or 11 or 16 or 17 or 18 or 19 or 20 or 21 or 22 or 23 or 24 or 25 or 26 or 27 or 29 or 30 or 32 or 33                                                      | 1340916 | Advanced | Display<br>More >>           |
| HF | 37 | cesarean section/                                                                                                                                                                                          | 59755   | Advanced | Display<br>More >>           |
| HF | 38 | (caesarean section or cesarean section or c-section or c section or caesarean or cesarean or caesarean delivery or cesarean delivery or caesarean rates or cesarean rates or operative delivery).ti,ab,tw. | 53950   | Advanced | Display<br>Delete<br>More >> |
| HF | 39 | 37 or 38                                                                                                                                                                                                   | 73014   | Advanced | Display<br>More >>           |
| HF | 40 | (small area analysis or small area analyses or small aera or medical practice variation or regions or geographic variation or variation or variations).ti,ab,tw.                                           | 964890  | Advanced | Display<br>More >>           |
| HF | 41 | 28 or 40                                                                                                                                                                                                   | 1082827 | Advanced | Display<br>More >>           |
| HF | 42 | 36 and 39 and 41                                                                                                                                                                                           | 357     | Advanced | Display<br>More >>           |

### 3. Cochrane Library

Caesarean section and insurance
