# Supplementary figures and images for: Caesarean sections and private insurance: systematic review and meta-analysis
Source: PubMed Central journal article supplement — BMJ Open. 2017 Aug 21;7(8):e016600. doi: 10.1136/bmjopen-2017-016600 (PMC5629699; doi:10.1136/bmjopen-2017-016600), 2017-08-21

### Appendix 5 - QUIPS risk of bias

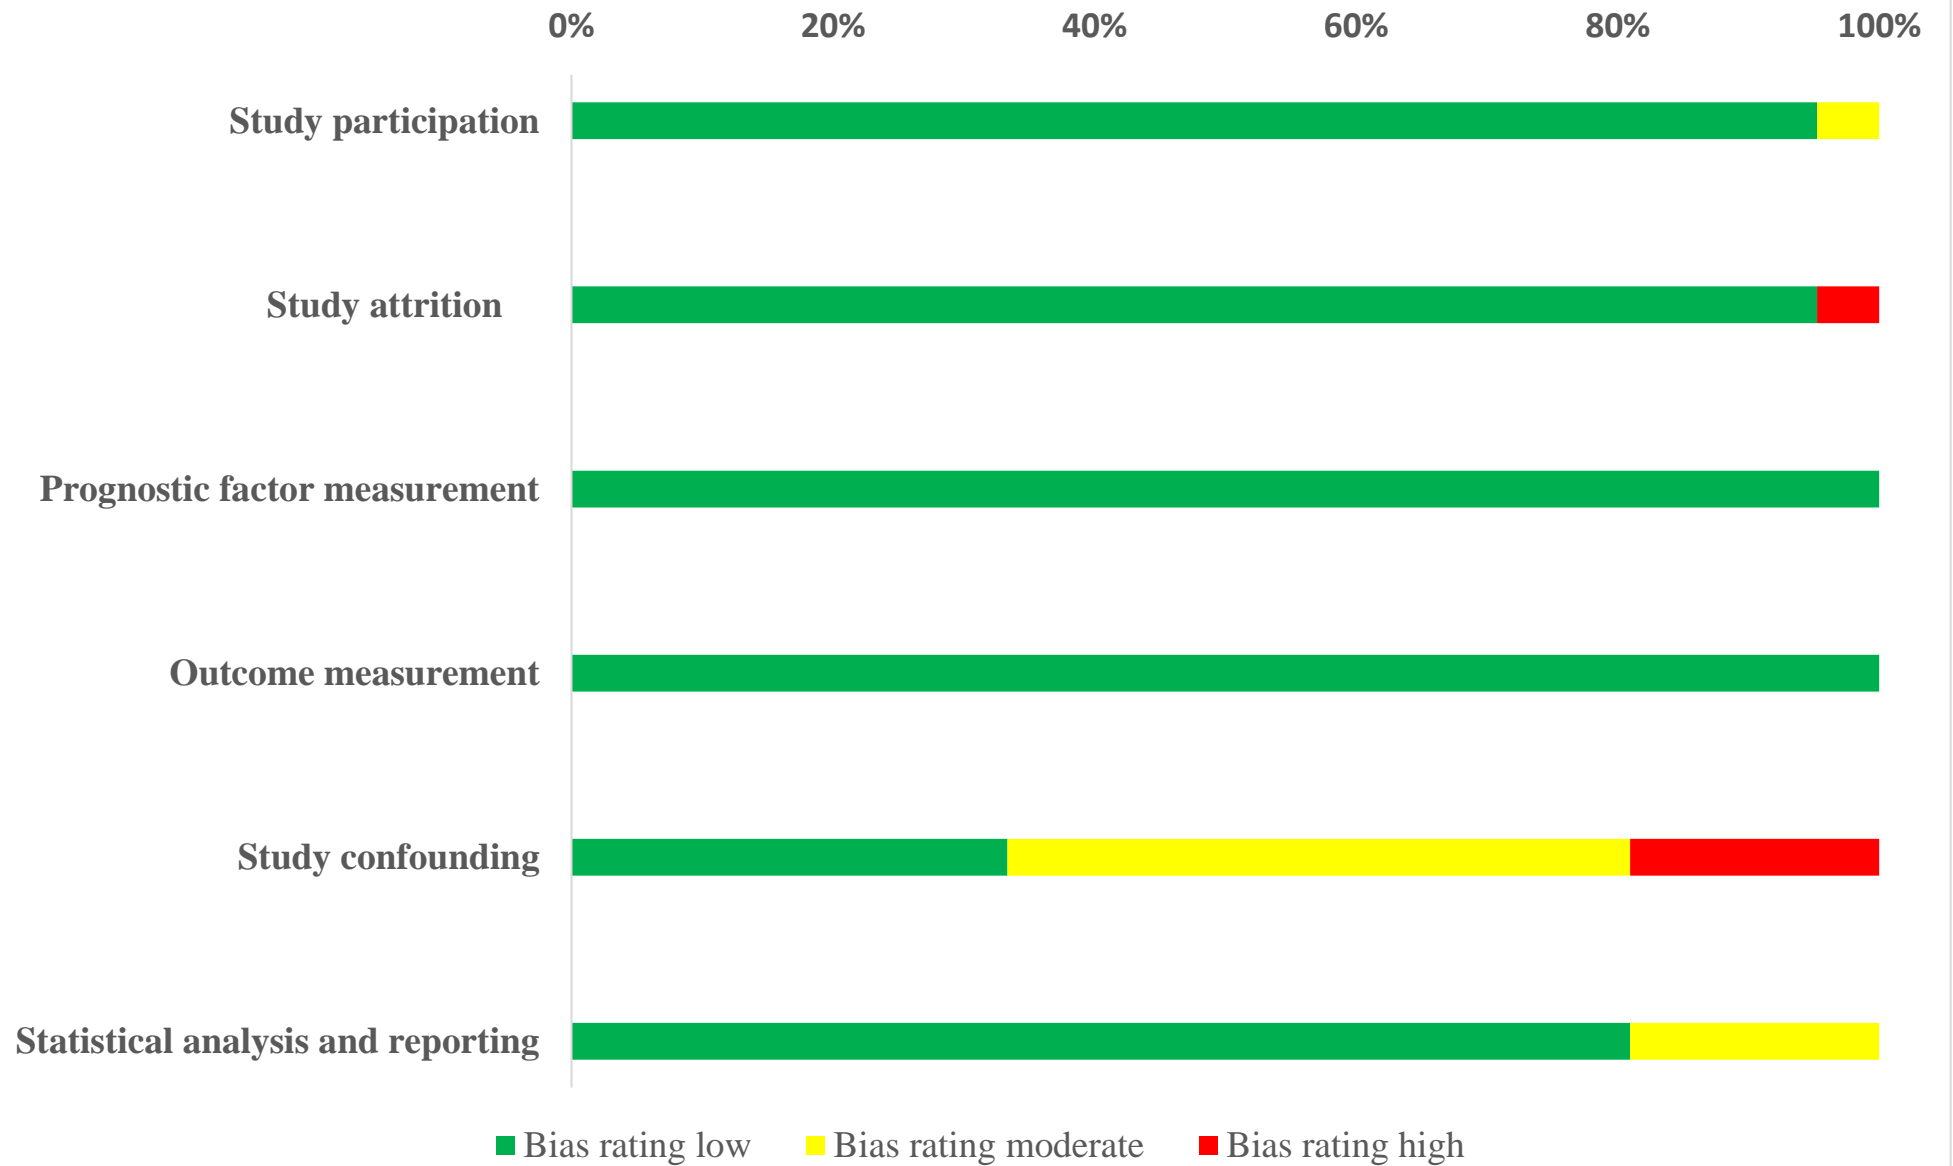

Supplement: bmjopen-2017-016600supp005.pdf [file bmjopen-2017-016600supp005.pdf]

**Appendix 6. Funnel plot of adjusted ORs against their standard errors on a log scale**

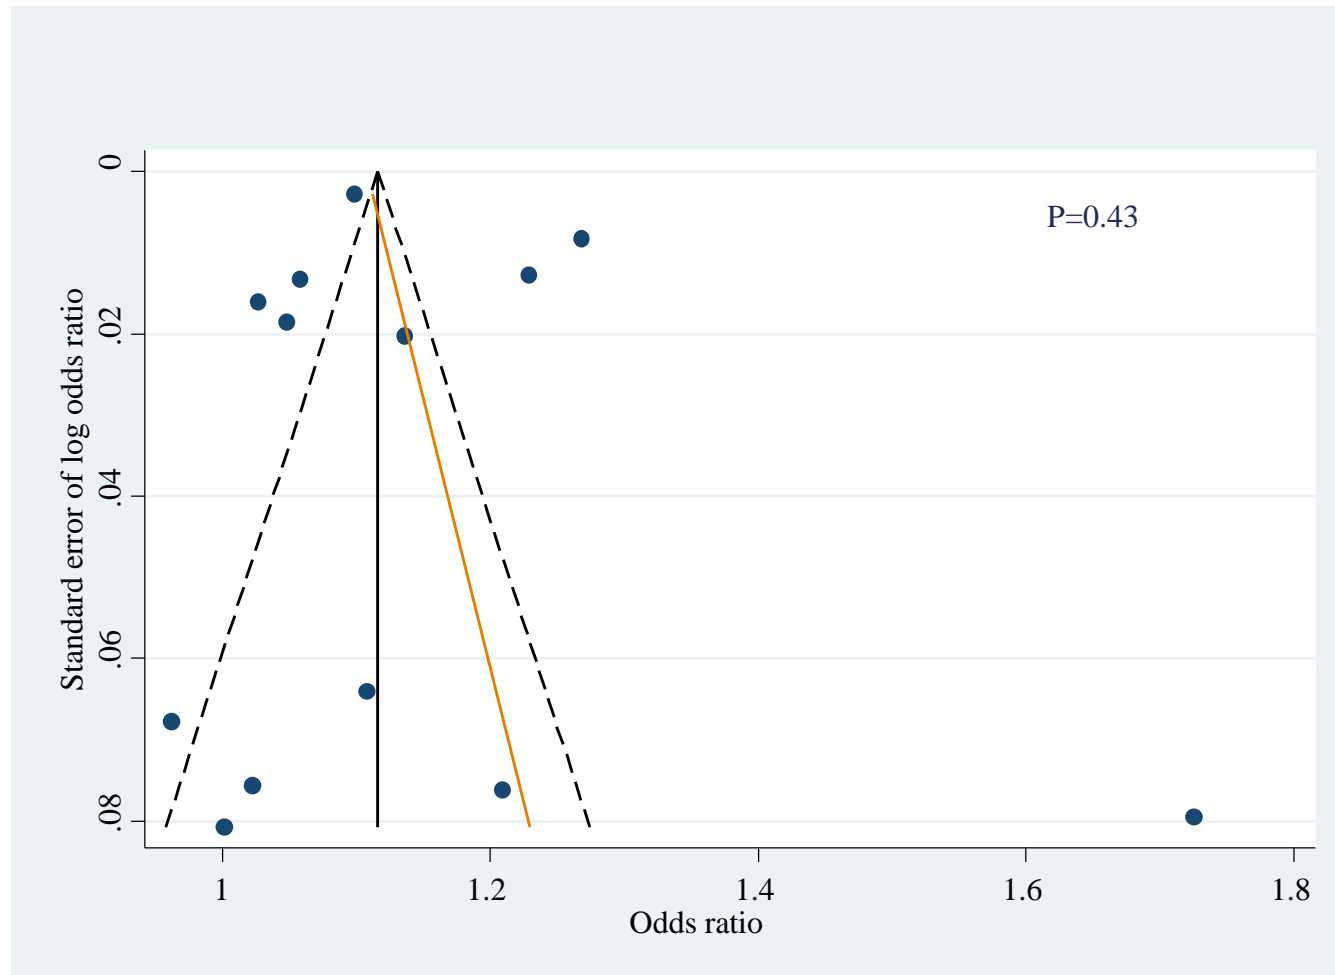

Supplement: bmjopen-2017-016600supp006.pdf [file bmjopen-2017-016600supp006.pdf]

## Appendix 7. Caesarean section rates in the United States

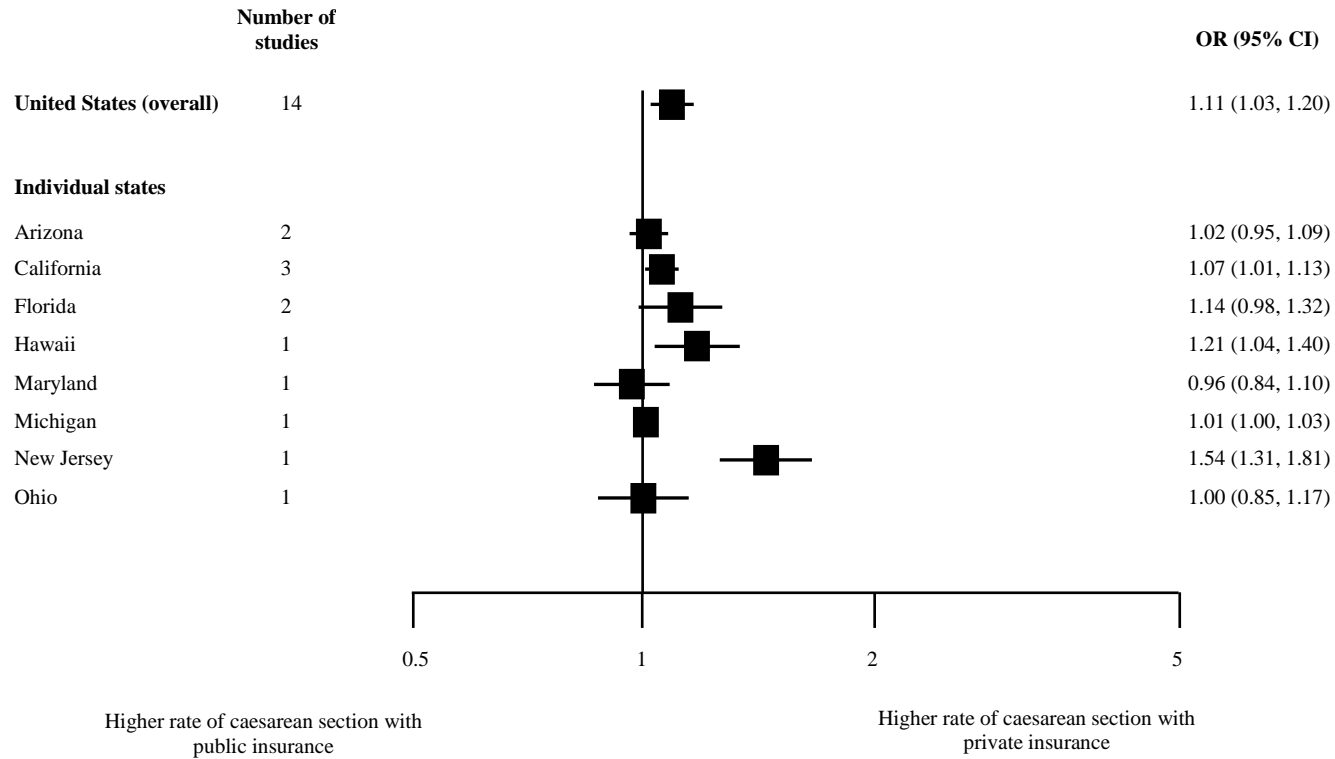

Supplement: bmjopen-2017-016600supp007.pdf [file bmjopen-2017-016600supp007.pdf]

## Appendix 8. Sensitivity analysis - Adjusted odds ratios of caesarean section

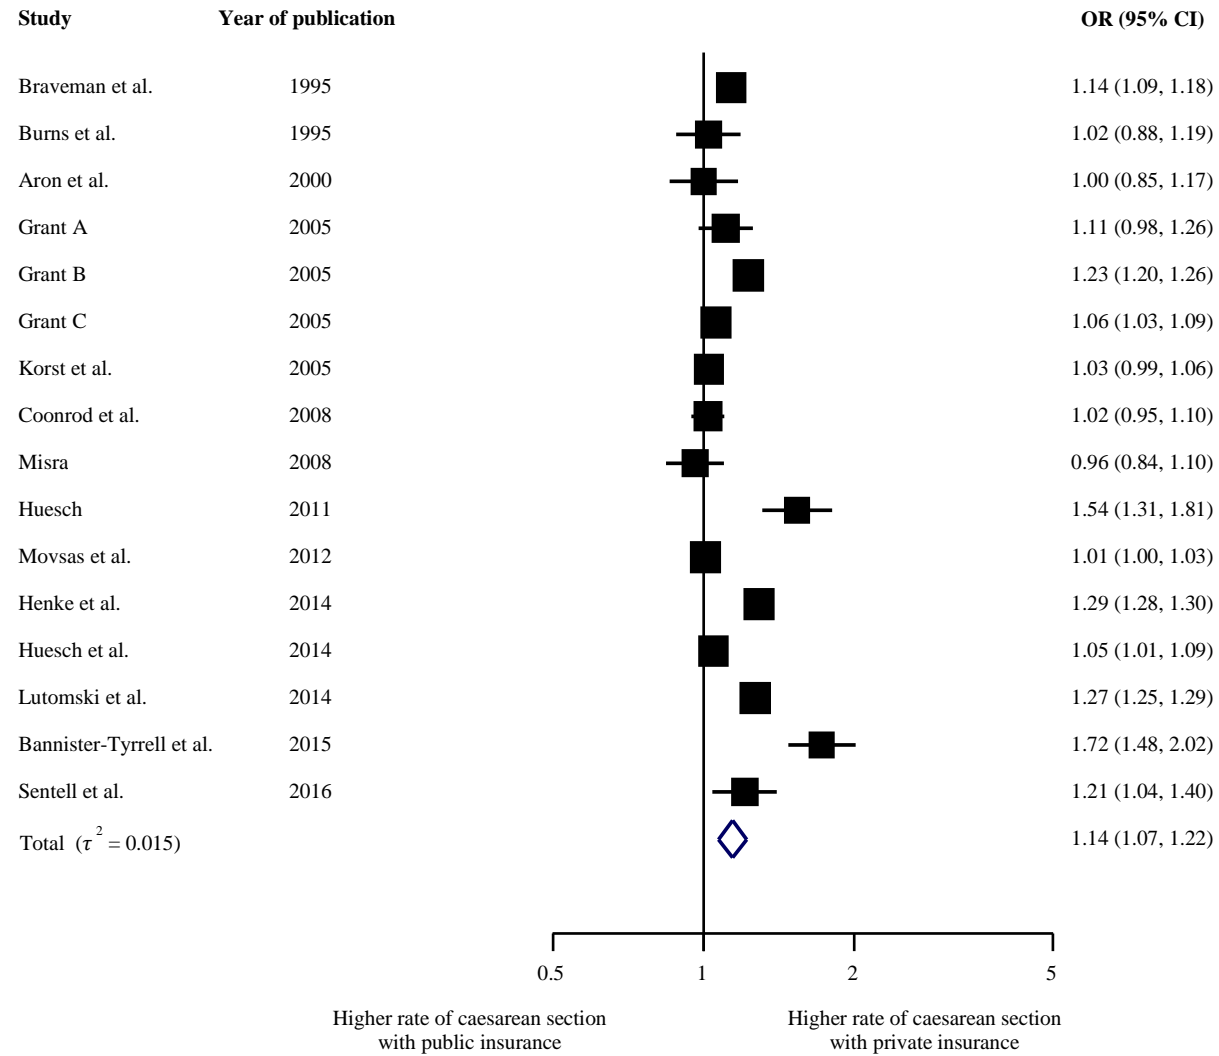

Supplement: bmjopen-2017-016600supp008.pdf [file bmjopen-2017-016600supp008.pdf]

## Appendix 9. Sensitivity analysis – Stratified analyses

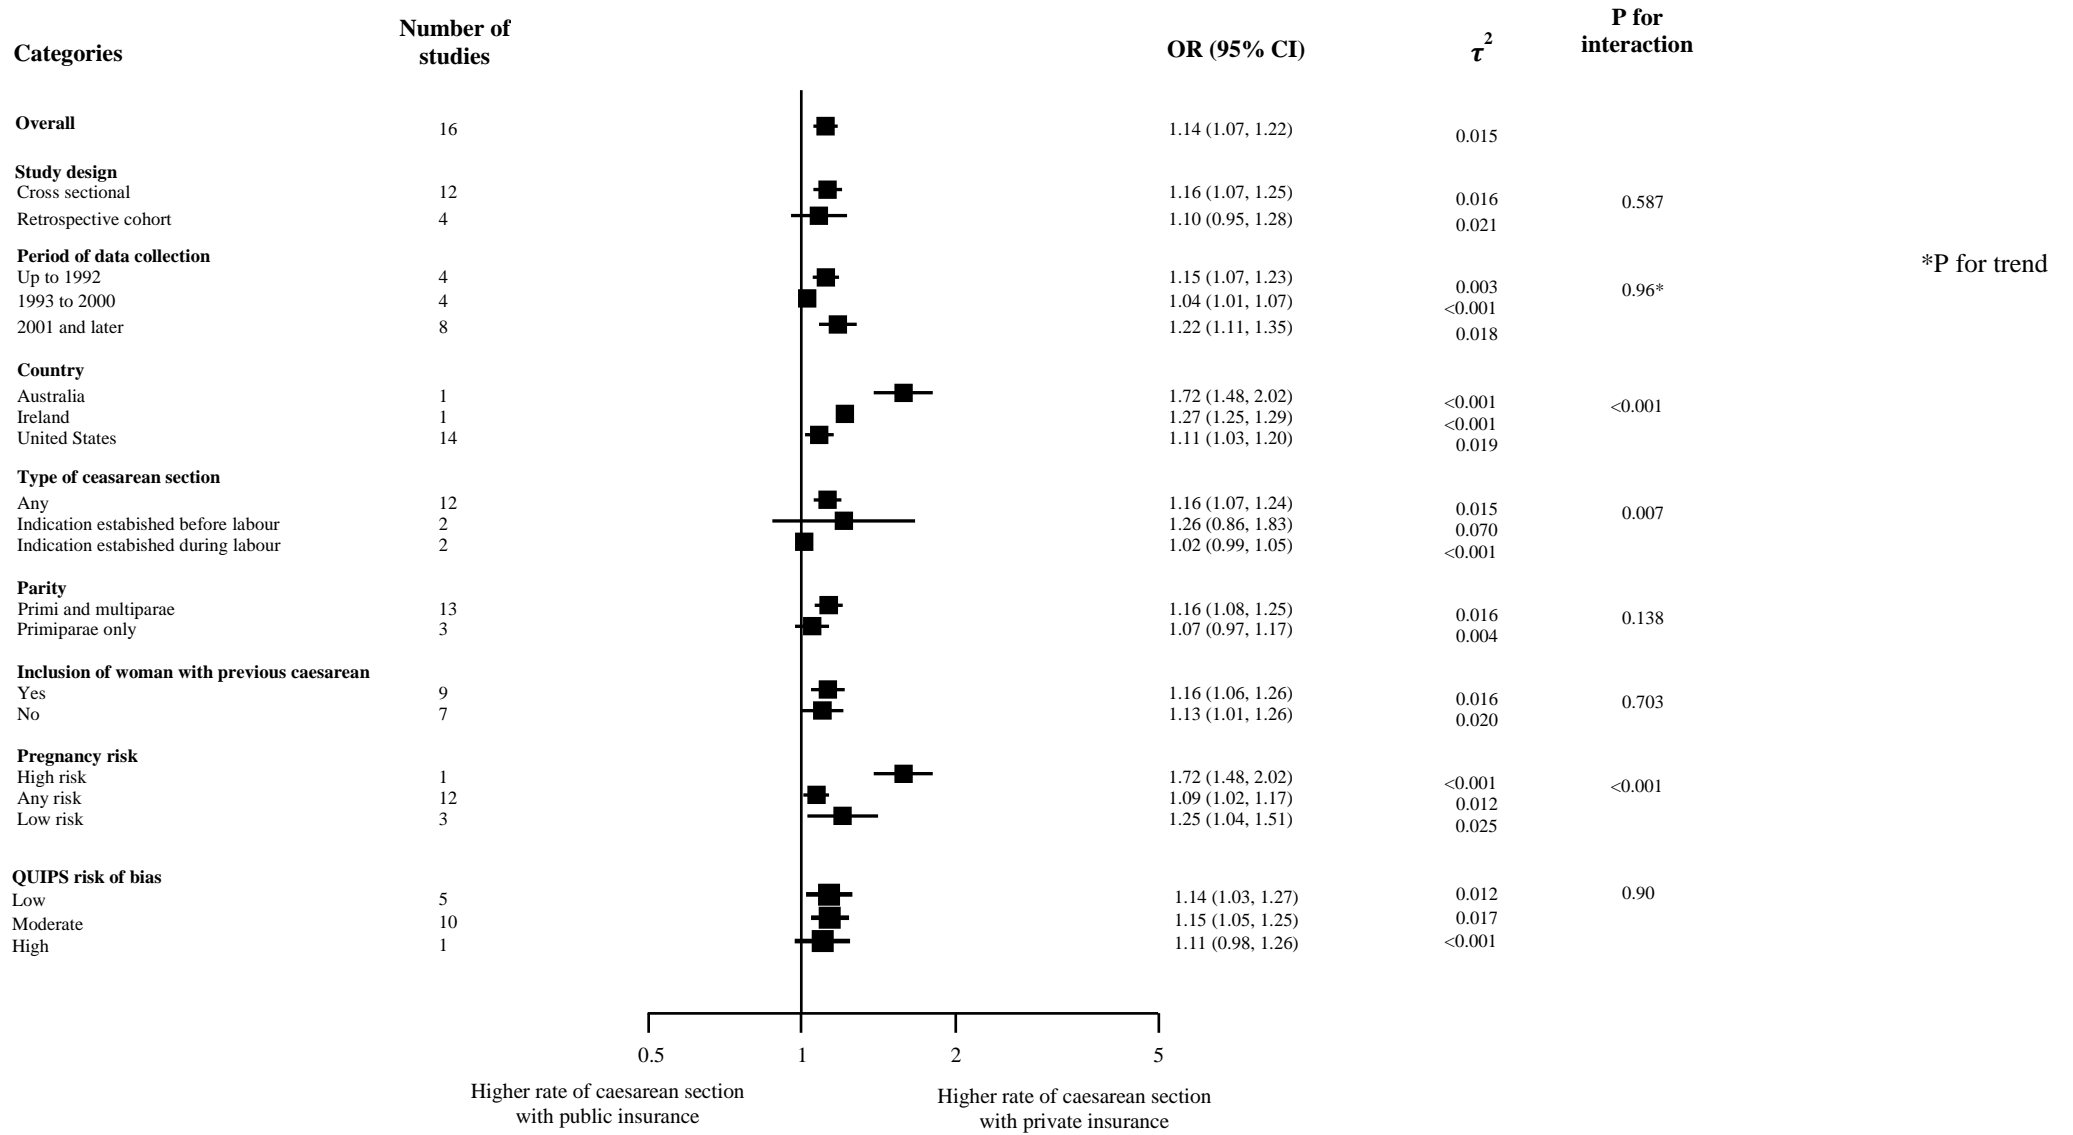

Supplement: bmjopen-2017-016600supp009.pdf [file bmjopen-2017-016600supp009.pdf]

## Appendix 10. Sensitivity analysis - Crude odds ratios of caesarean section

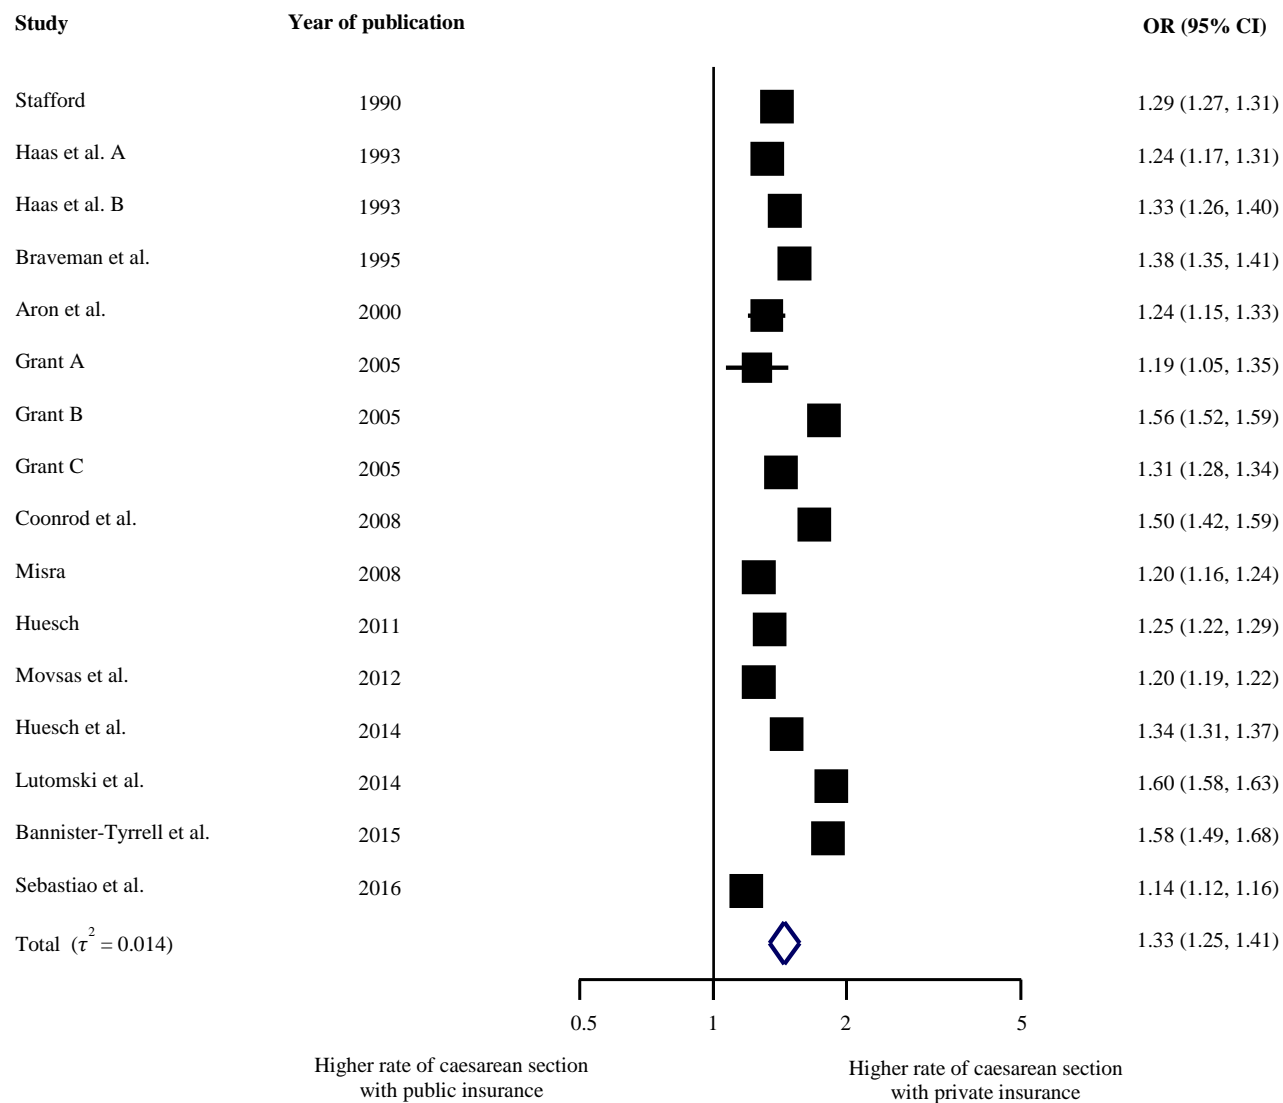

Supplement: bmjopen-2017-016600supp010.pdf [file bmjopen-2017-016600supp010.pdf]
